# Supplementary material for: Dithienoarsinines: stable and planar π-extended arsabenzenes
Source: Royal Society of Chemistry journal article supplement (doi:10.1039/d4sc06590e), 2024-11-19
Supplement: d4sc06590e1.pdf [file d4sc06590e1.pdf]

## Dithienoarsinines: Stable and Planer $\pi$ -Extended Arsabenzenes

*Akifumi Sumida,<sup>a</sup> Akinori Saeki,<sup>bc</sup> Kyohei Matsuo,<sup>d</sup> Kensuke Naka,<sup>ae</sup> and Hiroaki Imoto<sup>\*aef</sup>*

- [a] Faculty of Molecular Chemistry and Engineering, Graduate School of Science and Technology, Kyoto Institute of Technology, Goshokaido-cho, Matsugasaki, Sakyo-ku, Kyoto 606-0962, Japan
- [b] Department of Applied Chemistry, Graduate School of Engineering, Osaka University, 2-1 Yamadaoka, Suita, Osaka 565-0871, Japan
- [c] Innovative Catalysis Science Division, Institute for Open and Transdisciplinary Research Initiatives (ICS-OTRI), Osaka University, 1-1 Yamadaoka, Suita, Osaka 565-0871, Japan
- [d] Institute for Chemical Research, Kyoto University, Gokasho, Uji, Kyoto 611-0011, Japan
- [e] Materials Innovation Lab, Kyoto Institute of Technology, Goshokaido-cho, Matsugasaki, Sakyo-ku, Kyoto 606-0962, Japan.
- [f] Fusion Oriented Research for Disruptive Science and Technology (FOREST), Japan Science and Technology Corporation (JST), Honcho 4-1-8, Kawaguchi, Saitama 332-0012, Japan.

### **Contents:**

- 1 General Information
- 2 Materials
- 3 Synthesis
- 4 X-ray diffraction analysis
- 5 Photophysical properties
- 6 Reactivity
- 7 Time-resolved microwave conductivity
- 8 DFT calculations
- 9 NMR spectra

## 1. General Information

All reactions were carried under dry nitrogen atmosphere otherwise noted. Unless otherwise noted, all commercial reagents were used without additional purification. All dry solvents were stored with molecular sieves.  $^1\text{H}$  (400 MHz),  $^{13}\text{C}\{^1\text{H}\}$  (100 MHz),  $^{31}\text{P}$  (162 MHz) NMR spectra were recorded on a Bruker AVANCE III 400 NMR spectrometer using  $\text{Me}_4\text{Si}$  (TMS) as an internal standard. The following abbreviations are used; s: singlet, d: doublet, t: triplet, q: quartet, m: multiplet. High-resolution mass spectra (HRMS) were obtained on a JEOL JMS-SX102A spectrometer. Matrix assisted laser desorption ionization time-of-flight mass spectrometry (MALDI-TOF-MS) was recorded on a Bruker Autoflex II instrument (Bruker Daltonics, Billerica, MA, USA): *trans*-2-[3-(4-*tert*-butylphenyl)-2-methyl-2-propenylidene]malononitrile (DCTB) matrix (20 mg/mL in  $\text{CHCl}_3$ ) and sodium trifluoroacetate cationizing agents (1 mg/mL in THF). X-ray diffractometry (XRD) studies were performed on a Rigaku SmartLab with Cu  $K\alpha$  radiation ( $\lambda = 1.5406 \text{ \AA}$ ) in the  $2\theta/\theta$  mode at room temperature. The  $2\theta$  scan data were collected at  $0.01^\circ$  intervals and the scan speed was  $10^\circ$  ( $2\theta$ )/min. UV/Vis spectra were recorded on a JASCO spectrophotometer V-670 KNN. Emission and excitation spectra were obtained on an FP-8500 (JASCO) spectrometer and the absolute PL quantum yields ( $\Phi$ ) were determined by using a JASCO ILFC-847S; the quantum yield of quinine sulfate as a reference was 0.52, which is in agreement with the literature value. Emission lifetimes were measured by using a Quantaaurus-Tau (Hamamatsu Photonics, Shizuoka, Japan) instrument.

## 2. Materials

All solvents used for the synthesis, *N*-bromosuccinimide, *N*-iodosuccinimide, magnesium, and Cerite<sup>®</sup> were purchased from FUJIFILM Wako Pure Chemical Industry, Ltd. *n*-Butyllithium (*n*-BuLi, 1.51 M in hexane) was purchased from Kanto Chemical Co. Inc. Dimethyltin dichloride, ethyl formate, lithium chloride (LiCl), triethylsilane ( $\text{Et}_3\text{SiH}$ ), dimethyl acetylenedicarboxylate (DMAD), 2-TMS-benzenetriflate, and tetrabutylammonium fluoride (TBAF, 1.0 M in THF) were purchased from Tokyo Chemical Industry Co. Ltd. Trifluoroacetic acid and 1,8-diazabicyclo[5.4.0]undec-7-ene (DBU) were purchased from Nacalai Tesque. Phosphorus tribromide (1.0 M in DCM), and tungsten hexacarbonyl ( $\text{W}(\text{CO})_6$ ) were purchased from Sigma-Aldrich. Bis(2-bromothinyl)methane,<sup>[1]</sup> bis(3-bromothinyl)methane,<sup>[2]</sup> tribromoarsine ( $\text{AsBr}_3$ ),<sup>[3]</sup> bis-2-(3-bromobenzo[*b*]thienyl)methane,<sup>[4]</sup> and **3d-P**<sup>[5]</sup> were synthesized according to literature procedures.

### 3. Synthesis

#### 8,8-Dimethyl-4,8-dihydrostano[2,3-*b*:6,5-*b'*]dithiophene (**2a**)

To a solution of bis(2-bromothynyl)methane (1.09 g, 3.21 mmol) in ether (60 mL) was added *n*-BuLi (1.51 M in hexane, 4.36 mL, 6.58 mmol) dropwise at  $-78\text{ }^{\circ}\text{C}$  and the mixture was stirred for 30 min at the same temperature. Then, dimethyltin dichloride (0.7756 g, 3.53 mmol) in ether (10 mL) was added dropwise into the mixture at the same temperature, and the mixture was warmed to room temperature. After stirring at room temperature overnight, the volatiles were removed *in vacuo*. The crude product was dissolved in hexane and passed through the Cerite<sup>®</sup> and the volatiles were removed to give the title compound with sufficient purity, which was used for the next reaction without purification. <sup>1</sup>H-NMR (CDCl<sub>3</sub>, 400 MHz):  $\delta$  7.65 (d,  $J = 4.6$  Hz, 2H), 7.20 (d,  $J = 4.6$  Hz, 2H), 4.38 (s, 2H), 0.58 (s, 6). ppm. HR-FAB-MASS (m/z): calculated for C<sub>11</sub>H<sub>13</sub>S<sub>2</sub>Sn [M+H]<sup>+</sup>; 328.9475, observed; 328.9483.

#### Dithieno[2,3-*b*:3',2'-*e*]arsinine (**3a**)

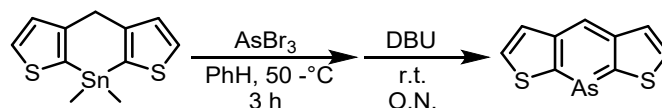

The crude mixture of **2a** was dissolved in benzene (15 mL) was added arsenic tribromide (1.11 g, 3.53 mmol) and the mixture was stirred for 3 h at  $50\text{ }^{\circ}\text{C}$ . Then, DBU (1.5 mL, 10 mmol) was added into the mixture at room temperature, and stirred overnight. The volatiles were removed *in vacuo*. The crude product was washed with ethanol in argon-filled glove box to give the title compounds as yellow solid (272.4 mg, 1.08 mmol, 34%). <sup>1</sup>H-NMR (CDCl<sub>3</sub>, 400 MHz):  $\delta$  8.62 (s, 1H), 7.71 (d,  $J = 5.3$  Hz, 2H), 7.64 (d,  $J = 5.3$  Hz, 2H). ppm. HR-FAB-MASS (m/z): calculated for C<sub>9</sub>H<sub>5</sub>S<sub>2</sub>As [M]<sup>+</sup>; 251.9049, observed; 251.9058.

#### 8,8-Dimethyl-4,8-dihydrostano[1,2-*b*:4,3-*b'*]dithiophene (**2b**)

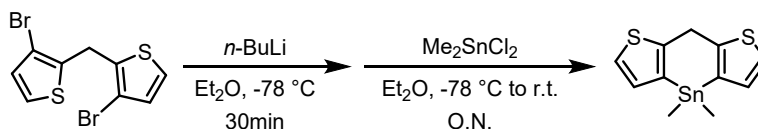

To a solution of bis(3-bromothynyl)methane (0.511 g, 1.51 mmol) in ether (30 mL) was added *n*-BuLi (1.51 M in hexane, 2.05 mL, 3.10 mmol) dropwise at  $-78\text{ }^{\circ}\text{C}$  and the mixture was stirred for 30 min at the same temperature. Then, dimethyltin dichloride (0.365 g, 1.66 mmol) in ether (5 mL) was added dropwise into the mixture at the same temperature, and the mixture was warmed to room temperature. After stirring at room temperature overnight, the volatiles were removed *in vacuo*. The crude product was dissolved in benzene and passed through the Cerite<sup>®</sup> and the volatiles were removed to give the title compound with sufficient

purity, which was used for the next reaction without purification.  $^1\text{H-NMR}$  ( $\text{CDCl}_3$ , 400 MHz):  $\delta$  7.32 (d,  $J = 4.9$  Hz, 2H), 7.12 (d,  $J = 5.0$  Hz, 2H), 4.61 (s, 2H), 0.48 (s, 6H). ppm. HR-FAB-MASS ( $m/z$ ): calculated for  $\text{C}_{11}\text{H}_{13}\text{S}_2\text{Sn}$   $[\text{M}+\text{H}]^+$ ; 328.9475, observed; 328.9486.

#### Dithieno[3,2-*b*:2',3'-*e*]arsinine (**3b**)

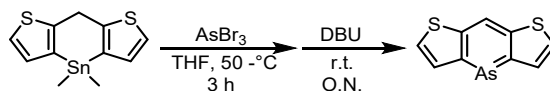

The crude mixture of **2b** was dissolved in benzene (7.5 mL) was added arsenic tribromide (0.523 g, 1.66 mmol) and the mixture was stirred for 3 h at 50 °C. Then, DBU (0.70 mL, 4.7 mmol) was added into the mixture at room temperature, and stirred overnight. the volatiles were removed *in vacuo*. The crude product was washed with ethanol in argon-filled glove box to give the title compounds as red solid (68.2 mg, 0.270 mmol, 18%).  $^1\text{H-NMR}$  ( $\text{CDCl}_3$ , 400 MHz):  $\delta$  8.75 (s, 1H), 7.93 (d,  $J = 5.4$  Hz, 2H), 7.58 (d,  $J = 5.4$  Hz, 2H) ppm;  $^{13}\text{C-NMR}$  ( $\text{CDCl}_3$ , 100 MHz):  $\delta$  168.9, 141.1, 130.9, 126.3, 119.2 ppm. HR-FAB-MASS ( $m/z$ ): calculated for  $\text{C}_9\text{H}_5\text{S}_2\text{As}$   $[\text{M}]^+$ ; 251.9049, observed; 251.9052.

#### Bis-3-benzo[*b*]thienylmethanol

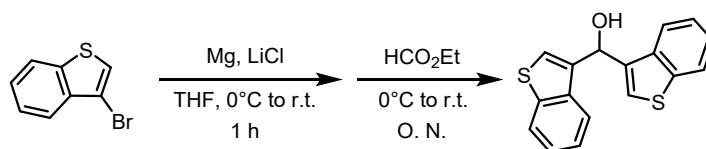

To a suspension of magnesium (0.970 g, 39.9 mmol) and LiCl (1.77 g, 41.8 mmol) in THF (2 mL) was added 1 M THF solution of 3-bromobenzo[*b*]thiophene (5.0 mL, 38 mmol) at 0 °C and the mixture was stirred for 1 h at the same temperature. Then, ethyl formate (1.54 mL, 19.1 mmol) was added into the mixture at 0 °C, and stirred overnight. the mixture was quenched with sat.  $\text{NH}_4\text{Cl}$  *aq.* and extracted with ether. The extracts were dried over anhydrous  $\text{Na}_2\text{SO}_4$  and after filtration, the volatiles were removed in *vacuo*. The crude product had sufficient purity, which was used for the next reaction without purification.  $^1\text{H-NMR}$  ( $\text{CDCl}_3$ , 400 MHz):  $\delta$  7.90–7.85 (m, 4H), 7.83–7.79 (m, 4H), 6.53 (d,  $J = 4.5$  Hz, 1H), 2.49 (d,  $J = 4.6$  Hz, 1H) ppm. HR-FAB-MASS ( $m/z$ ): calculated for  $\text{C}_{17}\text{H}_{12}\text{OS}_2$   $[\text{M}]^+$ ; 296.0330, observed; 296.0330.

### Bis-3-benzo[*b*]thienylmethane

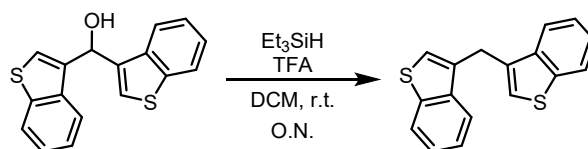

The crude product was dissolved in DCM (70 mL) and  $\text{Et}_3\text{SiH}$  (6.6 mL, 41.4 mmol) was added. The solution was cooled to 0 °C and trifluoroacetic acid (1.6 mL, 20.9 mmol) was added dropwise and stirred overnight at room temperature. The volatiles were removed *in vacuo* and crude product was passed through the pad of silica eluted with toluene to give the title compound as colorless oil.  $^1\text{H-NMR}$  ( $\text{CDCl}_3$ , 400 MHz):  $\delta$  7.90–7.85 (m, 4H), 7.77–7.73 (m, 4H), 7.02 (t,  $J = 1.2$  Hz, 2H), 4.38 (t,  $J = 1.2$  Hz, 2H) ppm. HR-FAB-MASS ( $m/z$ ): calculated for  $\text{C}_{17}\text{H}_{12}\text{S}_2$  [ $\text{M}$ ] $^+$ ; 280.0380, observed; 280.0383.

### Bis-3-(2-bromobenzo[*b*]thienyl)methane

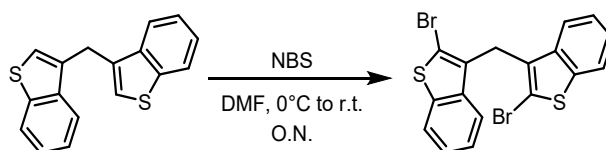

The crude product was dissolved in DMF (160 mL) and the solution was cooled to 0 °C. NBS (7.24 g, 40.7 mmol) was added portionwise at the same temperature and stirred overnight at room temperature. The volatiles were removed *in vacuo* and the residue was washed with ethanol, and the solid was filtered to give the title compound as colorless solid (6.27 g, 14.3 mmol, 75% over 3 steps).  $^1\text{H-NMR}$  ( $\text{CDCl}_3$ , 400 MHz):  $\delta$  7.68–7.65 (m, 2H), 7.57–7.54 (m, 2H), 7.26–7.18 (m, 4H), 4.43 (s, 2H) ppm;  $^{13}\text{C-NMR}$  ( $\text{CDCl}_3$ , 100 MHz):  $\delta$  139.6, 138.1, 131.6, 124.7, 124.6, 122.0, 121.7, 114.7, 28.1 ppm. HR-FAB-MASS ( $m/z$ ): calculated for  $\text{C}_{17}\text{H}_{12}\text{Br}_2\text{S}_2$  [ $\text{M}$ ] $^+$ ; 435.8591, observed; 435.8596.

### Bis[1]benzothieno[2,3-*b*:3',2'-*e*]cyclohexastanane (**2c**)

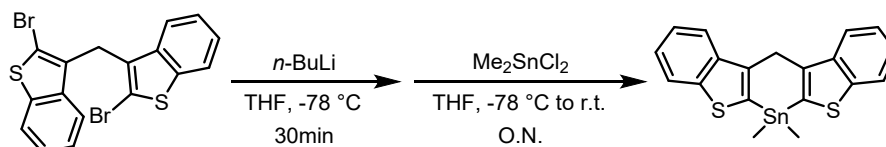

To a solution of bis-3-(2-bromobenzo[*b*]thienyl)methane (1.50 g, 3.42 mmol) in Et<sub>2</sub>O (80 mL) was added *n*-BuLi (1.6 M in hexane, 4.5 mL, 7.2 mmol) dropwise at -78 °C and the mixture was stirred for 30 min at the same temperature. Then, dimethyltin dichloride (0.843 g, 3.84 mmol) in Et<sub>2</sub>O (5 mL) was added dropwise into the mixture at the same temperature, and the mixture was warmed to room temperature. After stirring at room temperature overnight, the mixture was quenched with sat. NH<sub>4</sub>Cl aq. and extracted with DCM. The extracts were dried over anhydrous Na<sub>2</sub>SO<sub>4</sub> and after filtration, the volatiles were removed *in vacuo*. The crude product was washed with ethanol to give the title compounds as colorless solid (1.14 g, 2.68 mmol, 78%). <sup>1</sup>H-NMR (CDCl<sub>3</sub>, 400 MHz): δ 8.00 (d, *J* = 7.9, 2H), 7.94 (d, *J* = 8.0, 2H), 7.49–7.45 (m, 2H), 7.40–7.36 (m, 2H), 4.69 (s, 2H), 0.66 (s, 6H) ppm; <sup>13</sup>C-NMR (CDCl<sub>3</sub>, 100 MHz): δ 143.9, 139.8, 139.0, 129.1, 124.2, 123.9, 122.4, 121.1, 29.8, -6.7 ppm. HR-FAB-MASS (*m/z*): calculated for C<sub>19</sub>H<sub>17</sub>S<sub>2</sub>Sn [M+H]<sup>+</sup>; 428.9788, observed; 428.9800.

Bis[1]benzothieno[2,3-*b*:3',2'-*e*]arsinine (**3c**)

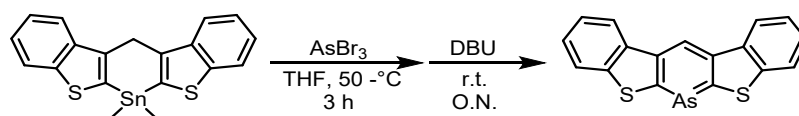

To a solution of **2c** (1.47 g, 3.44 mmol) in THF (35 mL) was added arsenic tribromide (1.14 g, 3.62 mmol) and the mixture was stirred for 3 h at 50 °C. Then, DBU (1.6 mL, 11 mmol) was added into the mixture at room temperature, and stirred overnight. the volatiles were removed *in vacuo*. The crude product was washed with ethanol in air to give the title compounds as red solid (0.810 g, 2.30 mmol, 67%). <sup>1</sup>H-NMR (CDCl<sub>3</sub>, 400 MHz): δ 9.32 (s, 1H), 8.47–8.42 (m, 2H), 7.95–7.7.91 (m, 2H), 7.59–7.52 (m, 4H) ppm; <sup>13</sup>C-NMR (CDCl<sub>3</sub>, 100 MHz): δ 174.5, 141.5, 137.0, 136.1, 127.2, 124.5, 122.3, 121.4, 116.6 ppm. HR-FAB-MASS (*m/z*): calculated for C<sub>17</sub>H<sub>9</sub>S<sub>2</sub>As [M]<sup>+</sup>; 351.9362, observed; 351.9361.

Bis[1]benzothieno[2,3-*b*:3',2'-*e*]cyclohexastanane (**2d**)

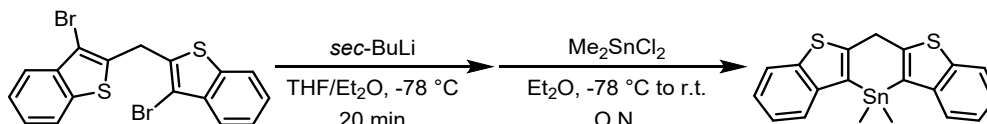

To a solution of bis-2-(3-bromobenzo[*b*]thienyl)methane (0.51 g, 1.16 mmol) in THF (17 mL) and Et<sub>2</sub>O (100 mL) was added *sec*-BuLi (1.3 M in hexane, 3.58 mL, 4.65 mmol) dropwise at -78 °C and the mixture was stirred for 20 min at the same temperature. Then, dimethyltin dichloride (0.387 g, 1.76 mmol) in Et<sub>2</sub>O (3.5 mL) was added dropwise into the mixture at the

same temperature, and the mixture was stirred for 1 h and warmed to room temperature. After stirring at room temperature overnight, the mixture was quenched with sat.  $\text{NH}_4\text{Cl}$  aq. and extracted with DCM. The extracts were dried over anhydrous  $\text{Na}_2\text{SO}_4$  and after filtration, the volatiles were removed *in vacuo*. The crude product was washed with ethanol to give the title compounds as colorless solid (0.243 g, 0.568 mmol, 49%).  $^1\text{H-NMR}$  ( $\text{CDCl}_3$ , 400 MHz):  $\delta$  7.93–7.83 (m, 2H), 7.68 (d,  $J = 7.4$ , 2H), 7.40–7.31 (m, 4H), 4.81 (s, 2H), 0.67 (s, 6H). ppm;  $^{13}\text{C-NMR}$  ( $\text{CDCl}_3$ , 100 MHz):  $\delta$  146.7, 145.2, 139.8, 129.3, 124.3, 124.2, 124.1, 122.1, 33.3, –8.6 ppm. HR-FAB-MASS (m/z): calculated for  $\text{C}_{19}\text{H}_{17}\text{S}_2\text{Sn}$   $[\text{M}+\text{H}]^+$ ; 428.9788, observed; 428.9787.

Bis[1]benzothieno[2,3-*b*:3',2'-*e*]arsinine (**3d**)

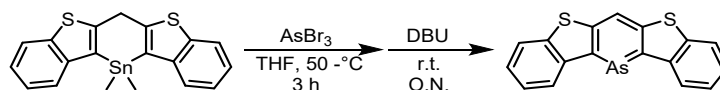

To a solution of **2c** (0.105 g, 0.245 mmol) in THF (2 mL) was added arsenic tribromide (84.8 mg, 0.267 mmol) and the mixture was stirred for 3 h at 50 °C. Then, DBU (0.11 mL, 7.4 mmol) was added into the mixture at room temperature, and stirred overnight. the volatiles were removed *in vacuo*. The crude product was washed with ethanol in air to give the title compounds as red solid (61.8 mg, 0.176 mmol, 72%).  $^1\text{H-NMR}$  ( $\text{CDCl}_3$ , 400 MHz):  $\delta$  8.58 (s, 1H), 8.55–8.53 (m, 2H), 7.89–7.86 (m, 2H), 7.54–7.45 (m, 4H) ppm;  $^{13}\text{C-NMR}$  ( $\text{CDCl}_3$ , 100 MHz):  $\delta$  166.0, 142.5, 142.0, 138.3, 127.7, 124.8, 122.7, 122.5, 119.2 ppm. HR-FAB-MASS (m/z): calculated for  $\text{C}_{17}\text{H}_9\text{S}_2\text{As}$   $[\text{M}]^+$ ; 351.9362, observed; 351.9361.

Bis[1]benzothieno[2,3-*b*:3',2'-*e*]arsinine (**3c**)

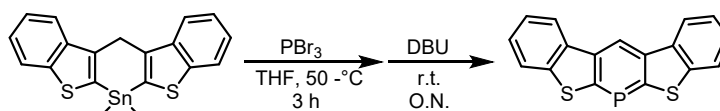

To a solution of **2c** (0.65 g, 1.52 mmol) in THF (8 mL) was added phosphorus tribromide (1.0 M, 1.67 mL, 1.67 mmol) and the mixture was stirred for 3 h at 50 °C. Then, DBU (1.14 mL, 7.62 mmol) was added into the mixture at room temperature, and stirred overnight. the volatiles were removed *in vacuo*. The crude product was washed with ethanol in air to give the title compounds as yellow solid (0.275 g, 0.90 mmol, 59%).  $^1\text{H-NMR}$  ( $\text{CDCl}_3$ , 400 MHz):  $\delta$  9.18 (d,  $J = 4.1$  Hz, 1H), 8.45–8.41 (m, 2H), 7.95–7.91 (m, 2H), 7.59–7.54 (m, 4H) ppm;  $^{13}\text{C-NMR}$  ( $\text{CDCl}_3$ , 100 MHz):  $\delta$  165.0, 164.4, 141.2, 136.5, 127.6, 124.7, 122.6, 122.6, 121.7, 116.9, 116.7 ppm.  $^{31}\text{P-NMR}$  ( $\text{CDCl}_3$ , 162 MHz):  $\delta$  151.4 ppm. EI-MASS (m/z): calculated for  $\text{C}_{17}\text{H}_9\text{S}_2\text{P}$   $[\text{M}]^+$ ; 307.9883, observed; 307.9892.

### General procedure of reaction with DMAD.

To a solution of arsinines in benzene (**3a**, **3b**) or toluene (**3c**, **3d**) was added DMAD (1.1 eq.) at 80 °C and the mixture was stirred for overnight. The volatiles were removed *in vacuo*. The crude product was purified by silica gel column chromatography (hexane: EtOAc = 5: 1) to give the title compounds.

**3a-DMAD:** **3a** (50 mg, 0.20 mmol) and DMAD (26.7  $\mu$ L, 0.218 mmol) were used. The product was obtained as colorless solid (60.2 mg, 0.153 mmol, 77%).  $^1\text{H-NMR}$  ( $\text{CDCl}_3$ , 400 MHz):  $\delta$  7.23–7.20 (m, 4H), 6.08 (s, 1H), 3.80 (s, 3H), 3.79 (s, 3H) ppm;  $^{13}\text{C-NMR}$  ( $\text{CDCl}_3$ , 100 MHz):  $\delta$  168.4, 165.9, 155.1, 154.2, 152.5, 142.4, 129.0, 125.1, 52.8, 52.6, 49.6 ppm. HR-FAB-MASS (m/z): calculated for  $\text{C}_{15}\text{H}_{11}\text{O}_4\text{S}_2\text{As}$   $[\text{M}]^+$ ; 393.9315, observed; 393.9313.

**3b-DMAD:** **3b** (50 mg, 0.20 mmol) and DMAD (26.7  $\mu$ L, 0.218 mmol) were used. The product was obtained as colorless solid (56.8 mg, 0.144 mmol, 73%).  $^1\text{H-NMR}$  ( $\text{CDCl}_3$ , 400 MHz):  $\delta$  7.22 (d,  $J = 4.9$  Hz, 2H), 6.96 (d,  $J = 4.9$  Hz, 2H), 6.19 (s, 1H), 3.80 (s, 3H), 3.79 (s, 3H) ppm;  $^{13}\text{C-NMR}$  ( $\text{CDCl}_3$ , 100 MHz):  $\delta$  169.4, 164.5, 157.9, 152.1, 150.0, 144.9, 128.7, 122.6, 52.9, 52.5, 46.7 ppm. HR-FAB-MASS (m/z): calculated for  $\text{C}_{15}\text{H}_{12}\text{O}_4\text{S}_2\text{As}$   $[\text{M}+\text{H}]^+$ ; 394.9394, observed; 394.9398.

**3c-DMAD:** **3c** (50 mg, 0.14 mmol) and DMAD (17.7  $\mu$ L, 0.145 mmol) were used. The product was obtained as colorless solid (58.0 mg, 0.116 mmol, 83%).  $^1\text{H-NMR}$  ( $\text{CDCl}_3$ , 400 MHz):  $\delta$  8.09 (d,  $J = 8.1$  Hz, 2H), 7.79 (d,  $J = 8.1$  Hz, 2H), 7.46–7.42 (m, 2H), 7.35–7.31 (m, 2H), 6.88 (s, 1 H), 3.80 (s, 3H), 3.79 (s, 3H) ppm;  $^{13}\text{C-NMR}$  ( $\text{CDCl}_3$ , 100 MHz):  $\delta$  165.3, 156.1, 150.8, 148.5, 145.8, 143.8, 135.7, 125.0, 124.7, 123.1, 120.9, 53.0, 52.7, 45.3 ppm. HR-FAB-MASS (m/z): calculated for  $\text{C}_{17}\text{H}_9\text{S}_2\text{As}$   $[\text{M}]^+$ ; 493.9628, observed; 493.9621.

**3d-DMAD:** **3d** (50 mg, 0.14 mmol) and DMAD (17.7  $\mu$ L, 0.145 mmol) were used. The product was obtained as colorless solid (50.3 mg, 0.100 mmol, 72%).  $^1\text{H-NMR}$  ( $\text{CDCl}_3$ , 400 MHz):  $\delta$  7.93 (ddd,  $J = 0.7, 1.1, 8.0$  Hz, 2H), 7.77 (dt,  $J = 0.9, 8.1$  Hz, 2H), 7.34–7.44 (m, 2H), 7.27–7.34 (m, 2H), 6.27 (s, 1H), 3.82 (s, 3H), 3.80 (s, 3H). ppm;  $^{13}\text{C-NMR}$  ( $\text{CDCl}_3$ , 100 MHz):  $\delta$  168.8, 164.4, 156.5, 153.7, 150.5, 140.9, 140.2, 139.7, 124.9, 124.6, 123.0, 122.8, 53.0, 52.6, 48.3 ppm. HR-FAB-MASS (m/z): calculated for  $\text{C}_{17}\text{H}_9\text{S}_2\text{As}$   $[\text{M}]^+$ ; 493.9628, observed; 493.9639.



### General procedure of reaction with *o*-benzyne

To a solution of arsinines in THF (**3a**, **3c**) (2 mL) was added 2-TMS-benzenetriflate followed by TBAF (1.0 M in THF) at 80 °C and the mixture was stirred for overnight. The volatiles were removed *in vacuo*. The crude product was purified by silica gel column chromatography (hexane) to give the title compounds.

**3a-benzyne:** **3a** (50 mg, 0.20 mmol), 2-TMS-benzenetriflate (35.1  $\mu$ L, 0.145 mmol), and TBAF solution (1.0 M in THF, 0.15 mL, 0.15 mmol) were used. The product was obtained as colorless solid (50.4 mg, 0.115 mmol, 82%).  $^1\text{H-NMR}$  ( $\text{CDCl}_3$ , 400 MHz):  $\delta$  7.69 (d,  $J = 7.1$  Hz, 1H), 7.46 (d,  $J = 7.3$  Hz, 1H), 7.20 (d,  $J = 4.7$  Hz, 2H), 7.15 (d,  $J = 4.7$  Hz, 2H), 7.11 (td,  $J = 7.4, 1.2$  Hz, 1H), 6.98 (td,  $J = 7.4, 1.2$  Hz, 1H) 5.88 (s, 1H) ppm;  $^{13}\text{C-NMR}$  ( $\text{CDCl}_3$ , 100 MHz):  $\delta$  154.9, 148.3, 145.8, 142.6, 131.6, 128.0, 127.9, 126.4, 125.1, 124.5, 52.7 ppm. HR-FAB-MASS (m/z): calculated for  $\text{C}_{15}\text{H}_9\text{S}_2\text{As}$   $[\text{M}]^+$ ; 327.9362, observed; 327.9367.

**3c-benzyne:** **3c** (50 mg, 0.14 mmol), 2-TMS-benzenetriflate (50.5  $\mu$ L, 0.208 mmol), and TBAF solution (1.0 M in THF, 0.24 mL, 0.24 mmol) were used. The product was obtained as colorless solid (50.4 mg, 0.118 mmol, 83%).  $^1\text{H-NMR}$  ( $\text{CDCl}_3$ , 400 MHz):  $\delta$  8.11 (d,  $J = 8.1$  Hz, 2H), 7.78–7.75 (m, 3H), 7.62 (dd,  $J = 7.3, 1.0$  Hz, 1H), 7.45–7.41 (m, 2H), 7.31–7.27 (m, 2H), 7.13 (td,  $J = 7.4, 1.3$  Hz, 1H), 7.01 (td,  $J = 7.3, 1.2$  Hz, 1H), 6.53 (s, 1H) ppm;  $^{13}\text{C-NMR}$  ( $\text{CDCl}_3$ , 100 MHz):  $\delta$  148.7, 147.1, 146.1, 145.3, 143.5, 136.0, 131.9, 128.2, 126.3, 124.8, 124.6, 124.3, 123.0, 120.5, 48.0 ppm. HR-FAB-MASS (m/z): calculated for  $\text{C}_{23}\text{H}_{13}\text{S}_2\text{As}$   $[\text{M}]^+$ ; 427.9675, observed; 427.9686.

### **3c-W(CO)<sub>5</sub>**

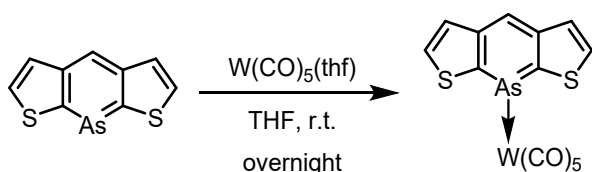

To a solution of  $\text{W(CO)}_5(\text{thf})$  prepared by the UV irradiation of solution of  $\text{W(CO)}_5$  (98.0 mg, 0.278 mmol) in THF (10 mL) was added **3c** (70.0 mg, 0.278 mmol) and the mixture was stirred overnight. The volatiles were removed *in vacuo* and the crude product was recrystallization from THF/ethanol in argon-filled glovebox to give the title compounds as red solid (115 mg, 0.200 mmol, 72%).  $^1\text{H-NMR}$  ( $\text{THF-}d_6$ , 400 MHz):  $\delta$  8.73 (s, 1H), 7.86 (d,  $J = 5.3$  Hz, 2H), 7.70 (d,  $J = 5.3$  Hz, 2H) ppm;  $^{13}\text{C-NMR}$  ( $\text{THF-}d_6$ , 100 MHz):  $\delta$  199.0, 191.3, 171.8, 141.4, 129.6, 126.9, 122.4 ppm. HR-FAB-MASS (m/z): calculated for  $\text{C}_{14}\text{H}_5\text{O}_5\text{S}_2\text{AsW}$   $[\text{M}]^+$ ; 575.8304, observed; 575.8303.

### 3d'

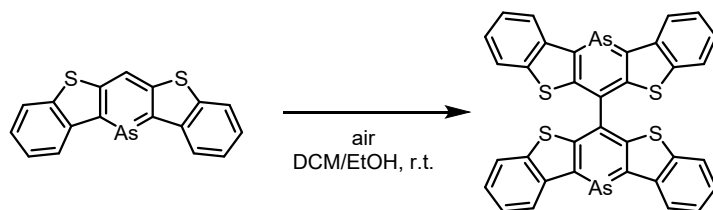

Solution of **3d** was dissolved in DCM and ethanol was layered on the solution. The mixture was left for 2 days to give the brown needle crystals.  $^1\text{H-NMR}$  ( $\text{CDCl}_3$ , 400 MHz):  $\delta$  8.69–8.67 (m, 4H), 7.68–7.65 (m, 4H), 7.54–7.45 (m, 8H) ppm; HR-FAB-MASS ( $m/z$ ): calculated for  $\text{C}_{34}\text{H}_{16}\text{S}_4\text{As}_2$   $[\text{M}]^+$ ; 701.8567, observed; 701.8579.

### 3d-P'

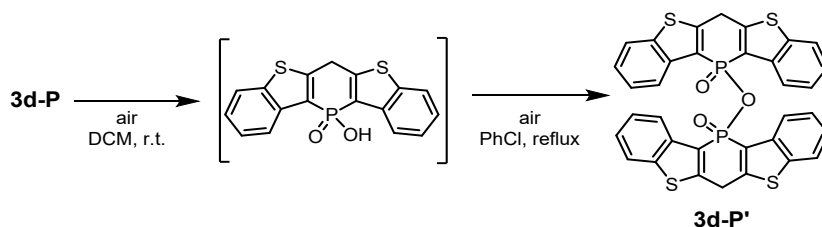

Solution of **3d-P** was dissolved in DCM and left for overnight to give the insoluble yellow powder, which was phosphinic acid. MALDI-TOF MS ( $m/z$ ): calculated for  $\text{C}_{17}\text{H}_9\text{O}_2\text{S}_2\text{P}$   $[\text{M}-\text{H}]^-$ ; 340.9865 observed; 340.9873.

The powder was dissolved by hot chlorobenzene and cooled to ambient temperature to give the yellow crystal. MALDI-TOF MS ( $m/z$ ): calculated for  $\text{C}_{34}\text{H}_{20}\text{O}_3\text{NaS}_4\text{P}_2$   $[\text{M}+\text{Na}]^+$ ; 688.9663, observed; 688.9650

#### 4. X-ray diffraction analysis

The single crystal was mounted on a glass fiber. Intensity data were collected at 100 K on a Rigaku XtaLAB mini with graphite-monochromated Mo  $K\alpha$  radiation. Readout was performed in 0.073 mm pixel mode. The data were collected to a maximum  $2\theta$  value of 52.7°. Data were processed using CrysAlisPro.<sup>[6]</sup> An analytical numeric absorption correction<sup>[7]</sup> was applied. The data were corrected for Lorentz and polarization effects. The structure was solved by the ShelXT<sup>[8]</sup> and expanded using Fourier techniques. Non-hydrogen atoms were refined anisotropically. Hydrogen atoms were refined using the riding model. The final cycle of full-matrix least-squares refinement on  $F^2$  was based on observed reflections and variable parameters. All calculations were performed using the Olex2<sup>[9]</sup> crystallographic software package except for refinement, which was performed using SHELXL2016.<sup>[10]</sup>

Deposition Number 2385300 (**3a**), 2385301 (**3b**), 2385302 (**3c**), 2385303 (**3d**-plate), 2385304 (**3d**-needle), 2385305 (**3c-P**), 2385306 (**3b-DMAD**), 2385307 (**3c-DMAD**), 2385308 (**3c-benzyne**), 2385309 (**3a-WO(CO)<sub>5</sub>**), 2385310 (**3d'**), and 2385311 (**3d-P'**) contain the supplementary crystallographic data for this paper. These data are provided free of charge by the joint Cambridge Crystallographic Data Centre and Fachinformationszentrum Karlsruhe Access Structures service [www.ccdc.cam.ac.uk/structures](http://www.ccdc.cam.ac.uk/structures).

**Table S1.** Crystallographic Data of **3a-c**.

|                                     | <b>3a</b>                                      | <b>3b</b>                                      | <b>3c</b>                                       |
|-------------------------------------|------------------------------------------------|------------------------------------------------|-------------------------------------------------|
| Crystal data                        |                                                |                                                |                                                 |
| Empirical formula                   | C <sub>9</sub> H <sub>5</sub> AsS <sub>2</sub> | C <sub>9</sub> H <sub>5</sub> AsS <sub>2</sub> | C <sub>17</sub> H <sub>9</sub> AsS <sub>2</sub> |
| Formula weight                      | 252.17                                         | 252.17                                         | 352.28                                          |
| Crystal size / mm <sup>3</sup>      | 0.848×0.236×0.192                              | 0.848×0.477×0.289                              | 0.514×0.392×0.098                               |
| Crystal system                      | monoclinic                                     | monoclinic                                     | monoclinic                                      |
| Space group                         | P2 <sub>1</sub> /n                             | Pn                                             | C2/c                                            |
| a / Å                               | 10.5045(11)                                    | 6.1248(3)                                      | 13.4892(12)                                     |
| b / Å                               | 6.2032(5)                                      | 11.3296(6)                                     | 8.5408(7)                                       |
| c / Å                               | 13.9819(13)                                    | 12.9122(7)                                     | 23.219(2)                                       |
| α / °                               | 90                                             | 90                                             | 90                                              |
| β / °                               | 102.093(10)                                    | 95.535(6)                                      | 97.422(9)                                       |
| γ / °                               | 90                                             | 90                                             | 90                                              |
| Volume / Å <sup>3</sup>             | 890.86(15)                                     | 891.82(8)                                      | 2652.6(4)                                       |
| ρ <sub>calc</sub> g/cm <sup>3</sup> | 1.880                                          | 1.878                                          | 1.764                                           |
| Z                                   | 4                                              | 4                                              | 8                                               |
| F(000)                              | 496                                            | 496                                            | 1408                                            |
| Data Collection                     |                                                |                                                |                                                 |
| Temperature /K                      | 197.15                                         | 100                                            | 100                                             |
| 2θmax / °                           | 52.744                                         | 55.114                                         | 52.74                                           |
| Tmin/Tmax                           | 0.261/0.476                                    | 0.588/0.766                                    | 0.888/0.966                                     |
| Refinement                          |                                                |                                                |                                                 |
| No. of Observed Data                | 1822                                           | 2998                                           | 2691                                            |
| No. of Parameters                   | 109                                            | 316                                            | 181                                             |
| R1 <sup>a</sup> , wR2 <sup>b</sup>  | 0.0363, 0.1018                                 | 0.0299, 0.0737                                 | 0.0461, 0.1027                                  |
| Goodness of Fit Indicator           | 1.079                                          | 1.037                                          | 0.993                                           |

<sup>a</sup>R1 =  $\sum ||F_o| - |F_c|| / \sum |F_o|$     <sup>b</sup>wR2 =  $[\sum w ((F_o^2 - F_c^2)^2) / \sum w (F_o^2)^2]^{1/2}$      $w = [\sigma^2(F_o^2)]^{-1}$   
 CCDC 2385300 (**3a**), 2385301 (**3b**), 2385302 (**3c**).

**Table S2** Crystallographic Data of **3d-plate**, **3d-needle**, and **3c-P**.

|                                     | <b>3d-plate</b>                                 | <b>3d-needle</b>                                | <b>3c-P</b>                                    |
|-------------------------------------|-------------------------------------------------|-------------------------------------------------|------------------------------------------------|
| Crystal data                        |                                                 |                                                 |                                                |
| Empirical formula                   | C <sub>17</sub> H <sub>9</sub> AsS <sub>2</sub> | C <sub>17</sub> H <sub>9</sub> AsS <sub>2</sub> | C <sub>17</sub> H <sub>9</sub> PS <sub>2</sub> |
| Formula weight                      | 352.28                                          | 352.28                                          | 308.33                                         |
| Crystal size / mm <sup>3</sup>      | 0.347×0.19×0.077                                | 0.468×0.058×0.038                               | 0.539×0.292×0.091                              |
| Crystal system                      | monoclinic                                      | monoclinic                                      | monoclinic                                     |
| Space group                         | P2 <sub>1</sub> /c                              | P2 <sub>1</sub> /c                              | C2/c                                           |
| a / Å                               | 13.1348(11)                                     | 14.5703(9)                                      | 13.2423(8)                                     |
| b / Å                               | 8.5422(5)                                       | 3.9421(3)                                       | 8.4253(6)                                      |
| c / Å                               | 12.1986(10)                                     | 23.8017(18)                                     | 23.5820(15)                                    |
| α / °                               | 90                                              | 90                                              | 90                                             |
| β / °                               | 93.983(8)                                       | 99.317(7)                                       | 97.092(6)                                      |
| γ / °                               | 90                                              | 90                                              | 90                                             |
| Volume / Å <sup>3</sup>             | 1365.38(18)                                     | 1349.08(17)                                     | 2610.9(3)                                      |
| ρ <sub>calc</sub> g/cm <sup>3</sup> | 1.714                                           | 1.734                                           | 1.569                                          |
| Z                                   | 4                                               | 4                                               | 8                                              |
| F(000)                              | 704                                             | 704                                             | 1264                                           |
| Data Collection                     |                                                 |                                                 |                                                |
| Temperature / K                     | 100                                             | 100.00                                          | 100.00                                         |
| 2θmax / °                           | 52.738                                          | 52.744                                          | 52.74                                          |
| Tmin/Tmax                           | 0.904/0.974                                     | 0.864/0.976                                     | 0.984/0.997                                    |
| Refinement                          |                                                 |                                                 |                                                |
| No. of Observed Data                | 2805                                            | 2741                                            | 2672                                           |
| No. of Parameters                   | 350                                             | 181                                             | 181                                            |
| R1 <sup>a</sup> , wR2 <sup>b</sup>  | 0.0622, 0.1643                                  | 0.0503, 0.1369                                  | 0.0359, 0.0963                                 |
| Goodness of Fit Indicator           | 1.112                                           | 1.053                                           | 1.096                                          |

$${}^aR1 = \sum ||Fo| - |Fc|| / \sum |Fo| \quad {}^bwR2 = [ \sum w ((Fo^2 - Fc^2)^2 / \sum w (Fo^2)^2 )^{1/2} \quad w = [ \sigma^2(Fo^2) ]^{-1}$$

CCDC 2385303 (**3d-plate**), 2385304 (**3d-needle**), 2385305 (**3c-P**).

**Table S3** Crystallographic Data of **3a-W(CO)<sub>5</sub>**, **3b-DMAD**, and **3c-DMAD**.

|                                     | <b>3b-DMAD</b>                                                  | <b>3c-DMAD</b>                                                  | <b>3c-benzyne</b>                                |
|-------------------------------------|-----------------------------------------------------------------|-----------------------------------------------------------------|--------------------------------------------------|
| Crystal data                        |                                                                 |                                                                 |                                                  |
| Empirical formula                   | C <sub>15</sub> H <sub>11</sub> AsO <sub>4</sub> S <sub>2</sub> | C <sub>23</sub> H <sub>15</sub> AsO <sub>4</sub> S <sub>2</sub> | C <sub>23</sub> H <sub>13</sub> AsS <sub>2</sub> |
| Formula weight                      | 394.28                                                          | 494.39                                                          | 428.37                                           |
| Crystal size / mm <sup>3</sup>      | 0.514×0.149×0.137                                               | 0.547×0.285×0.083                                               | 0.54×0.33×0.15                                   |
| Crystal system                      | monoclinic                                                      | orthorhombic                                                    | monoclinic                                       |
| Space group                         | P2 <sub>1</sub> /c                                              | Pnma                                                            | I2/a                                             |
| a / Å                               | 10.4030(4)                                                      | 17.8326(12)                                                     | 16.1897(5)                                       |
| b / Å                               | 14.0494(5)                                                      | 7.7360(6)                                                       | 7.1373(3)                                        |
| c / Å                               | 10.7101(4)                                                      | 30.2340(15)                                                     | 31.4478(9)                                       |
| α / °                               | 90                                                              | 90                                                              | 90                                               |
| β / °                               | 99.246(3)                                                       | 90                                                              | 90.732(3)                                        |
| γ / °                               | 90                                                              | 90                                                              | 90                                               |
| Volume / Å <sup>3</sup>             | 1545.01(10)                                                     | 4170.9(5)                                                       | 3633.5(2)                                        |
| ρ <sub>calc</sub> g/cm <sup>3</sup> | 1.695                                                           | 1.575                                                           | 1.566                                            |
| Z                                   | 4                                                               | 8                                                               | 8                                                |
| F(000)                              | 792                                                             | 2000                                                            | 1728                                             |
| Data Collection                     |                                                                 |                                                                 |                                                  |
| Temperature / K                     | 100.00                                                          | 100.00                                                          | 100.00                                           |
| 2θ <sub>max</sub> / °               | 52.74                                                           | 52.738                                                          | 52.746                                           |
| T <sub>min</sub> /T <sub>max</sub>  | 0.019/0.095                                                     | 0.910/0.977                                                     | 0.015/0.122                                      |
| Refinement                          |                                                                 |                                                                 |                                                  |
| No. of Observed Data                | 3150                                                            | 5488                                                            | 3705                                             |
| No. of Parameters                   | 201                                                             | 546                                                             | 235                                              |
| R1 <sup>a</sup> , wR2 <sup>b</sup>  | 0.0328, 0.0931                                                  | 0.0412, 0.0990                                                  | 0.0345, 0.0919                                   |
| Goodness of Fit Indicator           | 1.034                                                           | 1.056                                                           | 1.084                                            |

<sup>a</sup>R1 =  $\sum ||F_o| - |F_c|| / \sum |F_o|$     <sup>b</sup>wR2 =  $[\sum w ((F_o^2 - F_c^2)^2) / \sum w (F_o^2)^2]^{1/2}$      $w = [\sigma^2(F_o^2)]^{-1}$   
 CCDC 2385306 (**3b-DMAD**), 2385307 (**3c-DMAD**), 2385308 (**3c-benzyne**).

**Table S4** Crystallographic Data of **3c-benzyne**, **3d'**, and **3d-P'**.

|                                     | <b>3a-W(CO)<sub>5</sub></b>                                      | <b>3d'</b>                                                     | <b>3d-P'</b>                                                                 |
|-------------------------------------|------------------------------------------------------------------|----------------------------------------------------------------|------------------------------------------------------------------------------|
| Crystal data                        |                                                                  |                                                                |                                                                              |
| Empirical formula                   | C <sub>14</sub> H <sub>5</sub> AsO <sub>5</sub> S <sub>2</sub> W | C <sub>34</sub> H <sub>16</sub> As <sub>2</sub> S <sub>4</sub> | C <sub>34</sub> H <sub>20</sub> O <sub>3</sub> P <sub>2</sub> S <sub>4</sub> |
| Formula weight                      | 576.07                                                           | 702.55                                                         | 666.68                                                                       |
| Crystal size / mm <sup>3</sup>      | 0.423×0.282×0.091                                                | 0.608×0.129×0.055                                              | 0.45×0.14×0.07                                                               |
| Crystal system                      | triclinic                                                        | triclinic                                                      | triclinic                                                                    |
| Space group                         | P-1                                                              | P-1                                                            | P-1                                                                          |
| a /Å                                | 7.3180(12)                                                       | 8.0954(6)                                                      | 7.4187(3)                                                                    |
| b /Å                                | 10.2845(16)                                                      | 11.3660(7)                                                     | 13.2453(5)                                                                   |
| c /Å                                | 11.3383(10)                                                      | 15.4655(8)                                                     | 17.9755(7)                                                                   |
| α /°                                | 92.150(10)                                                       | 87.822(5)                                                      | 77.315(3)                                                                    |
| β /°                                | 107.144(11)                                                      | 85.309(5)                                                      | 81.898(4)                                                                    |
| γ /°                                | 100.322(13)                                                      | 80.114(6)                                                      | 76.885(4)                                                                    |
| Volume /Å <sup>3</sup>              | 798.5(2)                                                         | 1396.77(16)                                                    | 1670.53(12)                                                                  |
| ρ <sub>calc</sub> g/cm <sup>3</sup> | 2.396                                                            | 1.670                                                          | 1.325                                                                        |
| Z                                   | 2                                                                | 2                                                              | 2                                                                            |
| F(000)                              | 536                                                              | 700                                                            | 684                                                                          |
| Data Collection                     |                                                                  |                                                                |                                                                              |
| Temperature /K                      | 100                                                              | 100.00                                                         | 180.15                                                                       |
| 2θmax /°                            | 52.906                                                           | 52.746                                                         | 152.766                                                                      |
| Tmin/Tmax                           | 0/1                                                              | 0.811/0.968                                                    | 0.231/0.739                                                                  |
| Refinement                          |                                                                  |                                                                |                                                                              |
| No. of Observed Data                | 3159                                                             | 5695                                                           | 6406                                                                         |
| No. of Parameters                   | 208                                                              | 361                                                            | 388                                                                          |
| R1 <sup>a</sup> , wR2 <sup>b</sup>  | 0.0783, 0.2094                                                   | 0.0421, 0.1076                                                 | 0.1064, 0.3047                                                               |
| Goodness of Fit Indicator           | 1.025                                                            | 1.016                                                          | 1.048                                                                        |

<sup>a</sup>R1 =  $\sum ||F_o| - |F_c|| / \sum |F_o|$     <sup>b</sup>wR2 =  $[\sum w ((F_o^2 - F_c^2)^2) / \sum w (F_o^2)^2]^{1/2}$      $w = [\sigma^2(F_o^2)]^{-1}$   
 CCDC 2385309 (**3a-WO(CO)<sub>5</sub>**), 2385310 (**3d'**), 2385311 (**3d-P'**).

**Table S5.** ORTEP drawing (ellipsoids at 50% probability), and selected bond lengths and angles of **3a**. All hydrogens of the ligands are omitted for clarity.

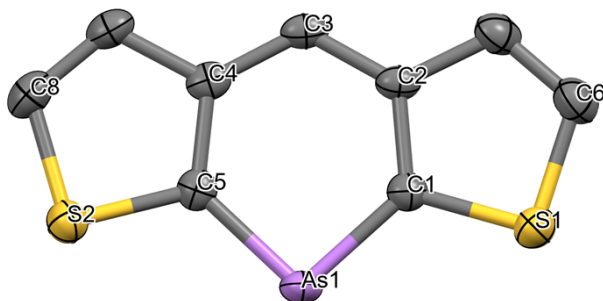

| Distances (Å) |       |          | Angles (°) |       |       |          |
|---------------|-------|----------|------------|-------|-------|----------|
| Atom1         | Atom2 | Length   | Atom1      | Atom2 | Atom3 | Angle    |
| As1           | C1    | 1.860(3) | C1         | As1   | C5    | 94.7(1)  |
| As1           | C5    | 1.859(3) | As1        | C1    | C2    | 127.1(2) |
| C1            | C2    | 1.422(4) | C1         | C2    | C3    | 124.1(3) |
| C2            | C3    | 1.393(5) | C2         | C3    | C4    | 123.2(3) |
| C3            | C4    | 1.407(4) | C3         | C4    | C5    | 123.7(3) |
| C4            | C5    | 1.424(4) | C4         | C5    | As1   | 127.1(2) |
| S1            | C1    | 1.728(3) | C1         | S1    | C6    | 91.9(2)  |
| S1            | C6    | 1.736(4) | C5         | S2    | C8    | 92.2(2)  |
| S2            | C5    | 1.738(3) |            |       |       |          |
| S2            | C8    | 1.727(4) |            |       |       |          |



**Table S6.** ORTEP drawing (ellipsoids at 50% probability), and selected bond lengths and angles of **3b**. All hydrogens of the ligands are omitted for clarity. The major part was shown.

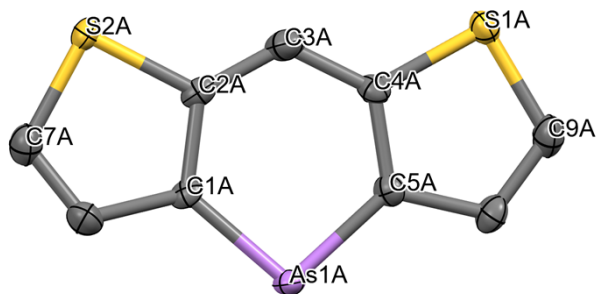

| Distances (Å) |       |         | Angles (°) |       |       |          |
|---------------|-------|---------|------------|-------|-------|----------|
| Atom1         | Atom2 | Length  | Atom1      | Atom2 | Atom3 | Angle    |
| As1A          | C1A   | 1.88(2) | C1A        | As1A  | C5A   | 96.8(6)  |
| As1A          | C5A   | 1.87(1) | As1A       | C1A   | C2A   | 124(1)   |
| C1A           | C2A   | 1.41(2) | C1A        | C2A   | C3A   | 126(1)   |
| C2A           | C3A   | 1.36(1) | C2A        | C3A   | C4A   | 125.1(9) |
| C3A           | C4A   | 1.37(2) | C3A        | C4A   | C5A   | 125(1)   |
| C4A           | C5A   | 1.41(2) | C4A        | C5A   | As1A  | 124(1)   |
| S2A           | C2A   | 1.75(1) | C2A        | S2A   | C7A   | 91.2(6)  |
| S2A           | C7A   | 1.73(2) | C4A        | S1A   | C9A   | 91.7(6)  |
| S1A           | C4A   | 1.75(1) |            |       |       |          |
| S1A           | C9A   | 1.73(2) |            |       |       |          |

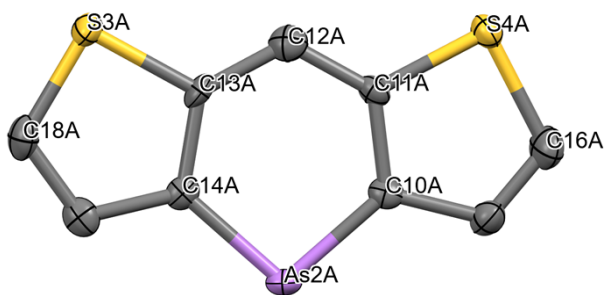

| Distances (Å) |       |         | Angles (°) |       |       |         |
|---------------|-------|---------|------------|-------|-------|---------|
| Atom1         | Atom2 | Length  | Atom1      | Atom2 | Atom3 | Angle   |
| As2A          | C10A  | 1.86(2) | C10A       | As2A  | C14A  | 97.7(6) |
| As2A          | C14A  | 1.87(1) | As2A       | C10A  | C11A  | 124(1)  |
| C10A          | C11A  | 1.42(2) | C10A       | C11A  | C12A  | 126(1)  |
| C11A          | C12A  | 1.36(2) | C11A       | C12A  | C13A  | 123(1)  |
| C12A          | C13A  | 1.39(2) | C12A       | C13A  | C14A  | 127(1)  |
| C13A          | C14A  | 1.42(2) | C13A       | C14A  | As2A  | 122(1)  |
| S3A           | C13A  | 1.76(1) | C13A       | S3A   | C18A  | 91.9(7) |
| S3A           | C18A  | 1.72(2) | C11A       | S4A   | C16A  | 90.1(7) |
| S4A           | C11A  | 1.76(2) |            |       |       |         |
| S4A           | C16A  | 1.80(2) |            |       |       |         |

**Table S7.** ORTEP drawing (ellipsoids at 50% probability), and selected bond lengths and angles of **3c**. All hydrogens of the ligands are omitted for clarity.

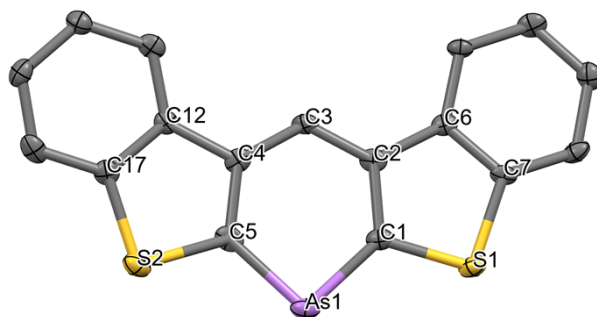

| Distances (Å) |       |          | Angles (°) |       |       |          |
|---------------|-------|----------|------------|-------|-------|----------|
| Atom1         | Atom2 | Length   | Atom1      | Atom2 | Atom3 | Angle    |
| As1           | C5    | 1.863(4) | C1         | As1   | C5    | 94.7(2)  |
| As1           | C1    | 1.853(5) | As1        | C1    | C2    | 128.0(3) |
| C1            | C2    | 1.430(6) | C1         | C2    | C3    | 122.4(4) |
| C2            | C3    | 1.398(6) | C2         | C3    | C4    | 123.9(4) |
| C3            | C4    | 1.391(7) | C3         | C4    | C5    | 124.7(4) |
| C4            | C5    | 1.421(6) | C4         | C5    | As1   | 126.2(3) |
| C5            | As1   | 1.863(4) | C1         | S1    | C7    | 92.5(2)  |
| S1            | C1    | 1.756(4) | C5         | S2    | C17   | 92.2(2)  |
| S1            | C7    | 1.757(5) |            |       |       |          |
| S2            | C5    | 1.743(5) |            |       |       |          |
| S2            | C17   | 1.762(4) |            |       |       |          |

**Table S8.** ORTEP drawing (ellipsoids at 50% probability), and selected bond lengths and angles of **3d-needle**. All hydrogens of the ligands were omitted for clarity.

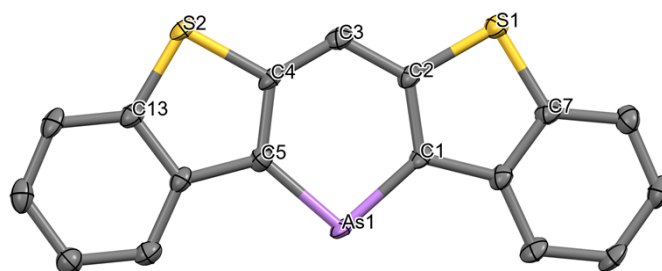

| Distances (Å) |       |          | Angles (°) |       |       |          |
|---------------|-------|----------|------------|-------|-------|----------|
| Atom1         | Atom2 | Length   | Atom1      | Atom2 | Atom3 | Angle    |
| As1           | C1    | 1.857(5) | C1         | As1   | C5    | 97.4(2)  |
| As1           | C5    | 1.859(4) | As1        | C1    | C2    | 123.7(3) |
| C1            | C2    | 1.420(7) | C1         | C2    | C3    | 126.9(4) |
| C2            | C3    | 1.392(6) | C2         | C3    | C4    | 121.2(4) |
| C3            | C4    | 1.388(7) | C3         | C4    | C5    | 126.9(4) |
| C4            | C5    | 1.415(7) | C4         | C5    | As1   | 124.0(3) |
| S1            | C2    | 1.769(5) | C2         | S1    | C7    | 91.6(2)  |
| S1            | C7    | 1.752(5) | C4         | S2    | C13   | 91.7(2)  |
| S2            | C4    | 1.763(4) |            |       |       |          |
| S2            | C13   | 1.742(5) |            |       |       |          |

**Table S9.** ORTEP drawing (ellipsoids at 50% probability), and selected bond lengths and angles of **3d-plate**. All hydrogens of the ligands are omitted for clarity. The major part was shown.

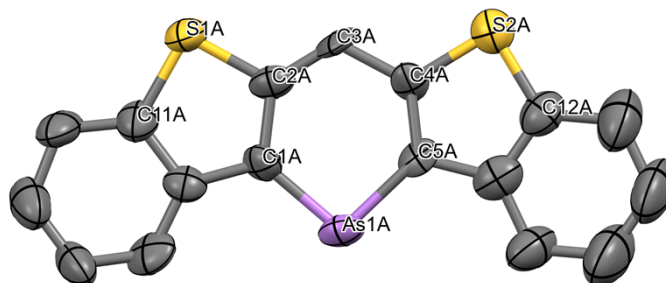

| Distances (Å) |       |         | Angles (°) |       |       |         |
|---------------|-------|---------|------------|-------|-------|---------|
| Atom1         | Atom2 | Length  | Atom1      | Atom2 | Atom3 | Angle   |
| As1A          | C1A   | 1.86(1) | C1A        | As1A  | C5A   | 96.3(8) |
| As1A          | C5A   | 1.89(2) | As1A       | C1A   | C2A   | 124(1)  |
| C1A           | C2A   | 1.44(2) | C1A        | C2A   | C3A   | 128(1)  |
| C2A           | C3A   | 1.36(2) | C2A        | C3A   | C4A   | 121(1)  |
| C3A           | C4A   | 1.47(2) | C3A        | C4A   | C5A   | 125(1)  |
| C4A           | C5A   | 1.37(3) | C4A        | C5A   | As1A  | 126(1)  |
| S1A           | C2A   | 1.75(1) | C2A        | S1A   | C11A  | 91.0(6) |
| S1A           | C11A  | 1.76(1) | C4A        | S2A   | C12A  | 90.1(5) |
| S2A           | C4A   | 1.73(1) |            |       |       |         |
| S2A           | C12A  | 1.71(1) |            |       |       |         |

**Table S10.** ORTEP drawing (ellipsoids at 50% probability), and selected bond lengths and angles of **3c-P**. All hydrogens of the ligands are omitted for clarity.

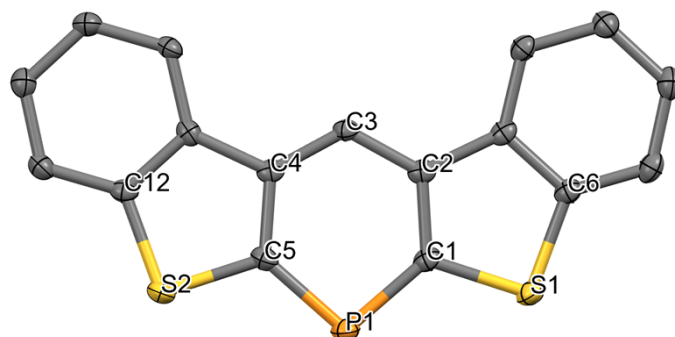

| Distances (Å) |       |          | Angles (°) |       |       |          |
|---------------|-------|----------|------------|-------|-------|----------|
| Atom1         | Atom2 | Length   | Atom1      | Atom2 | Atom3 | Angle    |
| P1            | C1    | 1.739(2) | C1         | P1    | C5    | 97.63(9) |
| P1            | C5    | 1.740(2) | P1         | C1    | C2    | 127.6(1) |
| C1            | C2    | 1.417(3) | C1         | C2    | C3    | 122.2(2) |
| C2            | C3    | 1.395(3) | C2         | C3    | C4    | 122.6(2) |
| C3            | C4    | 1.387(3) | C3         | C4    | C5    | 122.4(2) |
| C4            | C5    | 1.416(3) | C4         | C5    | P1    | 127.6(1) |
| S1            | C1    | 1.755(2) | C1         | S1    | C6    | 92.26(9) |
| S1            | C6    | 1.750(2) | C5         | S2    | C12   | 92.11(9) |
| S2            | C5    | 1.752(2) |            |       |       |          |
| S2            | C12   | 1.744(2) |            |       |       |          |

**Table S11.** ORTEP drawing (ellipsoids at 50% probability), and selected bond lengths and angles of **3b-DMAD**. All hydrogens of the ligands are omitted for clarity.

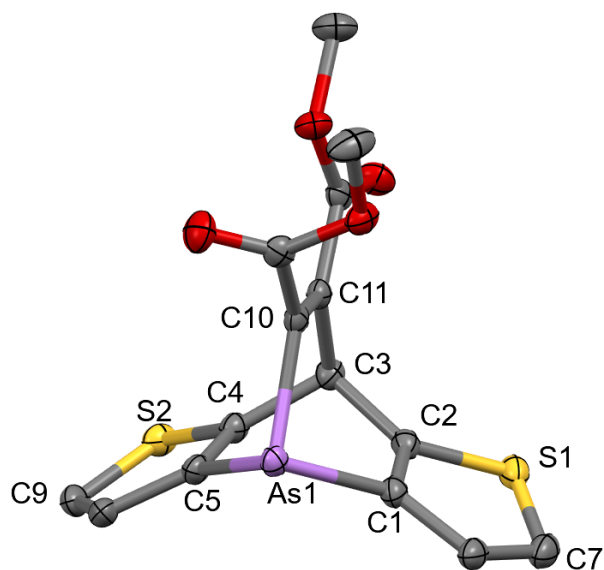

| Distances (Å) |       |          | Angles (°) |       |       |          |
|---------------|-------|----------|------------|-------|-------|----------|
| Atom1         | Atom2 | Length   | Atom1      | Atom2 | Atom3 | Angle    |
| As1           | C1    | 1.966(2) | C1         | As1   | C5    | 92.11(9) |
| As1           | C5    | 1.956(2) | As1        | C1    | C2    | 115.4(2) |
| C1            | C2    | 1.365(3) | C1         | C2    | C3    | 121.7(2) |
| C2            | C3    | 1.519(3) | C2         | C3    | C4    | 107.4(2) |
| C3            | C4    | 1.518(3) | C3         | C4    | C5    | 121.2(2) |
| C4            | C5    | 1.359(3) | C4         | C5    | As1   | 116.2(2) |
| S1            | C2    | 1.713(2) | C2         | S1    | C7    | 91.5(1)  |
| S1            | C7    | 1.732(3) | C4         | S2    | C9    | 91.4(1)  |
| S2            | C4    | 1.718(2) | C1         | As1   | C10   | 89.55(9) |

|     |     |          |     |     |     |          |
|-----|-----|----------|-----|-----|-----|----------|
| S2  | C9  | 1.713(3) | C5  | As1 | C10 | 89.37(9) |
| As1 | C10 | 2.022(2) | As1 | C10 | C11 | 117.2(2) |
| C10 | C11 | 1.337(3) | C10 | C11 | C3  | 119.0(2) |
| C11 | C3  | 1.545(3) |     |     |     |          |

---

8



**Table S12.** ORTEP drawing (ellipsoids at 50% probability), and selected bond lengths and angles of **3c-DMAD**. All hydrogens of the ligands are omitted for clarity.

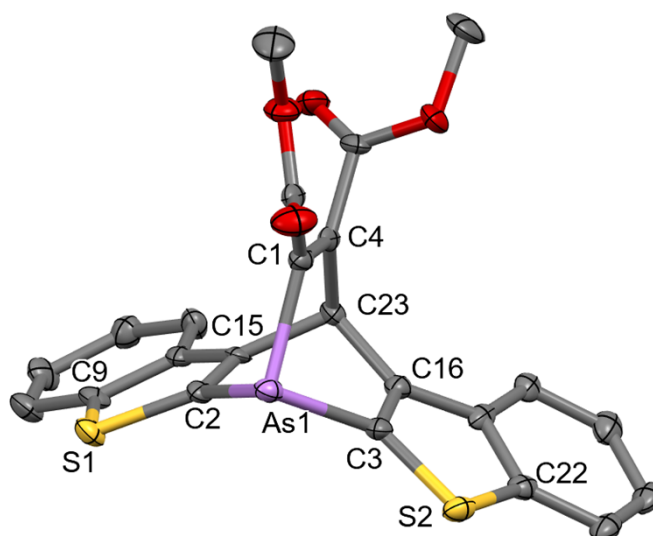

| Distances (Å) |       |          | Angles (°) |       |       |          |
|---------------|-------|----------|------------|-------|-------|----------|
| Atom1         | Atom2 | Length   | Atom1      | Atom2 | Atom3 | Angle    |
| As1           | C1    | 2.007(6) | C1         | As1   | C2    | 88.8(3)  |
| As1           | C2    | 1.953(7) | C1         | As1   | C3    | 89.5(3)  |
| As1           | C3    | 1.971(6) | C2         | As1   | C3    | 89.6(3)  |
| C2            | C15   | 1.36(1)  | As1        | C2    | C15   | 118.4(5) |
| C15           | C23   | 1.516(8) | C2         | C15   | C23   | 118.8(6) |
| C23           | C16   | 1.533(8) | C15        | C23   | C16   | 108.0(5) |
| C16           | C3    | 1.35(1)  | C23        | C16   | C3    | 118.7(5) |
| S1            | C2    | 1.739(6) | C16        | C3    | As1   | 118.2(5) |
| S1            | C9    | 1.757(7) | C2         | S1    | C9    | 91.4(3)  |

|    |     |          |     |    |     |          |
|----|-----|----------|-----|----|-----|----------|
| S2 | C3  | 1.729(6) | C3  | S2 | C22 | 90.8(3)  |
| S2 | C22 | 1.758(7) | As1 | C1 | C4  | 117.2(5) |
| C1 | C4  | 1.33(1)  | C1  | C4 | C23 | 119.8(6) |
| C4 | C23 | 1.528(9) |     |    |     |          |

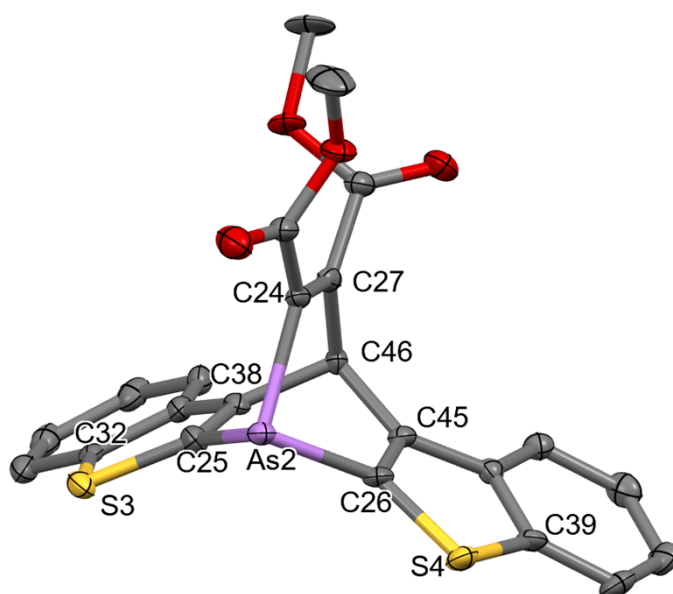

Distances (Å)

Angles (°)

| Atom1 | Atom2 | Length   | Atom1 | Atom2 | Atom3 | Angle    |
|-------|-------|----------|-------|-------|-------|----------|
| As2   | C24   | 2.017(6) | C24   | As2   | C25   | 89.4(3)  |
| As2   | C25   | 1.958(6) | C24   | As2   | C26   | 89.4(3)  |
| As2   | C26   | 1.961(6) | C25   | As2   | C26   | 89.4(3)  |
| C25   | C38   | 1.36(1)  | As2   | C25   | C38   | 119.1(5) |
| C38   | C46   | 1.526(8) | C25   | C38   | C46   | 117.8(5) |

|     |     |          |     |     |     |          |
|-----|-----|----------|-----|-----|-----|----------|
| C46 | C45 | 1.520(8) | C38 | C46 | C45 | 108.4(5) |
| C45 | C26 | 1.36(1)  | C46 | C45 | C26 | 118.4(5) |
| S3  | C25 | 1.741(6) | C45 | C26 | As2 | 118.5(5) |
| S3  | C32 | 1.748(8) | C25 | S3  | C32 | 90.8(3)  |
| S4  | C26 | 1.731(6) | C26 | S4  | C39 | 91.2(3)  |
| S4  | C39 | 1.770(7) | As2 | C24 | C27 | 116.5(5) |
| C24 | C27 | 1.34(1)  | C24 | C27 | C46 | 120.0(6) |
| C27 | C46 | 1.538(9) |     |     |     |          |

**Table S13.** ORTEP drawing (ellipsoids at 50% probability), and selected bond lengths and angles of **3c-benzynes**. All hydrogens of the ligands are omitted for clarity.

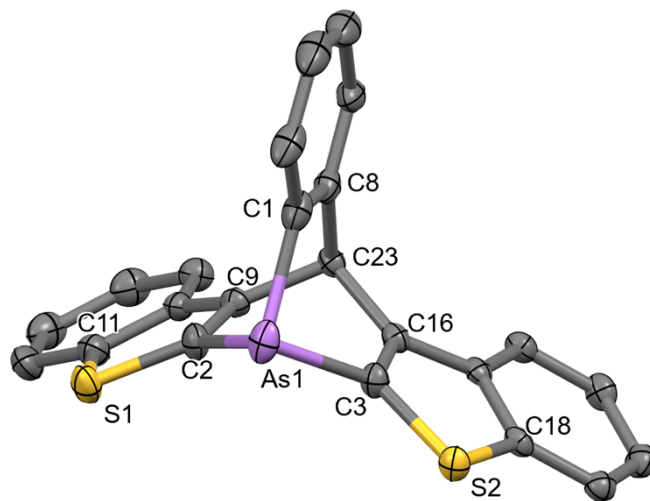

| Distances (Å) |       |          | Angles (°) |       |       |          |
|---------------|-------|----------|------------|-------|-------|----------|
| Atom1         | Atom2 | Length   | Atom1      | Atom2 | Atom3 | Angle    |
| As1           | C1    | 1.975(3) | C1         | As1   | C2    | 89.3(1)  |
| As1           | C2    | 1.962(3) | C1         | As1   | C3    | 89.9(1)  |
| As1           | C3    | 1.956(2) | C2         | As1   | C3    | 89.4(1)  |
| C2            | C9    | 1.361(4) | As1        | C2    | C9    | 118.5(2) |
| C9            | C23   | 1.521(3) | C2         | C9    | C23   | 118.5(2) |
| C23           | C16   | 1.522(3) | C9         | C23   | C16   | 108.2(2) |
| C16           | C3    | 1.358(3) | C23        | C16   | C3    | 118.6(2) |
| S1            | C2    | 1.729(3) | C16        | C3    | As1   | 118.7(2) |
| S1            | C11   | 1.743(3) | C2         | S1    | C11   | 91.6(1)  |
| S2            | C3    | 1.730(2) | C3         | S2    | C18   | 91.2(1)  |

|    |     |          |     |    |     |          |
|----|-----|----------|-----|----|-----|----------|
| S2 | C18 | 1.745(2) | As1 | C1 | C8  | 118.1(2) |
| C1 | C8  | 1.397(4) | C1  | C8 | C23 | 117.1(2) |
| C8 | C23 | 1.534(3) |     |    |     |          |

---

**Table S14.** ORTEP drawing (ellipsoids at 50% probability), and selected bond lengths and angles of **3a-W(CO)<sub>5</sub>**. All hydrogens of the ligands are omitted for clarity.

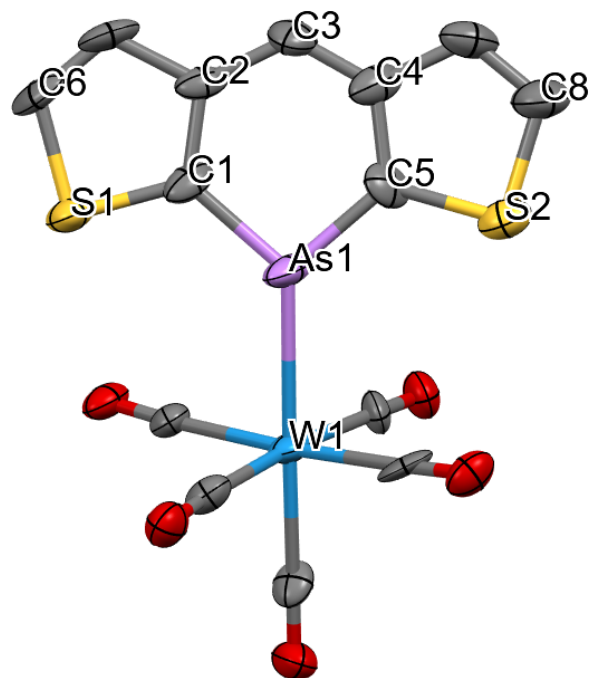

| Distances (Å) |       |          | Angles (°) |       |       |          |
|---------------|-------|----------|------------|-------|-------|----------|
| Atom1         | Atom2 | Length   | Atom1      | Atom2 | Atom3 | Angle    |
| As1           | W1    | 2.586(2) | C1         | As1   | C5    | 98.1(9)  |
| As1           | C1    | 1.87(2)  | C1         | As1   | W1    | 128.6(6) |
| As1           | C5    | 1.84(2)  | C5         | As1   | W1    | 128.9(6) |
| C1            | C2    | 1.41(3)  | As1        | C1    | C2    | 124(1)   |
| C2            | C3    | 1.43(2)  | C1         | C2    | C3    | 124(2)   |
| C3            | C4    | 1.34(3)  | C2         | C3    | C4    | 124(2)   |
| C4            | C5    | 1.43(3)  | C3         | C4    | C5    | 126(2)   |
| S1            | C1    | 1.72(2)  | C4         | C5    | As1   | 124(1)   |

|    |     |         |     |    |     |          |
|----|-----|---------|-----|----|-----|----------|
| S1 | C6  | 1.74(2) | C1  | S1 | C6  | 89.9(9)  |
| S2 | C5  | 1.72(2) | C5  | S2 | C8  | 91(1)    |
| S2 | C8  | 1.76(2) | As1 | W1 | C10 | 177.4(6) |
| W1 | C10 | 2.00(2) | As1 | W1 | C11 | 88.3(5)  |
| W1 | C11 | 2.04(2) | As1 | W1 | C12 | 96.2(5)  |
| W1 | C12 | 2.02(2) | As1 | W1 | C13 | 87.5(5)  |
| W1 | C13 | 2.07(2) | As1 | W1 | C14 | 88.2(5)  |
| W1 | C14 | 2.05(2) |     |    |     |          |

**Table S15.** ORTEP drawing (ellipsoids at 50% probability), and selected bond lengths and angles of **3d'**. All hydrogens of the ligands are omitted for clarity.

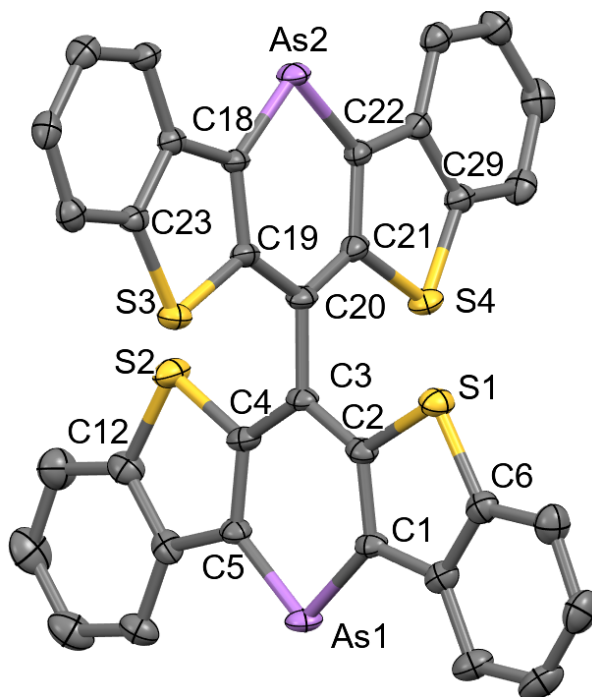

| Distances (Å) |       |          | Angles (°) |       |       |          |
|---------------|-------|----------|------------|-------|-------|----------|
| Atom1         | Atom2 | Length   | Atom1      | Atom2 | Atom3 | Angle    |
| As1           | C1    | 1.860(3) | C1         | As1   | C5    | 96.5(2)  |
| As1           | C5    | 1.851(4) | As1        | C1    | C2    | 125.1(3) |
| C1            | C2    | 1.408(5) | C1         | C2    | C3    | 126.4(3) |
| C2            | C3    | 1.390(5) | C2         | C3    | C4    | 120.5(3) |
| C3            | C4    | 1.401(5) | C3         | C4    | C5    | 127.2(3) |
| C4            | C5    | 1.408(4) | C4         | C5    | As1   | 124.4(3) |
| S1            | C2    | 1.762(3) | C2         | S1    | C6    | 92.0(2)  |
| S1            | C6    | 1.750(4) | C4         | S2    | C12   | 91.6(2)  |



|     |     |          |     |     |     |          |
|-----|-----|----------|-----|-----|-----|----------|
| S2  | C4  | 1.757(4) | C18 | As2 | C22 | 97.4(2)  |
| S2  | C12 | 1.745(3) | As2 | C18 | C19 | 123.8(3) |
| As2 | C18 | 1.866(3) | C18 | C19 | C20 | 126.8(3) |
| As2 | C22 | 1.867(4) | C19 | C20 | C21 | 120.9(3) |
| C18 | C19 | 1.417(5) | C20 | C21 | C22 | 127.4(3) |
| C19 | C20 | 1.401(5) | C21 | C22 | As2 | 123.5(3) |
| C20 | C21 | 1.392(5) | C19 | S3  | C23 | 91.9(2)  |
| C21 | C22 | 1.415(5) | C21 | S4  | C29 | 91.6(2)  |
| S3  | C19 | 1.761(4) |     |     |     |          |
| S3  | C23 | 1.742(4) |     |     |     |          |
| S4  | C21 | 1.760(4) |     |     |     |          |
| S4  | C29 | 1.749(3) |     |     |     |          |

**Table S16.** ORTEP drawing (ellipsoids at 50% probability), and selected bond lengths and angles of **3d-P'**. All hydrogens of the ligands are omitted for clarity.

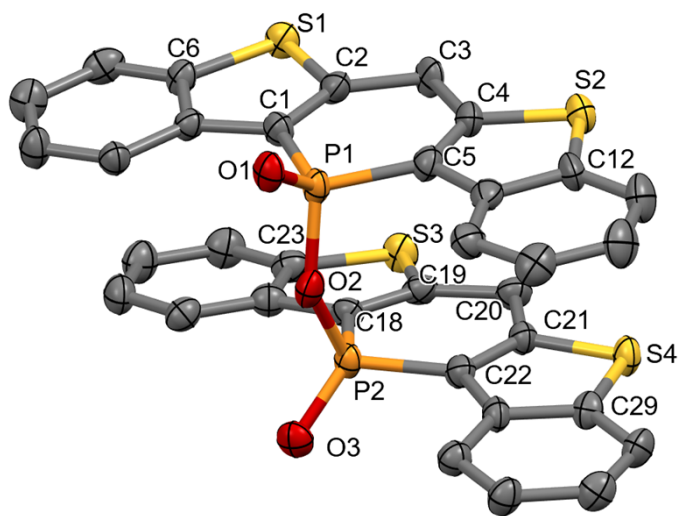

| Distances (Å) |       |          | Angles (°) |       |       |          |
|---------------|-------|----------|------------|-------|-------|----------|
| Atom1         | Atom2 | Length   | Atom1      | Atom2 | Atom3 | Angle    |
| P1            | O1    | 1.460(5) | O1         | P1    | O2    | 107.7(3) |
| P1            | O2    | 1.611(4) | O1         | P1    | C1    | 116.1(3) |
| P1            | C1    | 1.765(7) | O1         | P1    | C5    | 115.9(3) |
| P1            | C5    | 1.750(8) | C1         | P1    | C5    | 104.0(3) |
| C1            | C2    | 1.37(1)  | C5         | P1    | O2    | 105.2(3) |
| C2            | C3    | 1.47(1)  | C1         | P1    | O2    | 107.1(3) |
| C3            | C4    | 1.50(1)  | P1         | C1    | C2    | 121.3(5) |
| C4            | C5    | 1.368(9) | C1         | C2    | C3    | 129.2(6) |
| S1            | C2    | 1.735(6) | C2         | C3    | C4    | 114.7(6) |
| S1            | C6    | 1.754(7) | C3         | C4    | C5    | 127.5(6) |

|       |     |          |       |     |     |          |
|-------|-----|----------|-------|-----|-----|----------|
| S2    | C4  | 1.739(8) | C4    | C5  | P1  | 122.8(5) |
| S2    | C12 | 1.730(7) | C2    | S1  | C6  | 91.4(3)  |
| P2    | O3  | 1.467(5) | C4    | S2  | C12 | 91.4(3)  |
| P2    | O2  | 1.621(4) | O3    | P2  | O2  | 107.3(3) |
| P2    | C18 | 1.763(6) | O3    | P2  | C22 | 116.2(3) |
| P2    | C22 | 1.771(8) | O3    | P2  | C18 | 116.2(3) |
| C18   | C19 | 1.35(1)  | C22   | P2  | O3  | 116.2(3) |
| C19   | C20 | 1.51(1)  | C22   | P2  | C18 | 103.3(3) |
| C20   | C21 | 1.509(9) | P2    | C18 | C19 | 123.8(5) |
| C21   | C22 | 1.37(1)  | C18   | C19 | C20 | 129.0(6) |
| S3    | C19 | 1.741(6) | C19   | C20 | C21 | 111.8(5) |
| S3    | C23 | 1.726(8) | C20   | C21 | C22 | 130.3(6) |
| S4    | C21 | 1.730(7) | C21   | C22 | P2  | 121.4(5) |
| S4    | C29 | 1.737(6) | C19   | S3  | C23 | 91.6(3)  |
| <hr/> |     |          | C21   | S4  | C29 | 91.7(3)  |
|       |     |          | C22   | P2  | O2  | 106.8(3) |
|       |     |          | C18   | P2  | O2  | 106.3(3) |
|       |     |          | <hr/> |     |     |          |

The solid samples of **3a**, **3b**, and **3d** were non-emissive. The packing structures of **3b** and **3d-plate** exhibited a sandwich herringbone arrangement, stacked through As $\cdots$ C interactions. **3a** and **3d-needle** displayed 1D-columnar packing, where As $\cdots$ As interactions were also observed. However, it was suggested that the As lone pair and  $\sigma^*(\text{As}-\text{C})$  interaction occurred in a loosely packed arrangement. Despite the presence of arsenic-related interactions, no orbital interactions conducive to solid-state emission were detected. Given that the compounds synthesized in this study are intrinsically non-emissive due to symmetry-forbidden transitions, it is likely that these compounds, lacking the interactions found in **3c**, did not exhibit solid-state emission ( $\Phi < 0.01$ ).

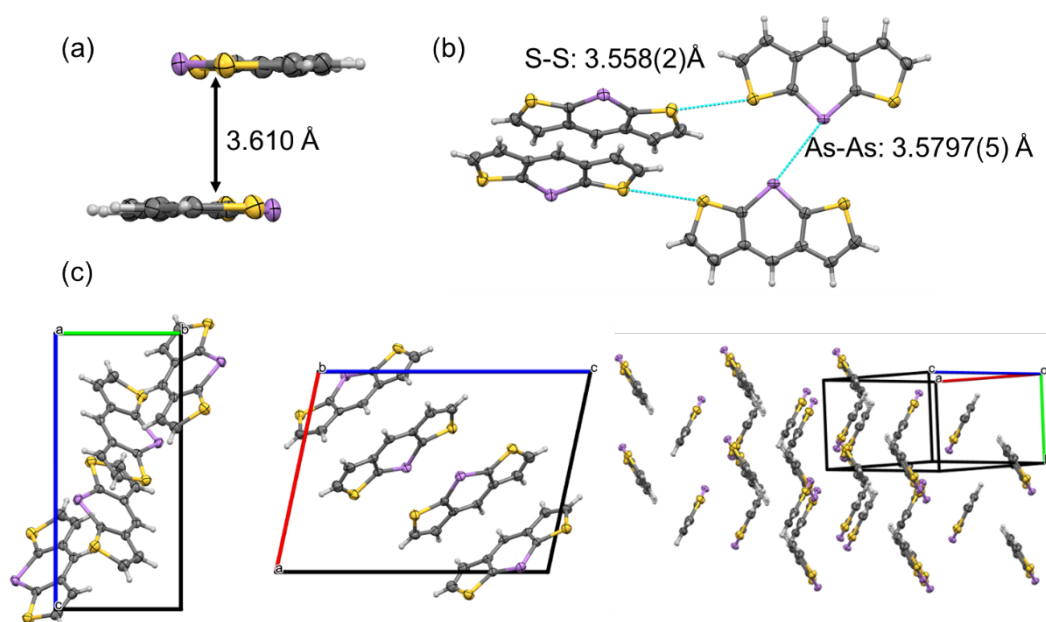

**Figure S1.** The crystal structure of **3a**. (a) stacking dimer. (b) Intermolecular interactions of As-As, S-S. (c) Packing structures along with a, b, c-axis.

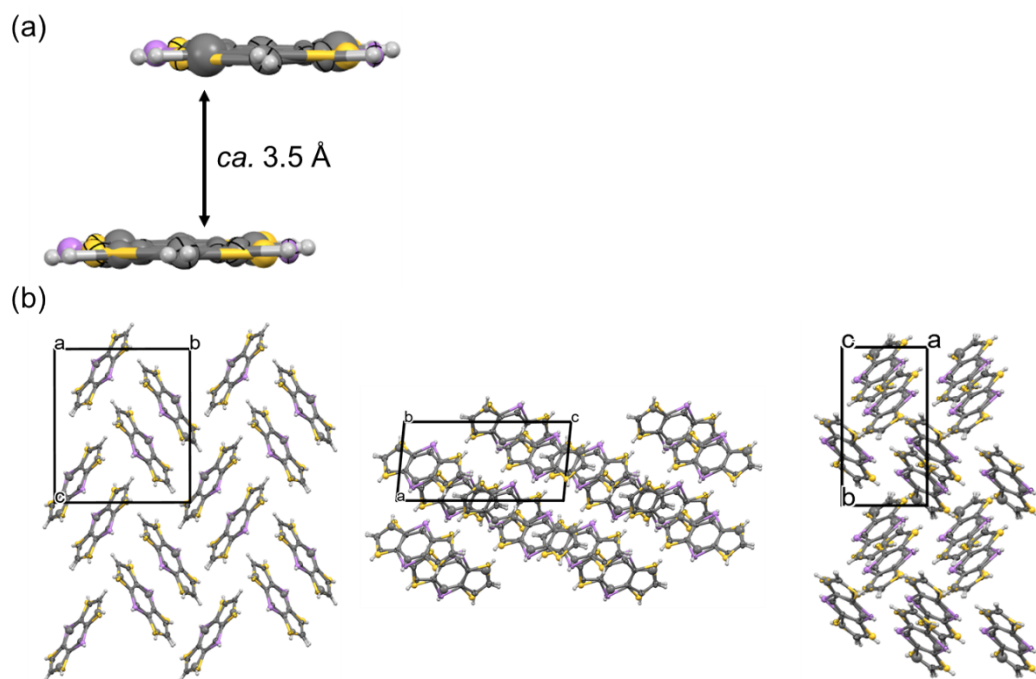

**Figure S2.** The crystal structure of **3b**. (a) stacking dimer. (b) Packing structures along with a, b, c-axis.

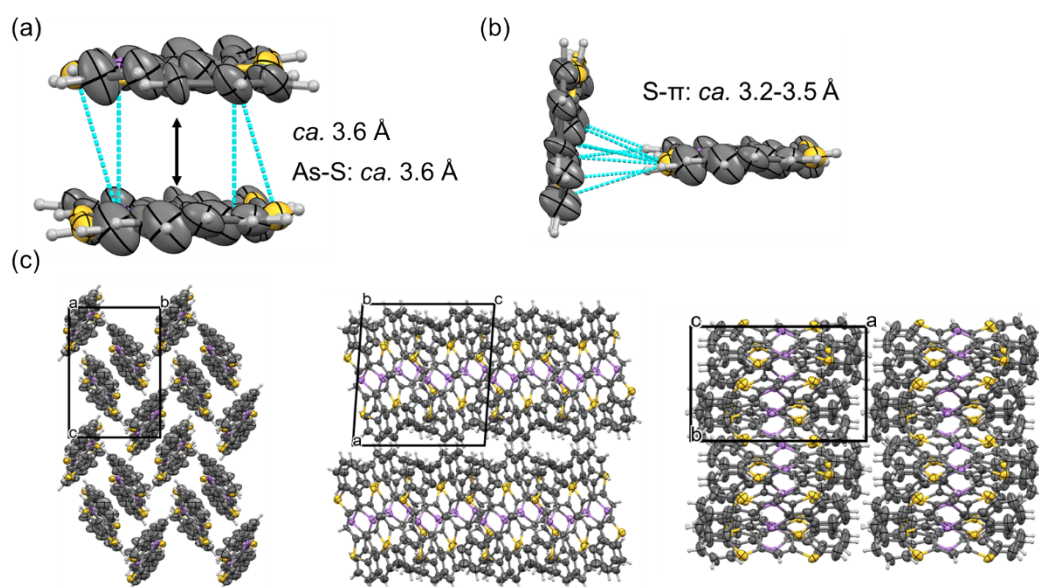

**Figure S3.** The crystal structure of **3d-plate**. (a) stacking dimer. (b) Intermolecular interactions of S-π. (c) Packing structures along with a, b, c-axis.

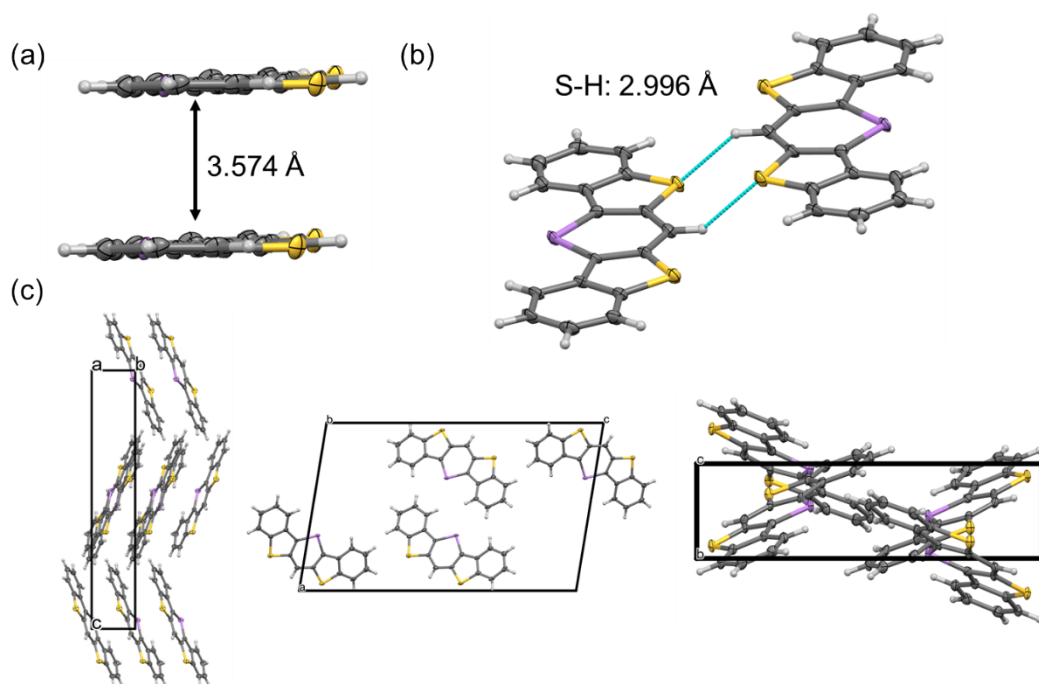

**Figure S4.** The crystal structure of **3d-needle**. (a) stacking dimer. (b) Intermolecular interactions of S-H. (c) Packing structures along with a, b, c-axis.

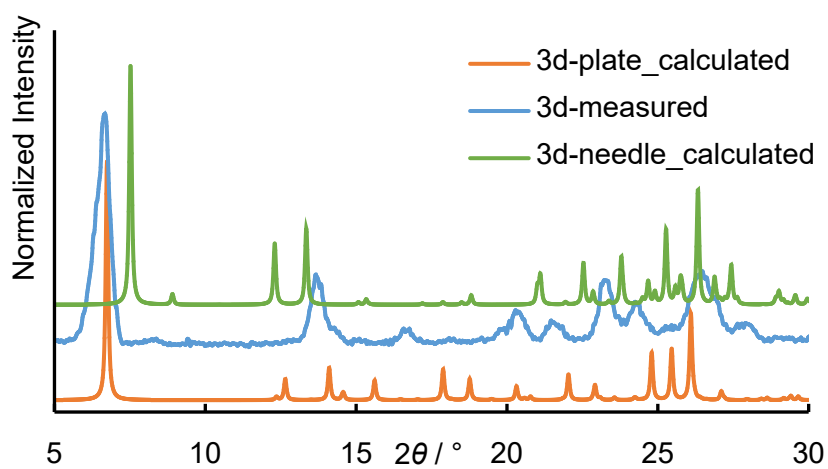

**Figure S5.** Powder XRD of **3d** used for photophysical and TRMC measurements.

## 5. Photophysical properties

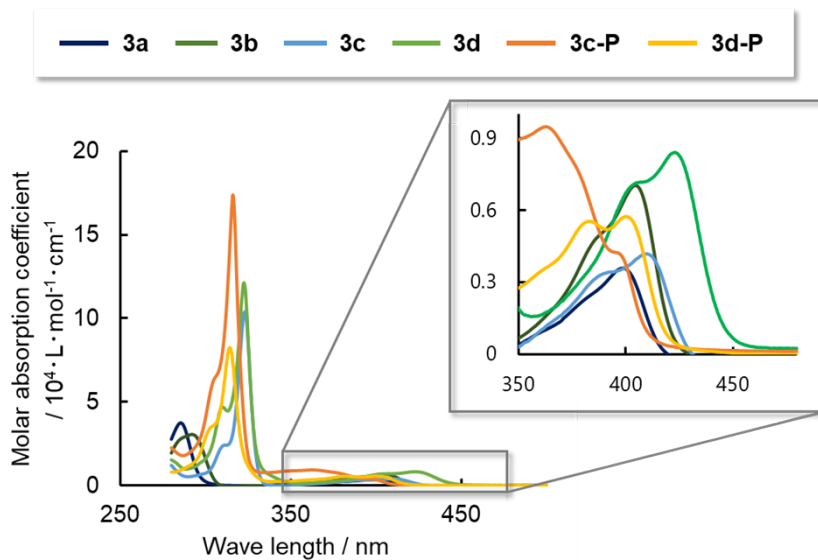

**Figure S6.** UV-vis spectra of **3a-d**, **3c-P**, and **3d-P** in 2-MeTHF.

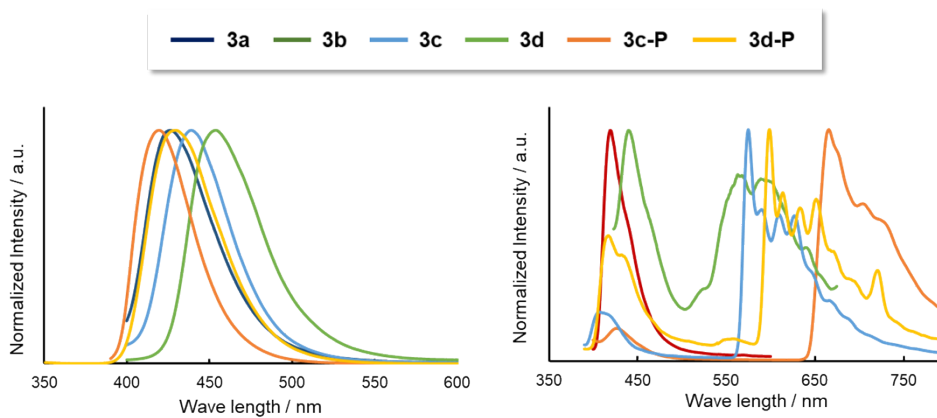

**Figure S7.** Emission spectra of **3a-d**, **3c-P**, and **3d-P** in 2-MeTHF at (a) 298 K and (b) 77 K.

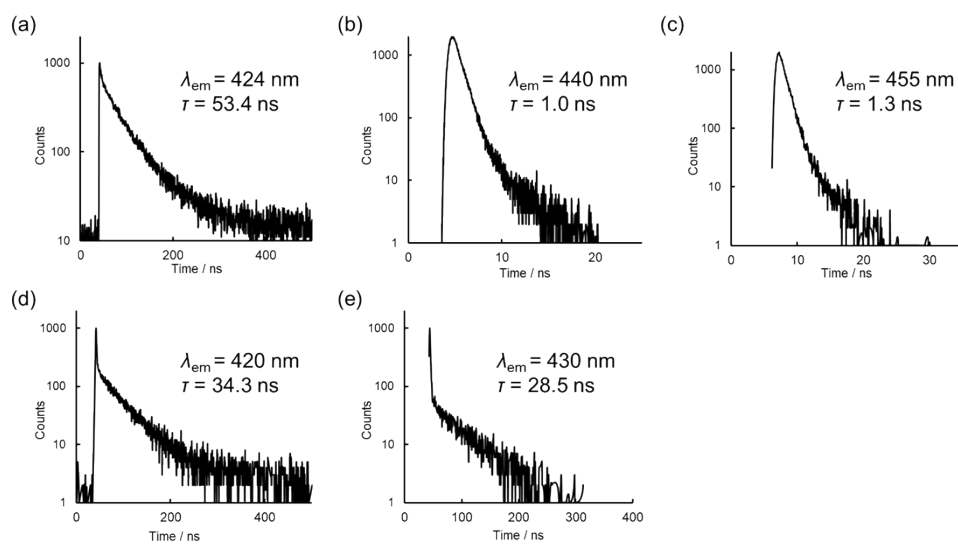

**Figure S8.** The emission decay kinetics in 2-MeTHF solution at 298 K. (a) **3a**, (b)**3c**, (c) **3d**, (d) **3c-P**, (e) **3d-P**.



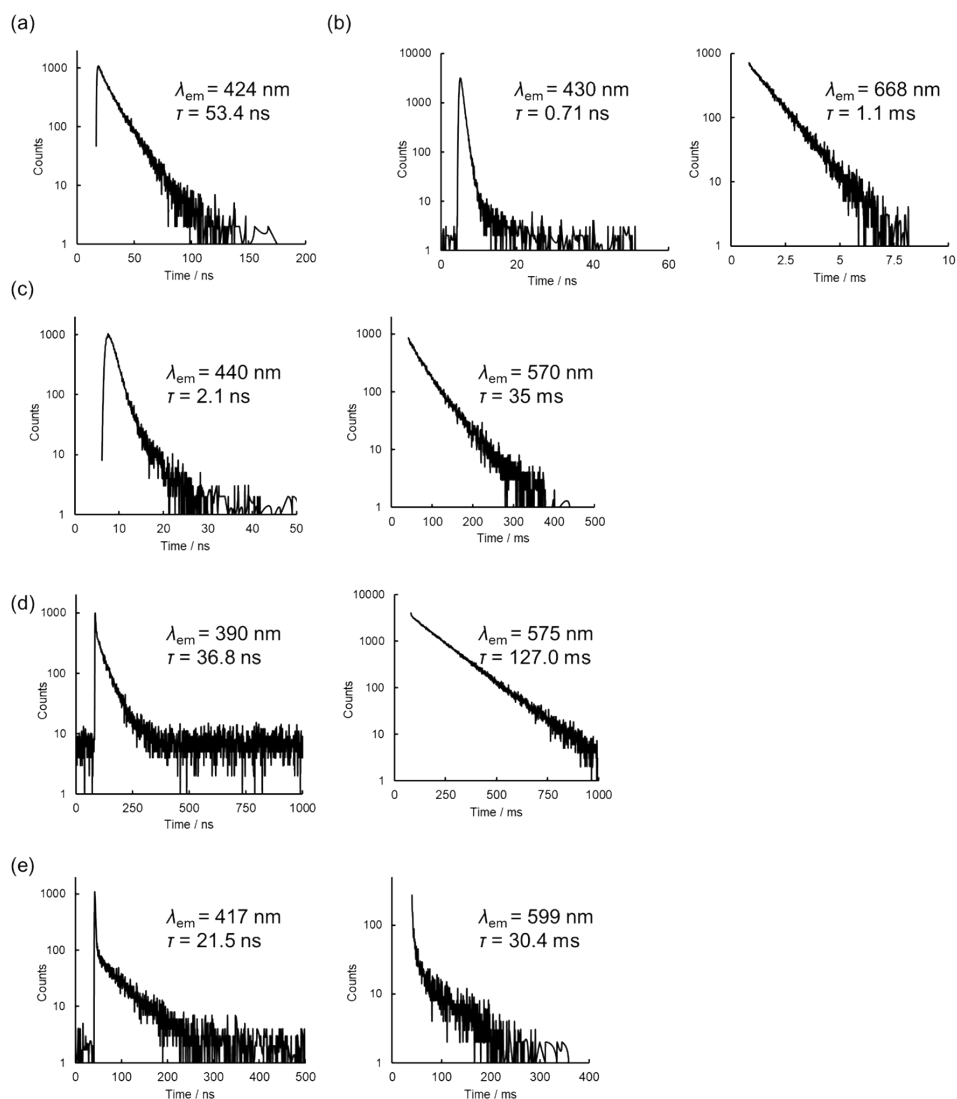

**Figure S9.** The emission decay kinetics in 2-MeTHF solution at 77K(a) **3a**, (b)**3c**, (c) **3d**, (d) **3c-P**, (e) **3d-P**.

**Table S17.** Photophysical properties of **3d-P** in 2-MeTHF solutions.

|             | $\lambda_{\text{abs}}$<br>[nm] | $\epsilon$<br>[M <sup>-1</sup> ·cm <sup>-1</sup> ] | $\lambda_{\text{ex}}$<br>[nm] | 298 K                         |        | 77 K                          |            |
|-------------|--------------------------------|----------------------------------------------------|-------------------------------|-------------------------------|--------|-------------------------------|------------|
|             |                                |                                                    |                               | $\lambda_{\text{em}}$<br>[nm] | $\phi$ | $\lambda_{\text{em}}$<br>[nm] | $\phi$     |
| <b>3d-P</b> | 392                            | 5700                                               | 316                           | 430                           | 0.04   | 417, 599                      | 0.08, 0.20 |

## 6. Reactivity

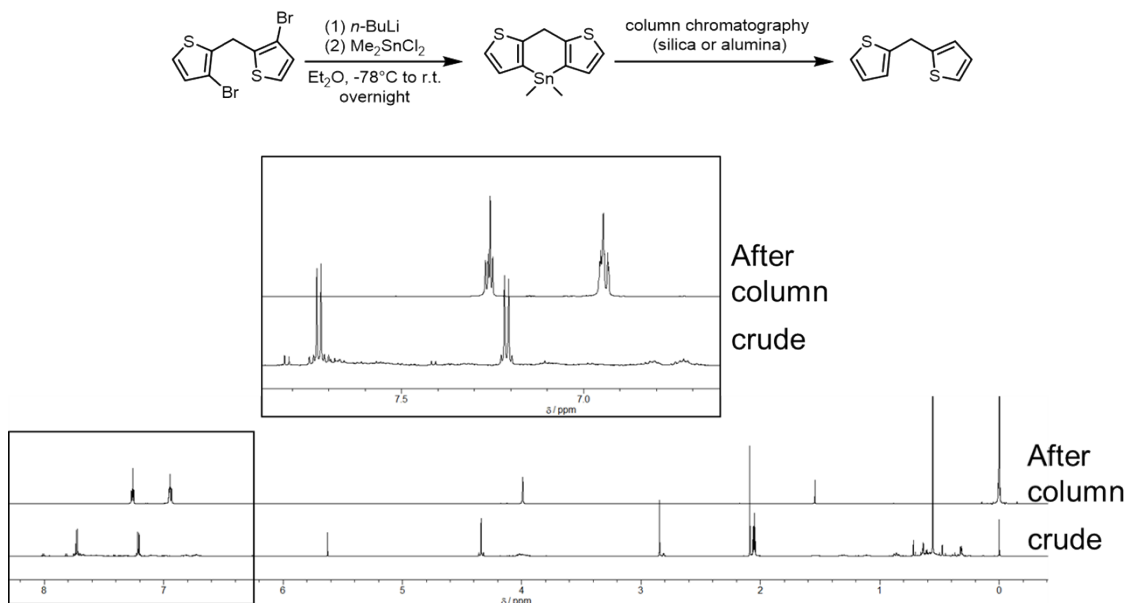

**Figure S10.** <sup>1</sup>H-NMR spectra of crude and after column chromatography of **2b**.

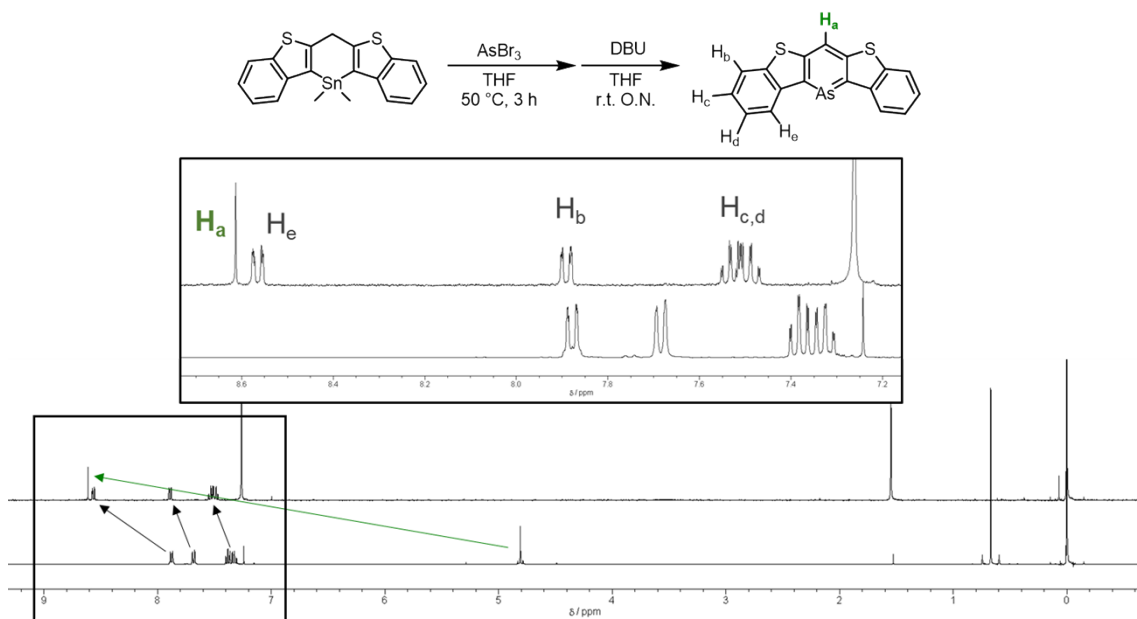

**Figure S11.** <sup>1</sup>H-NMR spectra of **2d** and **3d**. Methyl signal of Sn was disappeared and benzylic proton (4.81 ppm) of **2c** was shifted to 8.58 ppm.

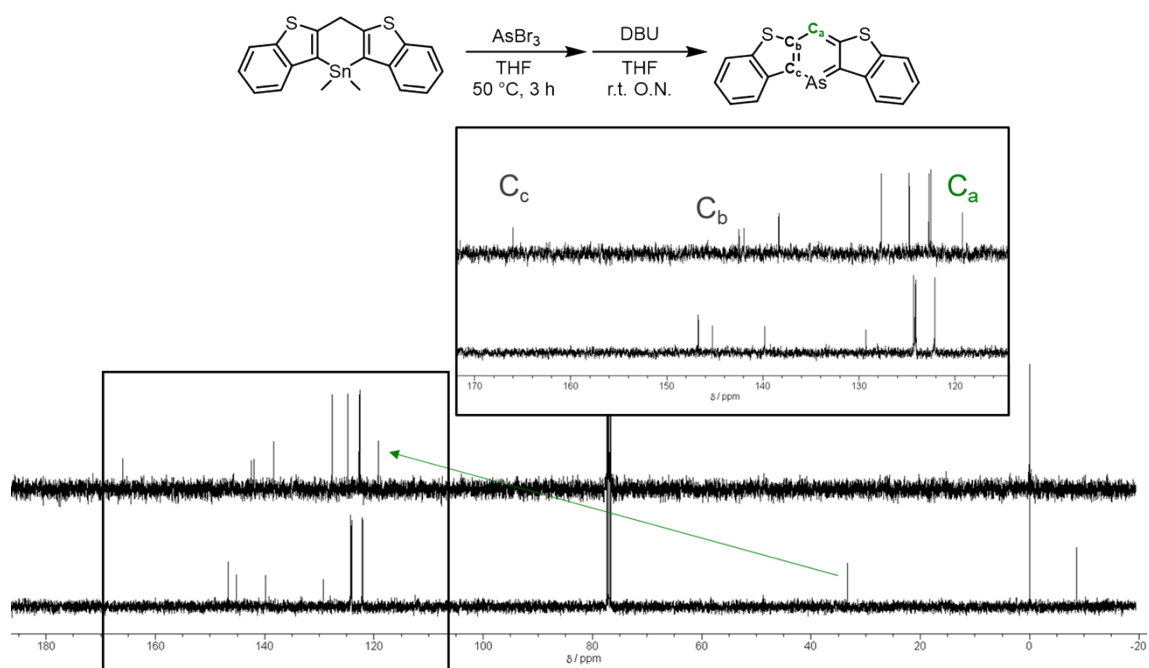

**Figure S12.**  $^{13}\text{C}$ -NMR spectra of **2d** and **3d**. Methyl signal of Sn disappeared and benzylic carbon (33.3 ppm) of **2c** was shifted to 119.2 ppm.

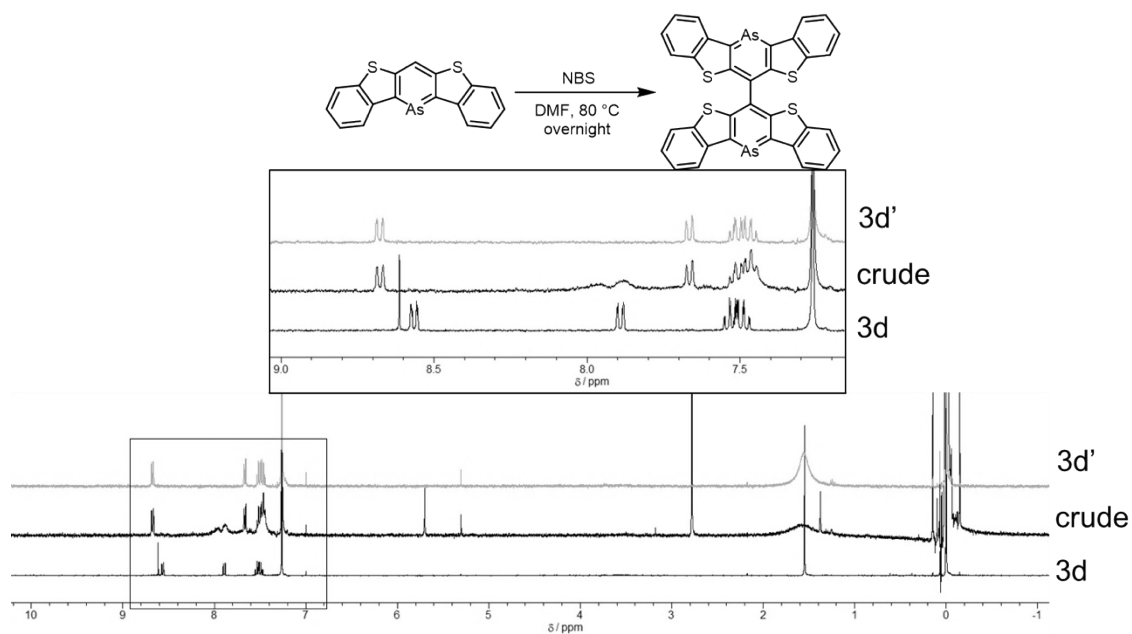

**Figure S13.**  $^1\text{H}$ -NMR spectra of after the reaction of **3d** with NBS.

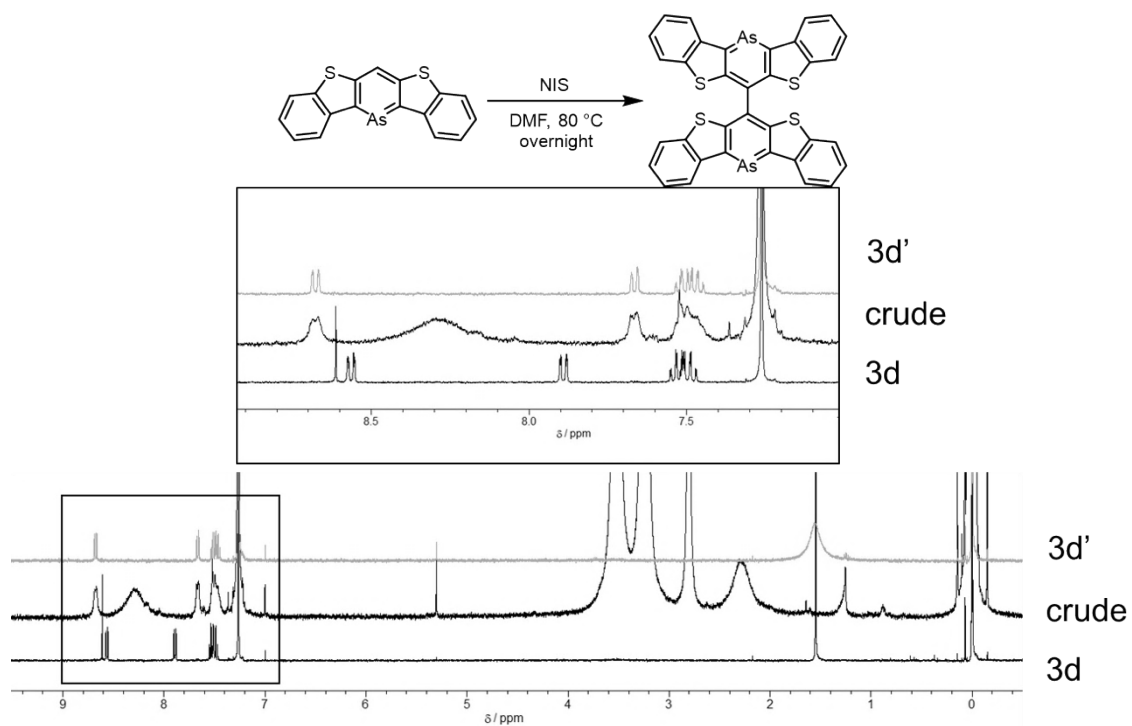

**Figure S14.** <sup>1</sup>H-NMR spectra of after the reaction of **3d** with NIS.

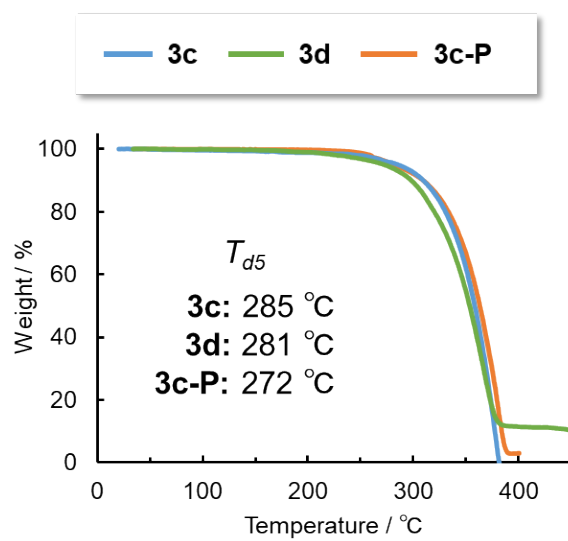

**Figure S15.** Thermal gravimetric analysis of **3c**, **3d** and **3c-P** under N<sub>2</sub>.

## 7. Time-resolved microwave conductivity

Time-resolved microwave conductivity (TRMC) was measured for powder samples prepared on an adhesive tape on a quartz substrate. The microwave frequency and its power were  $\sim 9$  GHz and  $\sim 3$  mW, respectively. A third harmonic generation (355 nm) of a Nd:YAG laser (Continuum Inc., Surelite II, 5–8 ns pulse duration, 10 Hz) was used for the excitation (incident photon density  $I_0 = 9.1 \times 10^{15}$  photons  $\text{cm}^{-2}$  pulse $^{-1}$ ). The photoconductivity ( $\Delta\sigma = A^{-1} \Delta P_r P_r^{-1}$  where  $A$  is the sensitivity factor,  $P_r$  is the reflected microwave power, and  $\Delta P_r$  is the change in  $P_r$  upon exposure to light) was converted into the product of the quantum yield ( $\phi$ ) and sum of the charge carrier mobilities  $\Sigma\mu (= \mu_+ + \mu_-)$  using the relationship  $\phi\Sigma\mu = \Delta\sigma(eI_0F_{\text{light}})^{-1}$ , where  $e$  and  $F_{\text{light}}$  are the electron charge and correction (or filling) factor, respectively. The experiments were performed at room temperature in the air.

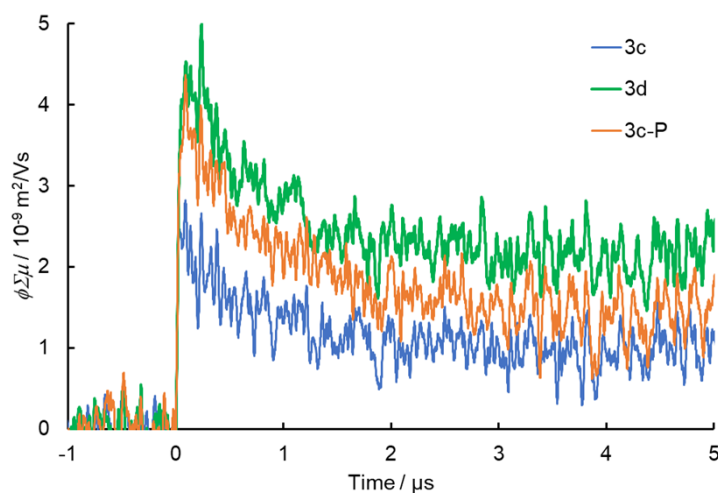

**Figure S16.** Photoconductivity transients recorded in crystalline powders of **3c-d** and **3c-P** upon excitation at 355 nm at  $9.1 \times 10^{15}$  photons  $\text{cm}^{-2}$  under air.

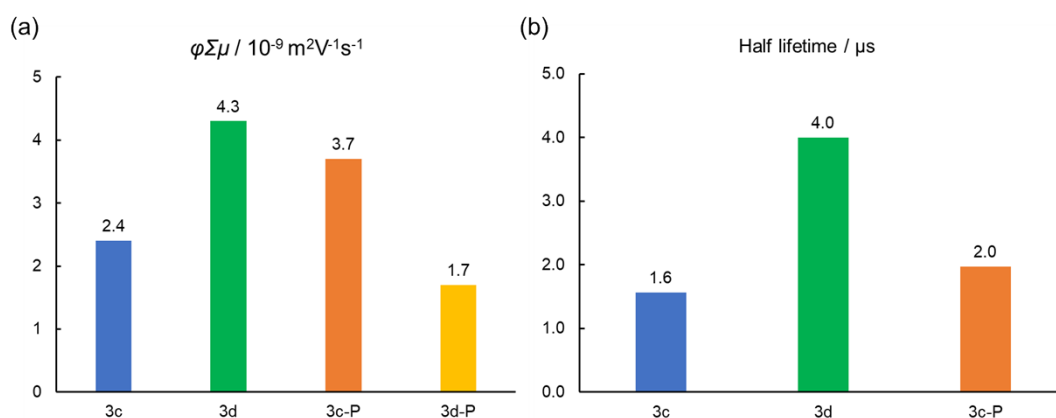

**Figure S17.** Summary of (a) photoconductivity of **3c**, **3c-d**, **3c-P**, and **3d-P**, and (b) life times of **3c**, **3c-d**, and **3c-P** (the signal of **3d-P** was too weak).

## 8. DFT calculations

Density functional theory (DFT) calculations were carried out to investigate the frontier orbitals. Initial structures were based on the X-ray data of the related compounds. For all the calculations, Gaussian 16 code was employed.<sup>[11]</sup> The calculations employed (TD-)B3LYP/def2-TZVP except for the **3a-W(CO)<sub>5</sub>** and solid state dimer of **3c** and **3c-P**, which were calculated at B3LYP /def2-TZVP extended with Grimme's dispersion correction methods of D3 with Becke-Johnson damping (D3BJ) version and M06-2X/def2-TZVP, respectively. Also, natural bonding orbital (NBO) analysis was conducted by NBO program was version 7.0.<sup>[12]</sup> The nucleus-independent chemical shift NICS(1)<sub>zz</sub> were calculated at the geometrical center of the ring.<sup>[13]</sup> NICS-XY scans<sup>[14]</sup> were performed using the py.Aroma 3 package,<sup>[15]</sup> scanning from 1.7 Å above the plane of the ring. The anisotropy of the current (induced) density (ACID)<sup>[16]</sup> calculations were carried out at the CSGT-B3LYP/def2-TZVP level of theory. at the B3LYP-D3(BJ)/def2-TZVP level of theory. Moreover, non-covalent interaction (NCI) analysis<sup>[17]</sup> was performed using Multiwfn program packages,<sup>[18]</sup> which was represented by VMD1.9.3 program.<sup>[19]</sup> Charge transfer integrals in the crystal packing structures were calculated using the ADF2023 program<sup>[20]</sup> at the PBE/TZ2P level of theory.

**Table S18.** Hybrid of lone pair on Pn atom and Wiberg bond indices of C–Pn bond for pyridine, phosphinine, arsinine, **3a-d**, **3c-P**, and **3d-P** by NBO analysis based on the optimized structures.

|             | Hybrid orbital     |           |           |           | WBI  | NPA    |
|-------------|--------------------|-----------|-----------|-----------|------|--------|
|             |                    |           |           |           | C–Pn | charge |
| Pyridine    | sp <sup>2.25</sup> | s (30.7%) | p (69.1%) | d (0.2%)  | 1.44 | -0.411 |
| Phosphinine | sp <sup>0.59</sup> | s (62.8%) | p (37.1%) | d (0.07%) | 1.34 | +0.712 |
| Arsinine    | sp <sup>0.56</sup> | s (64.0%) | p (35.6%) | d (0.05%) | 1.31 | +0.765 |
| <b>3a</b>   | sp <sup>0.38</sup> | s (72.2%) | p (27.7%) | d (0.03%) | 1.22 | +0.727 |
| <b>3b</b>   | sp <sup>0.39</sup> | s (72.1%) | p (27.8%) | d (0.03%) | 1.20 | +0.701 |
| <b>3c</b>   | sp <sup>0.38</sup> | s (72.3%) | p (27.7%) | d (0.03%) | 1.22 | +0.720 |
| <b>3d</b>   | sp <sup>0.39</sup> | s (71.8%) | p (28.2%) | d (0.03%) | 1.21 | +0.715 |
| <b>3c-P</b> | sp <sup>0.61</sup> | s (62.2%) | p (37.7%) | d (0.03%) | 1.27 | +0.680 |
| <b>3d-P</b> | sp <sup>0.53</sup> | s (65.5%) | p (34.4%) | d (0.03%) | 1.26 | +0.679 |

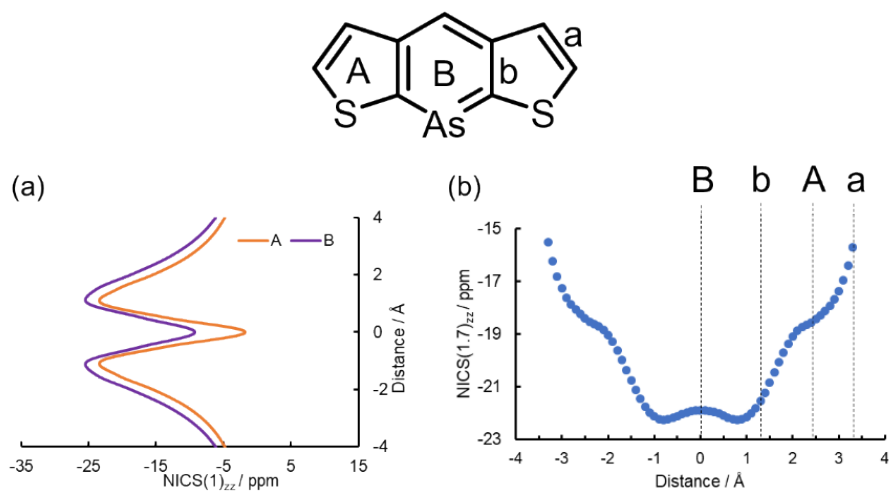

**Figure S18.** (a) NICS scan and (b) NICS-XY scan of **3a**

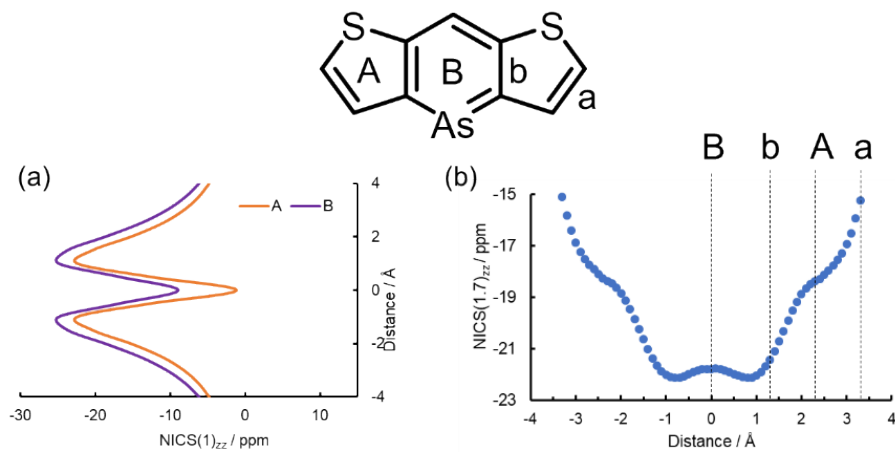

**Figure S19.** (a) NICS scan and (b) NICS-XY scan of **3b**

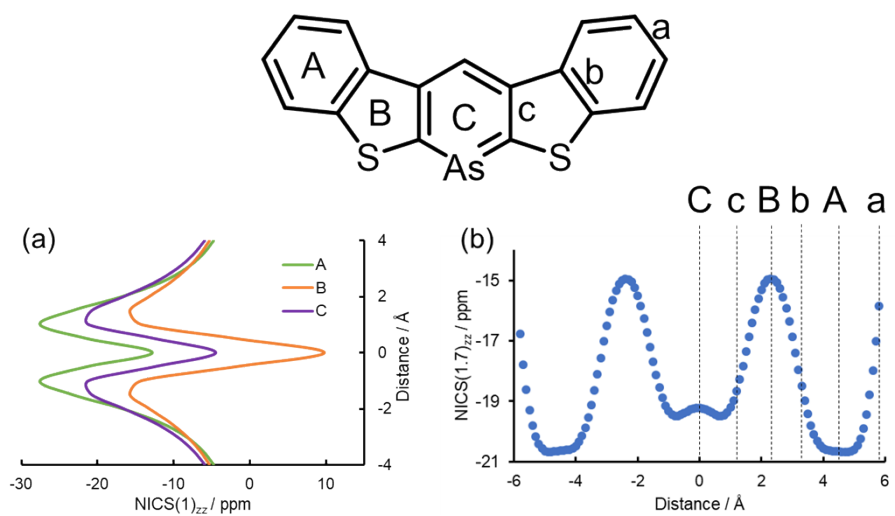

**Figure S20.** (a) NICS scan and (b) NICS-XY scan of **3c**

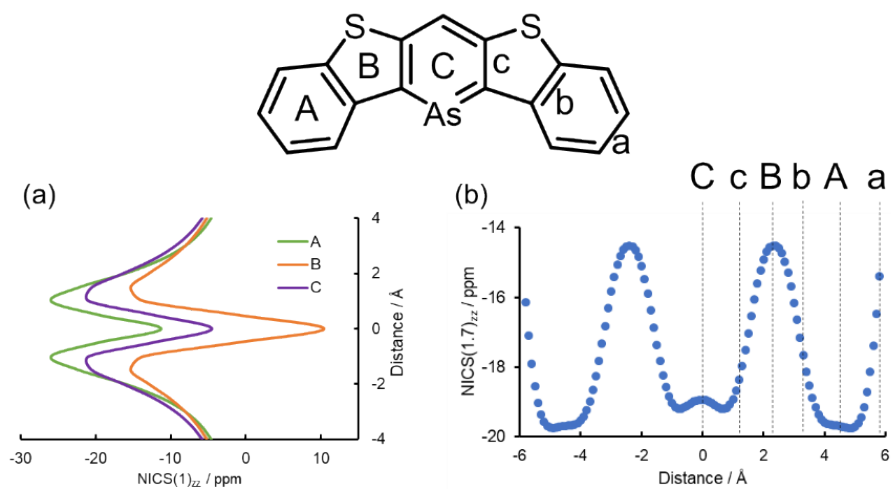

**Figure S21.** (a) NICS scan and (b) NICS-XY scan of **3d**

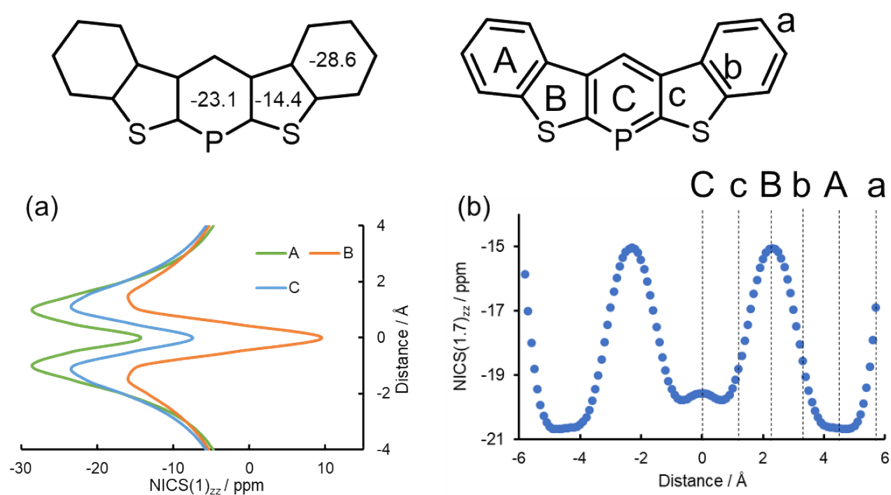

**Figure S22.** (a) NICS scan and (b) NICS-XY scan of **3c-P**

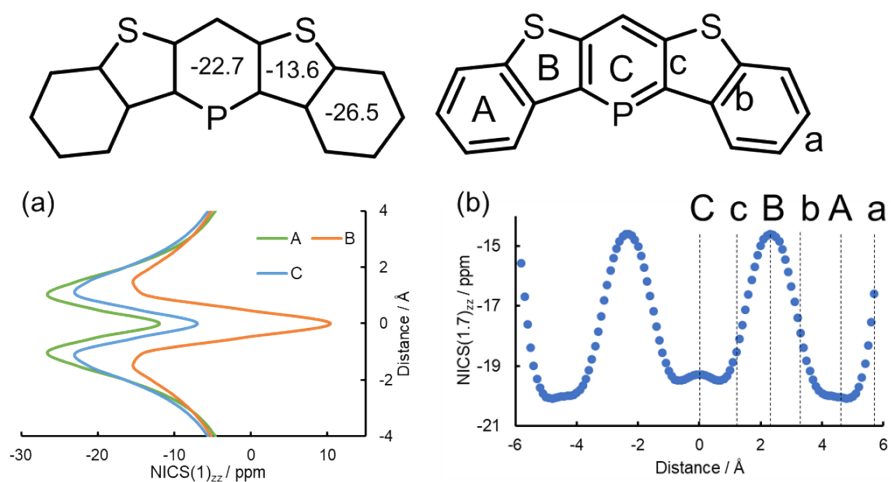

**Figure S23.** (a) NICS scan and (b) NICS-XY scan of **3d-P**



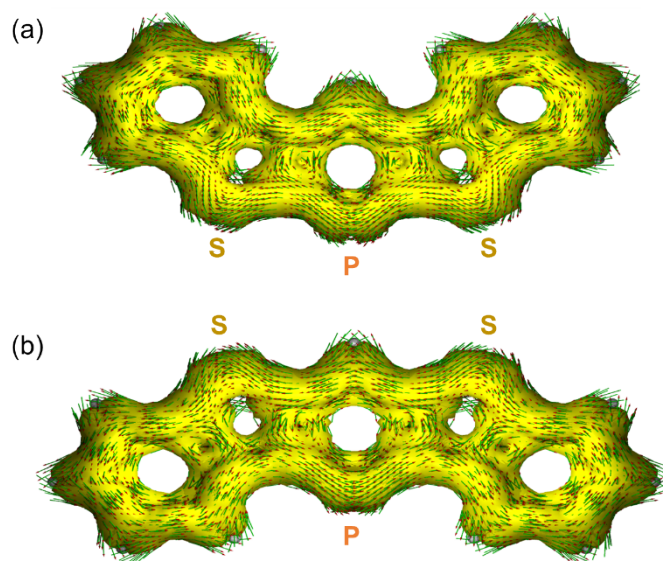

**Figure S24.** ACID plots of (a) **3c-P** and (b) **3d-P**.

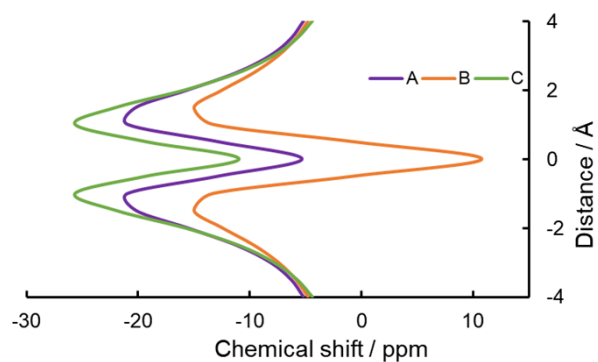

**Figure S25.** NICS<sub>zz</sub> scan of **3d'**. A: arsinine, B: thiophene, and C: benzene

**Table S19.** TD-DFT calculation for selected dimer  $d_1$ – $d_4$  of **3c** at M06/def2tzvp.

|               | HOMO / eV | LUMO / eV | $\Delta E$ / eV [a] | $\lambda$ / nm [b] | $f$ [c] |
|---------------|-----------|-----------|---------------------|--------------------|---------|
| Monomer       | -5.77     | -2.00     | 3.09                | 401                | 0.0266  |
| $d_1$         | -5.60     | -1.88     | 3.00                | 416                | 0.0126  |
| $d_2$         | -5.80     | -2.07     | 3.09                | 402                | 0.0772  |
| $d_3$         | -5.65     | -2.00     | 2.93                | 424                | 0.0214  |
| $d_4$         | -5.47     | -2.17     | 2.61                | 476                | 0.2039  |
| $d_1$ – $d_4$ | -5.44     | -2.28     | 2.48                | 498                | 0.1479  |

[a] Excitation energy. [b] wavelength of the excitation [c] oscillator strength.

**Table S20.** TD-DFT calculation for selected dimer  $d_1$ - $d_4$  of **3c-P** at M06/def2tzvp.

|         | HOMO / eV | LUMO / eV | $\Delta E$ / eV [a] | $\lambda$ / nm [b] | $f$ [c] |
|---------|-----------|-----------|---------------------|--------------------|---------|
| Monomer | -6.85     | -1.29     | 3.40                | 340                | 0.0215  |
| $d_4$   | -6.60     | -1.40     | 3.64                | 365                | 0.1288  |

[a] Excitation energy. [b] wavelength of the excitation [c] oscillator strength.

**Table S21.** Transfer integrals between the dimer  $d_1$ - $d_4$  of **3c** at PBE/TZ2P.

|       | $t_{\text{HOMO}}$ / meV | $t_{\text{LUMO}}$ / meV | $r_i$ / Å [a] |
|-------|-------------------------|-------------------------|---------------|
| $d_1$ | 26.0                    | 17.1                    | 5.90          |
| $d_2$ | 32.0                    | 6.4                     | 6.33          |
| $d_3$ | 82.9                    | 1.5                     | 3.54          |
| $d_4$ | 176.0                   | 245.2                   | 8.63          |

[a] Distances between the centroid of the molecules.

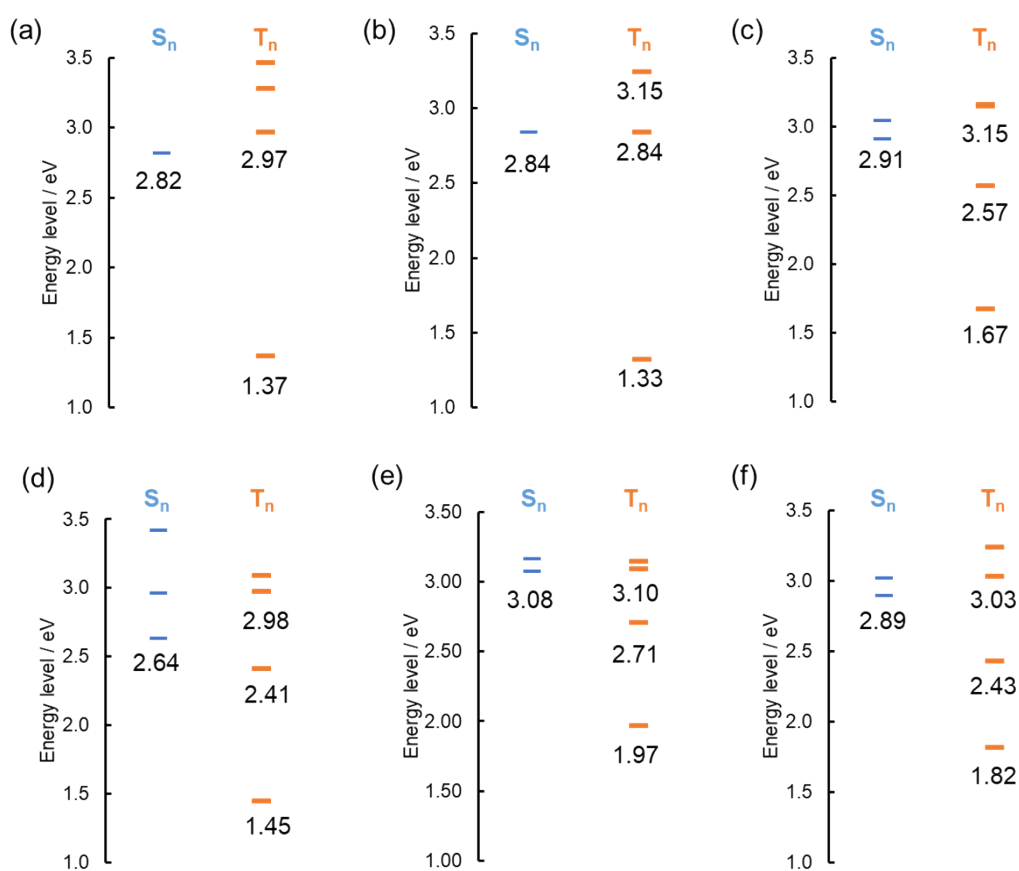**Figure S26.** Energy levels of excited singlet and triplet state relative to the ground state of

(a) **3a**, (b) **3b**, (c) **3c**, (d) **3d**, (e) **3c-P**, and (f) **3d-P** based on the  $S_1$  optimized geometries.

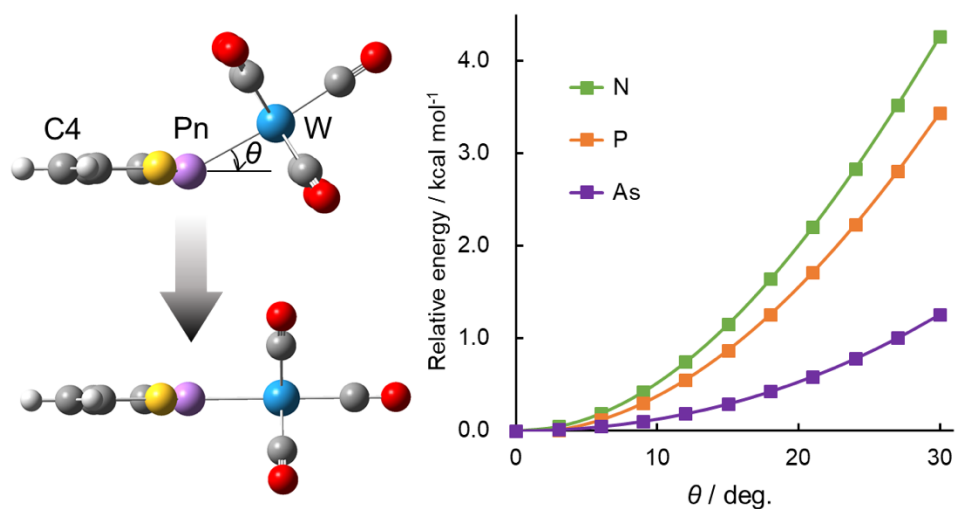

**Figure S27.** Energy plots of structures of nitrogen (green line), phosphorus (orange line) analogs of **3a-W(CO)<sub>5</sub>** (purple line) with varying angles of W-Pn-C4. The energies were calculated based on the energies of the fully-optimized structures (B3LYP-D3BJ/def2TZVP).

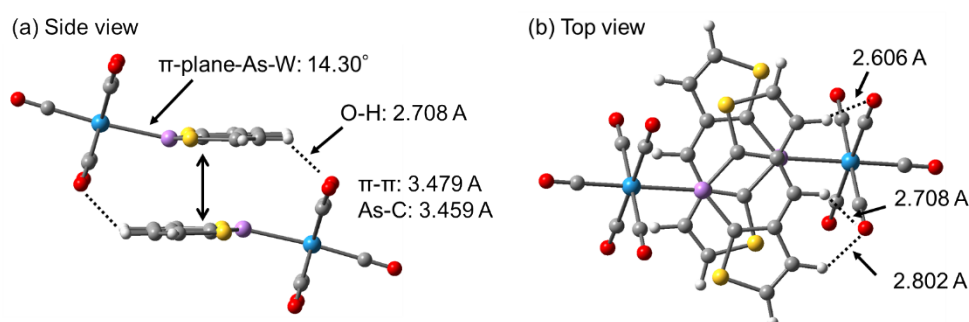

**Figure S28.** Optimized structure of stacking dimer of **3a-W(CO)<sub>5</sub>** at B3LYP-D3BJ/def2TZVP. (a) Side view, (b) top view.

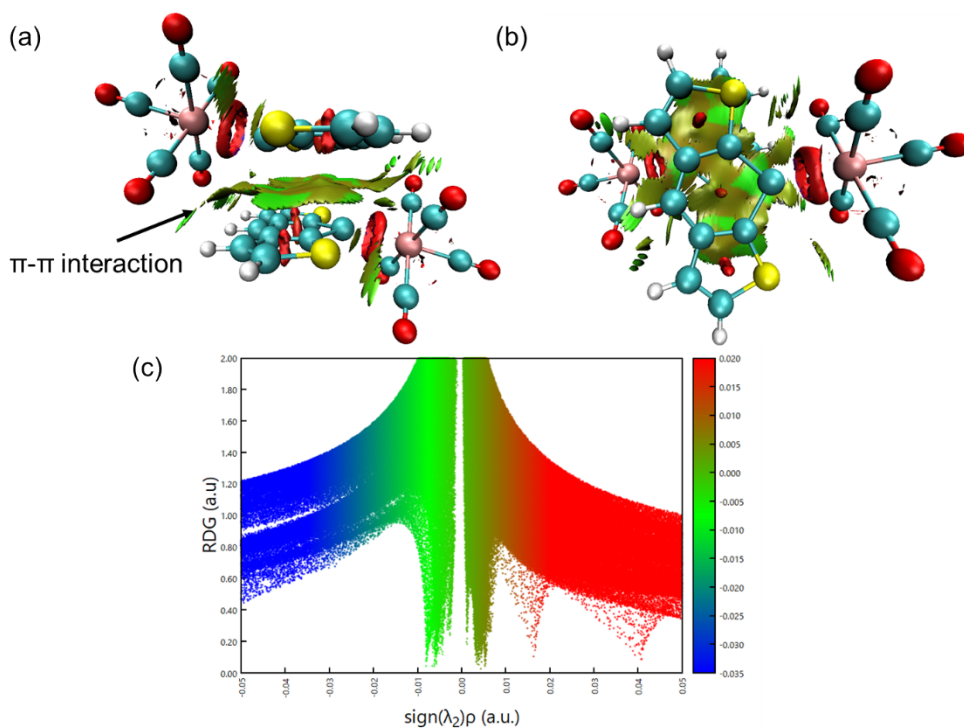

**Figure S29.** (a) (b) Noncovalent interaction (NCI) plots and (c) two-dimensional (2D) reduced density gradient (RDG) vs.  $\text{sign}(\lambda_2)\rho$  plots for stacking dimer of **3a-W(CO)<sub>5</sub>**.

### Cartesian coordinates in the structures optimized by DFT calculations

**Table S22. 3a:** E(B3LYP/def2tzvp) = -3378.43954936 hartree

| Number | Atom | X         | Y         | Z         |
|--------|------|-----------|-----------|-----------|
| 1      | C    | 3.558456  | -1.016448 | 0.000010  |
| 2      | C    | 1.375697  | 0.205892  | 0.000007  |
| 3      | C    | 1.233097  | -1.208014 | -0.000003 |
| 4      | As   | 0.000000  | 1.471643  | 0.000000  |
| 5      | C    | -1.375697 | 0.205892  | -0.000007 |
| 6      | C    | -1.233097 | -1.208014 | 0.000002  |
| 7      | C    | 0.000000  | -1.859450 | 0.000000  |
| 8      | C    | -3.558456 | -1.016447 | -0.000010 |
| 9      | H    | 0.000000  | -2.943670 | 0.000000  |
| 10     | H    | 4.609734  | -1.257635 | 0.000017  |
| 11     | H    | -4.609734 | -1.257636 | -0.000018 |
| 12     | S    | -3.059281 | 0.644449  | 0.000052  |
| 13     | S    | 3.059281  | 0.644448  | -0.000053 |

|    |   |           |           |           |
|----|---|-----------|-----------|-----------|
| 14 | C | 2.513966  | -1.871111 | 0.000009  |
| 15 | C | -2.513967 | -1.871110 | -0.000009 |
| 16 | H | -2.619110 | -2.947385 | -0.000020 |
| 17 | H | 2.619107  | -2.947386 | 0.000020  |

**Table S23. 3b:** E(B3LYP/def2tzvp) = -3378.49280209 hartree

| Number | Atom | X         | Y         | Z        |
|--------|------|-----------|-----------|----------|
| 1      | C    | -2.338602 | 1.757408  | 0.000000 |
| 2      | C    | -1.939829 | 3.053108  | 0.000000 |
| 3      | C    | -1.250988 | 0.825166  | 0.000000 |
| 4      | C    | 0.000000  | 1.490774  | 0.000000 |
| 5      | S    | -0.219308 | 3.231754  | 0.000000 |
| 6      | As   | -1.448239 | -1.036349 | 0.000000 |
| 7      | C    | 0.377332  | -1.450303 | 0.000000 |
| 8      | C    | 1.411056  | -0.481056 | 0.000000 |
| 9      | C    | 1.254567  | 0.897760  | 0.000000 |
| 10     | C    | 0.908681  | -2.780589 | 0.000000 |
| 11     | C    | 2.263739  | -2.821308 | 0.000000 |
| 12     | S    | 2.988085  | -1.250484 | 0.000000 |
| 13     | H    | 2.135035  | 1.527829  | 0.000000 |
| 14     | H    | -2.565287 | 3.931516  | 0.000000 |
| 15     | H    | -3.377071 | 1.457584  | 0.000000 |
| 16     | H    | 0.289739  | -3.666716 | 0.000000 |
| 17     | H    | 2.893310  | -3.696774 | 0.000000 |

**Table S24. 3c:** E(B3LYP/def2tzvp) = -3685.84714488 hartree

| Number | Atom | X        | Y         | Z         |
|--------|------|----------|-----------|-----------|
| 1      | C    | 5.175215 | -1.931572 | 0.000042  |
| 2      | C    | 4.117460 | -2.846685 | 0.000058  |
| 3      | C    | 2.804590 | -2.406677 | 0.000049  |
| 4      | C    | 2.527999 | -1.035358 | 0.000023  |
| 5      | C    | 3.605069 | -0.132769 | 0.000008  |
| 6      | C    | 4.927972 | -0.568136 | 0.000017  |
| 7      | C    | 1.235670 | -0.358135 | 0.000009  |
| 8      | C    | 1.378944 | 1.048569  | -0.000019 |
| 9      | S    | 3.058230 | 1.528899  | -0.000021 |

|    |    |           |           |           |
|----|----|-----------|-----------|-----------|
| 10 | C  | -1.235670 | -0.358135 | 0.000005  |
| 11 | C  | -1.378944 | 1.048569  | -0.000023 |
| 12 | C  | -2.527999 | -1.035358 | 0.000016  |
| 13 | C  | -3.605069 | -0.132769 | -0.000003 |
| 14 | S  | -3.058230 | 1.528899  | -0.000033 |
| 15 | C  | -2.804590 | -2.406677 | 0.000042  |
| 16 | C  | -4.117460 | -2.846685 | 0.000048  |
| 17 | C  | -5.175215 | -1.931572 | 0.000029  |
| 18 | C  | -4.927972 | -0.568136 | 0.000003  |
| 19 | H  | 6.196707  | -2.289712 | 0.000050  |
| 20 | H  | 4.327975  | -3.908318 | 0.000078  |
| 21 | H  | 1.996637  | -3.127283 | 0.000061  |
| 22 | H  | 5.745006  | 0.141658  | 0.000006  |
| 23 | H  | -1.996637 | -3.127283 | 0.000057  |
| 24 | H  | -4.327975 | -3.908318 | 0.000068  |
| 25 | H  | -6.196707 | -2.289712 | 0.000034  |
| 26 | H  | -5.745006 | 0.141658  | -0.000011 |
| 27 | C  | 0.000000  | -1.001045 | 0.000020  |
| 28 | As | 0.000000  | 2.312173  | -0.000045 |
| 29 | H  | 0.000000  | -2.083733 | 0.000041  |

**Table S25. 3d:** E(B3LYP/def2tzvp) = -3685.84854308 hartree

| Number | Atom | X         | Y         | Z        |
|--------|------|-----------|-----------|----------|
| 1      | C    | -0.726750 | 5.597049  | 0.000000 |
| 2      | C    | -1.862988 | 4.780139  | 0.000000 |
| 3      | C    | -1.740056 | 3.402633  | 0.000000 |
| 4      | C    | -0.469140 | 2.812691  | 0.000000 |
| 5      | C    | 0.662015  | 3.653911  | 0.000000 |
| 6      | C    | 0.542453  | 5.041112  | 0.000000 |
| 7      | C    | -0.119437 | 1.406672  | 0.000000 |
| 8      | C    | 1.276108  | 1.216066  | 0.000000 |
| 9      | S    | 2.155009  | 2.746208  | 0.000000 |
| 10     | As   | -1.352704 | -0.000001 | 0.000000 |
| 11     | C    | -0.119435 | -1.406670 | 0.000000 |
| 12     | C    | 1.276111  | -1.216069 | 0.000000 |
| 13     | C    | 1.946901  | 0.000000  | 0.000000 |

|    |   |           |           |          |
|----|---|-----------|-----------|----------|
| 14 | C | -0.469139 | -2.812690 | 0.000000 |
| 15 | C | 0.662013  | -3.653911 | 0.000000 |
| 16 | S | 2.155009  | -2.746209 | 0.000000 |
| 17 | C | -1.740056 | -3.402632 | 0.000000 |
| 18 | C | -1.862988 | -4.780137 | 0.000000 |
| 19 | C | -0.726750 | -5.597049 | 0.000000 |
| 20 | C | 0.542453  | -5.041113 | 0.000000 |
| 21 | H | -0.838193 | 6.673708  | 0.000000 |
| 22 | H | -2.846705 | 5.231287  | 0.000000 |
| 23 | H | -2.625674 | 2.779274  | 0.000000 |
| 24 | H | 1.421176  | 5.672789  | 0.000000 |
| 25 | H | 3.029843  | 0.000002  | 0.000000 |
| 26 | H | -2.625674 | -2.779273 | 0.000000 |
| 27 | H | -2.846704 | -5.231287 | 0.000000 |
| 28 | H | -0.838196 | -6.673708 | 0.000000 |
| 29 | H | 1.421177  | -5.672787 | 0.000000 |

**Table S26. 3c-P:** E(B3LYP/def2tzvp) = -1791.31651287 hartree

| Number | Atom | X         | Y         | Z         |
|--------|------|-----------|-----------|-----------|
| 1      | C    | 5.209304  | -1.582418 | 0.000036  |
| 2      | C    | 4.182956  | -2.533043 | 0.000051  |
| 3      | C    | 2.856393  | -2.137176 | 0.000042  |
| 4      | C    | 2.535407  | -0.775535 | 0.000017  |
| 5      | C    | 3.580938  | 0.164336  | 0.000003  |
| 6      | C    | 4.917426  | -0.227858 | 0.000013  |
| 7      | C    | 1.224545  | -0.143165 | 0.000003  |
| 8      | C    | 1.316572  | 1.270569  | -0.000029 |
| 9      | S    | 2.985015  | 1.808668  | -0.000022 |
| 10     | C    | -1.224545 | -0.143165 | 0.000000  |
| 11     | C    | -1.316572 | 1.270569  | -0.000029 |
| 12     | C    | -2.535407 | -0.775535 | 0.000011  |
| 13     | C    | -3.580938 | 0.164336  | -0.000008 |
| 14     | S    | -2.985015 | 1.808668  | -0.000037 |
| 15     | C    | -2.856393 | -2.137176 | 0.000037  |
| 16     | C    | -4.182956 | -2.533043 | 0.000043  |
| 17     | C    | -5.209304 | -1.582418 | 0.000023  |

|    |   |           |           |           |
|----|---|-----------|-----------|-----------|
| 18 | C | -4.917426 | -0.227858 | -0.000003 |
| 19 | H | 6.242229  | -1.906131 | 0.000044  |
| 20 | H | 4.429064  | -3.586963 | 0.000070  |
| 21 | H | 2.071801  | -2.883285 | 0.000054  |
| 22 | H | 5.711056  | 0.507983  | 0.000003  |
| 23 | H | -2.071801 | -2.883285 | 0.000053  |
| 24 | H | -4.429064 | -3.586963 | 0.000063  |
| 25 | H | -6.242229 | -1.906131 | 0.000028  |
| 26 | H | -5.711056 | 0.507983  | -0.000017 |
| 27 | C | 0.000000  | -0.803955 | 0.000016  |
| 28 | H | 0.000000  | -1.886688 | 0.000038  |
| 29 | P | 0.000000  | 2.409421  | -0.000049 |

**Table S27. 3a-W(CO)<sub>5</sub> stacking dimer: E(B3LYP/def2tzvp) = -8025.42048944 hartree**

| Number | Atom | X         | Y         | Z         |
|--------|------|-----------|-----------|-----------|
| 1      | W    | -4.531821 | 0.191050  | 0.046994  |
| 2      | S    | -1.016637 | 2.203699  | -1.866735 |
| 3      | S    | -1.997213 | -3.593465 | -0.156147 |
| 4      | O    | -3.578854 | 2.912055  | 1.445967  |
| 5      | O    | -5.562891 | -2.519237 | -1.341634 |
| 6      | O    | -4.758618 | 1.739163  | -2.761007 |
| 7      | O    | -4.399245 | -1.338223 | 2.860811  |
| 8      | C    | -4.667785 | 1.187966  | -1.765947 |
| 9      | O    | -7.535354 | 0.977892  | 0.660280  |
| 10     | C    | -4.426323 | -0.798632 | 1.851878  |
| 11     | C    | -3.898762 | 1.935388  | 0.940758  |
| 12     | C    | -5.188901 | -1.559529 | -0.850479 |
| 13     | C    | -0.910876 | 0.492065  | -1.625742 |
| 14     | C    | -0.135950 | -2.383988 | -1.534544 |
| 15     | C    | 0.597713  | -1.401030 | -2.196551 |
| 16     | H    | 1.504729  | -1.704619 | -2.701793 |
| 17     | C    | 0.222151  | -3.778383 | -1.462625 |
| 18     | H    | 1.121033  | -4.174643 | -1.911306 |
| 19     | C    | -6.446270 | 0.693333  | 0.442255  |
| 20     | C    | 0.245901  | -0.052110 | -2.245332 |
| 21     | C    | 0.454945  | 2.207945  | -2.783506 |



|    |    |           |           |           |
|----|----|-----------|-----------|-----------|
| 22 | H  | 0.830666  | 3.138080  | -3.177106 |
| 23 | C  | 1.003016  | 0.979850  | -2.908041 |
| 24 | H  | 1.919370  | 0.786948  | -3.444415 |
| 25 | C  | -1.352659 | -2.138896 | -0.840826 |
| 26 | C  | -0.665588 | -4.523292 | -0.769802 |
| 27 | H  | -0.627454 | -5.583409 | -0.577219 |
| 28 | As | -2.109969 | -0.476289 | -0.620256 |
| 29 | W  | 4.531717  | -0.191235 | -0.047077 |
| 30 | S  | 1.015787  | -2.203420 | 1.867431  |
| 31 | S  | 1.998113  | 3.593192  | 0.155984  |
| 32 | O  | 3.579174  | -2.912222 | -1.446364 |
| 33 | O  | 5.563331  | 2.518755  | 1.341736  |
| 34 | O  | 4.759148  | -1.740188 | 2.760416  |
| 35 | O  | 4.398228  | 1.338660  | -2.860513 |
| 36 | C  | 4.668190  | -1.188673 | 1.765543  |
| 37 | O  | 7.535094  | -0.977716 | -0.661609 |
| 38 | C  | 4.425664  | 0.798835  | -1.851718 |
| 39 | C  | 3.898804  | -1.935536 | -0.941026 |
| 40 | C  | 5.189113  | 1.559161  | 0.850537  |
| 41 | C  | 0.910544  | -0.491774 | 1.626201  |
| 42 | C  | 0.136355  | 2.384467  | 1.534378  |
| 43 | C  | -0.597681 | 1.401804  | 2.196414  |
| 44 | H  | -1.504763 | 1.705710  | 2.701341  |
| 45 | C  | -0.221371 | 3.778939  | 1.462151  |
| 46 | H  | -1.120216 | 4.175518  | 1.910625  |
| 47 | C  | 6.446070  | -0.693292 | -0.443113 |
| 48 | C  | -0.246209 | 0.052810  | 2.245479  |
| 49 | C  | -0.455965 | -2.207124 | 2.783932  |
| 50 | H  | -0.832020 | -3.137098 | 3.177594  |
| 51 | C  | -1.003749 | -0.978870 | 2.908158  |
| 52 | H  | -1.920153 | -0.785646 | 3.444329  |
| 53 | C  | 1.353096  | 2.138925  | 0.840886  |
| 54 | C  | 0.666660  | 4.523484  | 0.769309  |
| 55 | H  | 0.628817  | 5.583573  | 0.576514  |
| 56 | As | 2.110151  | 0.476126  | 0.620940  |

---

**Table S28. 3d\_P (S<sub>0</sub>): E(B3LYP/def2tzvp) = -1791.31773813 hartree**

| Number | Atom | X         | Y         | Z        |
|--------|------|-----------|-----------|----------|
| 1      | C    | -0.974413 | 5.514673  | 0.000000 |
| 2      | C    | -2.083414 | 4.661417  | 0.000000 |
| 3      | C    | -1.916198 | 3.288009  | 0.000000 |
| 4      | C    | -0.626902 | 2.741466  | 0.000000 |
| 5      | C    | 0.476382  | 3.617449  | 0.000000 |
| 6      | C    | 0.312335  | 5.000209  | 0.000000 |
| 7      | C    | -0.230627 | 1.343414  | 0.000000 |
| 8      | C    | 1.176138  | 1.205886  | 0.000000 |
| 9      | S    | 1.999990  | 2.759061  | 0.000000 |
| 10     | C    | -0.230627 | -1.343414 | 0.000000 |
| 11     | C    | 1.176138  | -1.205886 | 0.000000 |
| 12     | C    | 1.862641  | 0.000000  | 0.000000 |
| 13     | C    | -0.626902 | -2.741466 | 0.000000 |
| 14     | C    | 0.476382  | -3.617449 | 0.000000 |
| 15     | S    | 1.999989  | -2.759061 | 0.000000 |
| 16     | C    | -1.916199 | -3.288009 | 0.000000 |
| 17     | C    | -2.083415 | -4.661417 | 0.000000 |
| 18     | C    | -0.974413 | -5.514672 | 0.000000 |
| 19     | C    | 0.312335  | -5.000209 | 0.000000 |
| 20     | H    | -1.120535 | 6.587229  | 0.000000 |
| 21     | H    | -3.081310 | 5.080429  | 0.000000 |
| 22     | H    | -2.779425 | 2.634235  | 0.000000 |
| 23     | H    | 1.170297  | 5.659954  | 0.000000 |
| 24     | H    | 2.945323  | 0.000000  | 0.000000 |
| 25     | H    | -2.779425 | -2.634234 | 0.000000 |
| 26     | H    | -3.081310 | -5.080429 | 0.000000 |
| 27     | H    | -1.120535 | -6.587229 | 0.000000 |
| 28     | H    | 1.170296  | -5.659954 | 0.000000 |
| 29     | P    | -1.339899 | 0.000000  | 0.000000 |

**Table S29. 3d\_P\_S1 (S<sub>1</sub>): E(B3LYP/def2tzvp) = -1791.31279633 hartree**

| Number | Atom | X        | Y        | Z        |
|--------|------|----------|----------|----------|
| 1      | C    | 0.000000 | 5.502148 | 0.996038 |
| 2      | C    | 0.000000 | 4.643313 | 2.087660 |

|    |   |          |           |           |
|----|---|----------|-----------|-----------|
| 3  | C | 0.000000 | 3.261208  | 1.908533  |
| 4  | C | 0.000000 | 2.721699  | 0.610150  |
| 5  | C | 0.000000 | 3.619050  | -0.483016 |
| 6  | C | 0.000000 | 4.987860  | -0.311989 |
| 7  | C | 0.000000 | 1.344500  | 0.219167  |
| 8  | C | 0.000000 | 1.201993  | -1.196921 |
| 9  | S | 0.000000 | 2.746765  | -2.004891 |
| 10 | C | 0.000000 | -1.344500 | 0.219167  |
| 11 | C | 0.000000 | -1.201993 | -1.196921 |
| 12 | C | 0.000000 | 0.000000  | -1.909166 |
| 13 | C | 0.000000 | -2.721699 | 0.610150  |
| 14 | C | 0.000000 | -3.619050 | -0.483016 |
| 15 | S | 0.000000 | -2.746765 | -2.004891 |
| 16 | C | 0.000000 | -3.261208 | 1.908533  |
| 17 | C | 0.000000 | -4.643313 | 2.087660  |
| 18 | C | 0.000000 | -5.502148 | 0.996038  |
| 19 | C | 0.000000 | -4.987860 | -0.311989 |
| 20 | H | 0.000000 | 6.573629  | 1.145970  |
| 21 | H | 0.000000 | 5.050283  | 3.090552  |
| 22 | H | 0.000000 | 2.598695  | 2.764473  |
| 23 | H | 0.000000 | 5.657635  | -1.162226 |
| 24 | H | 0.000000 | 0.000000  | -2.989519 |
| 25 | H | 0.000000 | -2.598695 | 2.764473  |
| 26 | H | 0.000000 | -5.050283 | 3.090552  |
| 27 | H | 0.000000 | -6.573629 | 1.145970  |
| 28 | H | 0.000000 | -5.657635 | -1.162226 |
| 29 | P | 0.000000 | 0.000000  | 1.397867  |

**Table S30. 3a\_S1 (S<sub>1</sub>):** E(B3LYP/def2tzvp) = -3378.43434935 hartree

| Number | Atom | X         | Y         | Z         |
|--------|------|-----------|-----------|-----------|
| 1      | C    | 3.581079  | -1.000340 | 0.000015  |
| 2      | C    | 1.374417  | 0.173561  | -0.000005 |
| 3      | C    | 1.236431  | -1.222562 | -0.000007 |
| 4      | As   | 0.000000  | 1.512117  | 0.000000  |
| 5      | C    | -1.374417 | 0.173561  | 0.000005  |
| 6      | C    | -1.236431 | -1.222562 | 0.000007  |

|    |   |           |           |           |
|----|---|-----------|-----------|-----------|
| 7  | C | 0.000000  | -1.907192 | 0.000000  |
| 8  | C | -3.581079 | -1.000340 | -0.000014 |
| 9  | H | 0.000000  | -2.989089 | 0.000000  |
| 10 | H | 4.632075  | -1.239012 | 0.000034  |
| 11 | H | -4.632075 | -1.239012 | -0.000032 |
| 12 | S | -3.047448 | 0.621725  | 0.000052  |
| 13 | S | 3.047448  | 0.621725  | -0.000052 |
| 14 | C | 2.518803  | -1.867245 | -0.000005 |
| 15 | C | -2.518803 | -1.867245 | 0.000005  |
| 16 | H | -2.637000 | -2.942879 | -0.000007 |
| 17 | H | 2.637000  | -2.942879 | 0.000007  |

**Table S31. 3c-P\_S1 (S<sub>1</sub>): E(B3LYP/None) = -1791.31817186 hartree**

| Number | Atom | X         | Y         | Z         |
|--------|------|-----------|-----------|-----------|
| 1      | C    | 5.211685  | -1.588841 | 0.000035  |
| 2      | C    | 4.190374  | -2.534075 | 0.000053  |
| 3      | C    | 2.854516  | -2.138744 | 0.000045  |
| 4      | C    | 2.530904  | -0.773641 | 0.000018  |
| 5      | C    | 3.584667  | 0.163694  | 0.000001  |
| 6      | C    | 4.912761  | -0.219002 | 0.000009  |
| 7      | C    | 1.225665  | -0.158467 | 0.000005  |
| 8      | C    | 1.316738  | 1.265446  | -0.000021 |
| 9      | S    | 2.963925  | 1.802091  | -0.000029 |
| 10     | C    | -1.225665 | -0.158467 | 0.000002  |
| 11     | C    | -1.316738 | 1.265446  | -0.000025 |
| 12     | C    | -2.530904 | -0.773641 | 0.000011  |
| 13     | C    | -3.584667 | 0.163694  | -0.000008 |
| 14     | S    | -2.963925 | 1.802091  | -0.000038 |
| 15     | C    | -2.854516 | -2.138744 | 0.000037  |
| 16     | C    | -4.190374 | -2.534075 | 0.000041  |
| 17     | C    | -5.211685 | -1.588841 | 0.000022  |
| 18     | C    | -4.912761 | -0.219002 | -0.000003 |
| 19     | H    | 6.245717  | -1.906877 | 0.000042  |
| 20     | H    | 4.434544  | -3.588219 | 0.000073  |
| 21     | H    | 2.071999  | -2.885901 | 0.000059  |
| 22     | H    | 5.706952  | 0.515674  | -0.000004 |

|    |   |           |           |           |
|----|---|-----------|-----------|-----------|
| 23 | H | -2.071999 | -2.885901 | 0.000053  |
| 24 | H | -4.434544 | -3.588219 | 0.000061  |
| 25 | H | -6.245717 | -1.906877 | 0.000026  |
| 26 | H | -5.706952 | 0.515674  | -0.000019 |
| 27 | C | 0.000000  | -0.854473 | 0.000016  |
| 28 | H | 0.000000  | -1.933507 | 0.000035  |
| 29 | P | 0.000000  | 2.461842  | -0.000045 |

**Table S32. 3c\_S1 (S<sub>0</sub>):** E(B3LYP/def2tzvp) = -3685.84390720 hartree

| Number | Atom | X         | Y         | Z         |
|--------|------|-----------|-----------|-----------|
| 1      | C    | 5.179163  | -1.940232 | 0.000044  |
| 2      | C    | 4.128404  | -2.851768 | 0.000059  |
| 3      | C    | 2.806649  | -2.413407 | 0.000049  |
| 4      | C    | 2.523172  | -1.040591 | 0.000023  |
| 5      | C    | 3.606265  | -0.136997 | 0.000008  |
| 6      | C    | 4.921917  | -0.563782 | 0.000018  |
| 7      | C    | 1.235638  | -0.382315 | 0.000008  |
| 8      | C    | 1.373995  | 1.036254  | -0.000018 |
| 9      | S    | 3.036974  | 1.517947  | -0.000024 |
| 10     | C    | -1.235638 | -0.382315 | 0.000005  |
| 11     | C    | -1.373995 | 1.036254  | -0.000021 |
| 12     | C    | -2.523172 | -1.040591 | 0.000016  |
| 13     | C    | -3.606265 | -0.136997 | -0.000002 |
| 14     | S    | -3.036974 | 1.517947  | -0.000032 |
| 15     | C    | -2.806649 | -2.413407 | 0.000041  |
| 16     | C    | -4.128404 | -2.851768 | 0.000048  |
| 17     | C    | -5.179163 | -1.940232 | 0.000030  |
| 18     | C    | -4.921917 | -0.563782 | 0.000005  |
| 19     | H    | 6.202675  | -2.291289 | 0.000052  |
| 20     | H    | 4.338662  | -3.913432 | 0.000080  |
| 21     | H    | 2.001269  | -3.135898 | 0.000062  |
| 22     | H    | 5.738245  | 0.146833  | 0.000006  |
| 23     | H    | -2.001269 | -3.135898 | 0.000055  |
| 24     | H    | -4.338662 | -3.913432 | 0.000067  |
| 25     | H    | -6.202675 | -2.291289 | 0.000035  |
| 26     | H    | -5.738245 | 0.146833  | -0.000009 |

|    |    |          |           |           |
|----|----|----------|-----------|-----------|
| 27 | C  | 0.000000 | -1.057620 | 0.000019  |
| 28 | As | 0.000000 | 2.357885  | -0.000045 |
| 29 | H  | 0.000000 | -2.137183 | 0.000038  |

**Table S33. 3d'** ( $S_0$ ): E(B3LYP/def2tzvp) = -7370.48872066 hartree

| Number | Atom | X         | Y         | Z         |
|--------|------|-----------|-----------|-----------|
| 1      | C    | 0.000000  | 0.000000  | 0.748125  |
| 2      | C    | 0.000000  | 1.217370  | 1.438304  |
| 3      | C    | 0.000000  | -1.217370 | 1.438304  |
| 4      | C    | 0.000000  | 1.401607  | 2.835631  |
| 5      | S    | 0.000000  | 2.754090  | 0.569997  |
| 6      | C    | 0.000000  | 0.000000  | -0.748125 |
| 7      | C    | 0.000000  | -1.401607 | 2.835631  |
| 8      | S    | 0.000000  | -2.754090 | 0.569997  |
| 9      | C    | 0.000000  | 2.805195  | 3.194288  |
| 10     | As   | 0.000000  | 0.000000  | 4.069387  |
| 11     | C    | 0.000000  | 3.651019  | 2.068205  |
| 12     | C    | 1.217370  | 0.000000  | -1.438304 |
| 13     | C    | -1.217370 | 0.000000  | -1.438304 |
| 14     | C    | 0.000000  | -2.805195 | 3.194288  |
| 15     | C    | 0.000000  | -3.651019 | 2.068205  |
| 16     | C    | 0.000000  | 3.387004  | 4.469065  |
| 17     | C    | 0.000000  | 5.037853  | 2.195067  |
| 18     | C    | 1.401607  | 0.000000  | -2.835631 |
| 19     | S    | 2.754090  | 0.000000  | -0.569997 |
| 20     | C    | -1.401607 | 0.000000  | -2.835631 |
| 21     | S    | -2.754090 | 0.000000  | -0.569997 |
| 22     | C    | 0.000000  | -3.387004 | 4.469065  |
| 23     | C    | 0.000000  | -5.037853 | 2.195067  |
| 24     | C    | 0.000000  | 4.763864  | 4.599357  |
| 25     | H    | 0.000000  | 2.758911  | 5.351364  |
| 26     | C    | 0.000000  | 5.586822  | 3.467257  |
| 27     | H    | 0.000000  | 5.674019  | 1.319577  |
| 28     | C    | 2.805195  | 0.000000  | -3.194288 |
| 29     | As   | 0.000000  | 0.000000  | -4.069387 |
| 30     | C    | 3.651019  | 0.000000  | -2.068205 |

|    |   |           |           |           |
|----|---|-----------|-----------|-----------|
| 31 | C | -2.805195 | 0.000000  | -3.194288 |
| 32 | C | -3.651019 | 0.000000  | -2.068205 |
| 33 | C | 0.000000  | -4.763864 | 4.599357  |
| 34 | H | 0.000000  | -2.758911 | 5.351364  |
| 35 | C | 0.000000  | -5.586822 | 3.467257  |
| 36 | H | 0.000000  | -5.674019 | 1.319577  |
| 37 | H | 0.000000  | 5.209801  | 5.585470  |
| 38 | H | 0.000000  | 6.662892  | 3.584577  |
| 39 | C | 3.387004  | 0.000000  | -4.469065 |
| 40 | C | 5.037853  | 0.000000  | -2.195067 |
| 41 | C | -3.387004 | 0.000000  | -4.469065 |
| 42 | C | -5.037853 | 0.000000  | -2.195067 |
| 43 | H | 0.000000  | -5.209801 | 5.585470  |
| 44 | H | 0.000000  | -6.662892 | 3.584577  |
| 45 | C | 4.763864  | 0.000000  | -4.599357 |
| 46 | H | 2.758911  | 0.000000  | -5.351364 |
| 47 | C | 5.586822  | 0.000000  | -3.467257 |
| 48 | H | 5.674019  | 0.000000  | -1.319577 |
| 49 | C | -4.763864 | 0.000000  | -4.599357 |
| 50 | H | -2.758911 | 0.000000  | -5.351364 |
| 51 | C | -5.586822 | 0.000000  | -3.467257 |
| 52 | H | -5.674019 | 0.000000  | -1.319577 |
| 53 | H | 5.209801  | 0.000000  | -5.585470 |
| 54 | H | 6.662892  | 0.000000  | -3.584577 |
| 55 | H | -5.209801 | 0.000000  | -5.585470 |
| 56 | H | -6.662892 | 0.000000  | -3.584577 |

**Table S34. 3d\_S1** ( $S_1$ ): E(B3LYP/def2tzvp) = -3685.84451172 hartree

| Number | Atom | X         | Y        | Z        |
|--------|------|-----------|----------|----------|
| 1      | C    | -0.690527 | 5.618295 | 0.000000 |
| 2      | C    | -1.828105 | 4.796634 | 0.000000 |
| 3      | C    | -1.724046 | 3.414995 | 0.000000 |
| 4      | C    | -0.456220 | 2.811862 | 0.000000 |
| 5      | C    | 0.684491  | 3.668262 | 0.000000 |
| 6      | C    | 0.577193  | 5.057201 | 0.000000 |
| 7      | C    | -0.113340 | 1.420233 | 0.000000 |

|    |    |           |           |          |
|----|----|-----------|-----------|----------|
| 8  | C  | 1.264029  | 1.214463  | 0.000000 |
| 9  | S  | 2.141824  | 2.743045  | 0.000000 |
| 10 | As | -1.405785 | 0.000000  | 0.000000 |
| 11 | C  | -0.113340 | -1.420233 | 0.000000 |
| 12 | C  | 1.264029  | -1.214464 | 0.000000 |
| 13 | C  | 1.962940  | 0.000000  | 0.000000 |
| 14 | C  | -0.456220 | -2.811862 | 0.000000 |
| 15 | C  | 0.684491  | -3.668262 | 0.000000 |
| 16 | S  | 2.141824  | -2.743045 | 0.000000 |
| 17 | C  | -1.724046 | -3.414995 | 0.000000 |
| 18 | C  | -1.828105 | -4.796634 | 0.000000 |
| 19 | C  | -0.690527 | -5.618295 | 0.000000 |
| 20 | C  | 0.577193  | -5.057201 | 0.000000 |
| 21 | H  | -0.803335 | 6.694201  | 0.000000 |
| 22 | H  | -2.809258 | 5.254632  | 0.000000 |
| 23 | H  | -2.614184 | 2.799255  | 0.000000 |
| 24 | H  | 1.461345  | 5.681181  | 0.000000 |
| 25 | H  | 3.044083  | 0.000000  | 0.000000 |
| 26 | H  | -2.614184 | -2.799254 | 0.000000 |
| 27 | H  | -2.809259 | -5.254631 | 0.000000 |
| 28 | H  | -0.803336 | -6.694201 | 0.000000 |
| 29 | H  | 1.461345  | -5.681181 | 0.000000 |

**Table S35. 3b** ( $S_1$ ): E(B3LYP/def2tzvp) = -3378.48830985 hartree

| Number | Atom | X          | Y          | Z         |
|--------|------|------------|------------|-----------|
| 1      | C    | -0.8555250 | 2.7951210  | 0.0000000 |
| 2      | C    | 0.2299040  | 3.6422980  | 0.0000000 |
| 3      | C    | -0.5147680 | 1.4163600  | 0.0000000 |
| 4      | C    | 0.8714820  | 1.2165980  | 0.0000000 |
| 5      | S    | 1.6977670  | 2.7579820  | 0.0000000 |
| 6      | As   | -1.8154790 | -0.0000110 | 0.0000000 |
| 7      | C    | -0.5147560 | -1.4163620 | 0.0000000 |
| 8      | C    | 0.8714950  | -1.2165900 | 0.0000000 |
| 9      | C    | 1.5719780  | 0.0000110  | 0.0000000 |
| 10     | C    | -0.8555250 | -2.7951200 | 0.0000000 |
| 11     | C    | 0.2299040  | -3.6422910 | 0.0000000 |



|    |   |            |            |           |
|----|---|------------|------------|-----------|
| 12 | S | 1.6977710  | -2.7579710 | 0.0000000 |
| 13 | H | 2.6525810  | 0.0000120  | 0.0000000 |
| 14 | H | 0.2377960  | 4.7191590  | 0.0000000 |
| 15 | H | -1.8755610 | 3.1548510  | 0.0000000 |
| 16 | H | -1.8755680 | -3.1548310 | 0.0000000 |
| 17 | H | 0.2377910  | -4.7191520 | 0.0000000 |

---

## 9. NMR Spectra

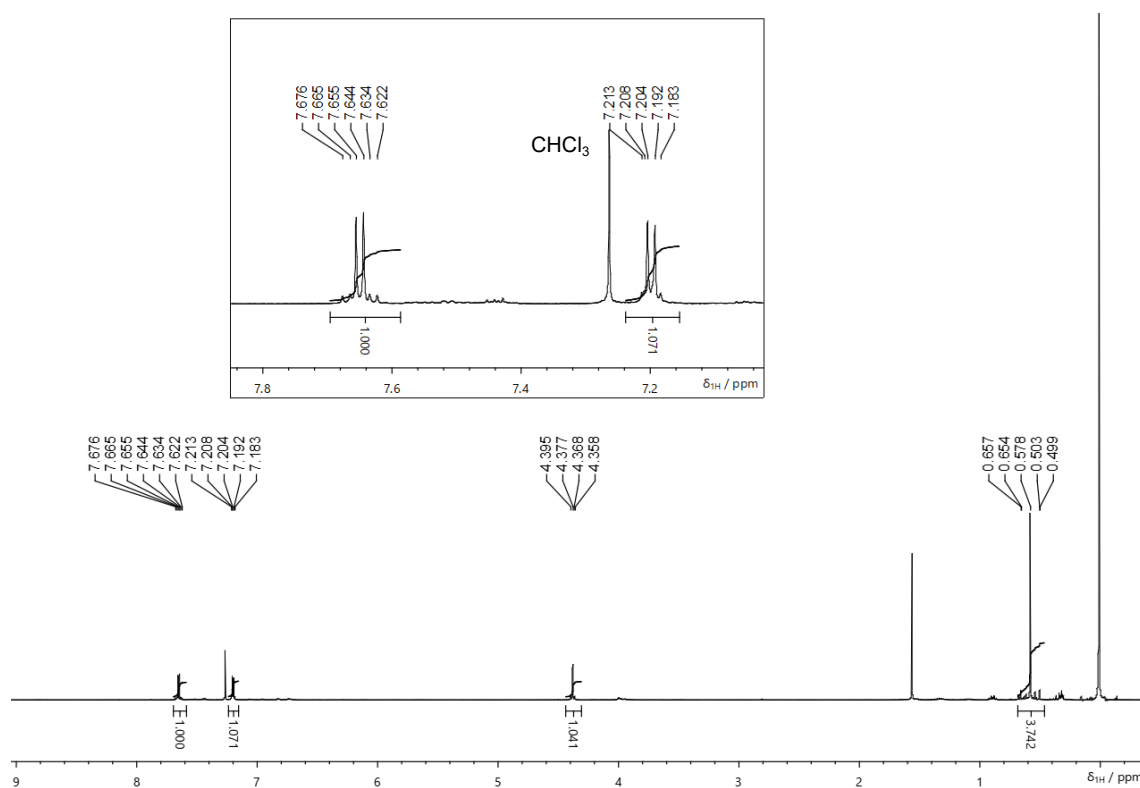

**Figure S30.**  $^1\text{H-NMR}$  spectrum (400 MHz) of crude **2a** in  $\text{CDCl}_3$

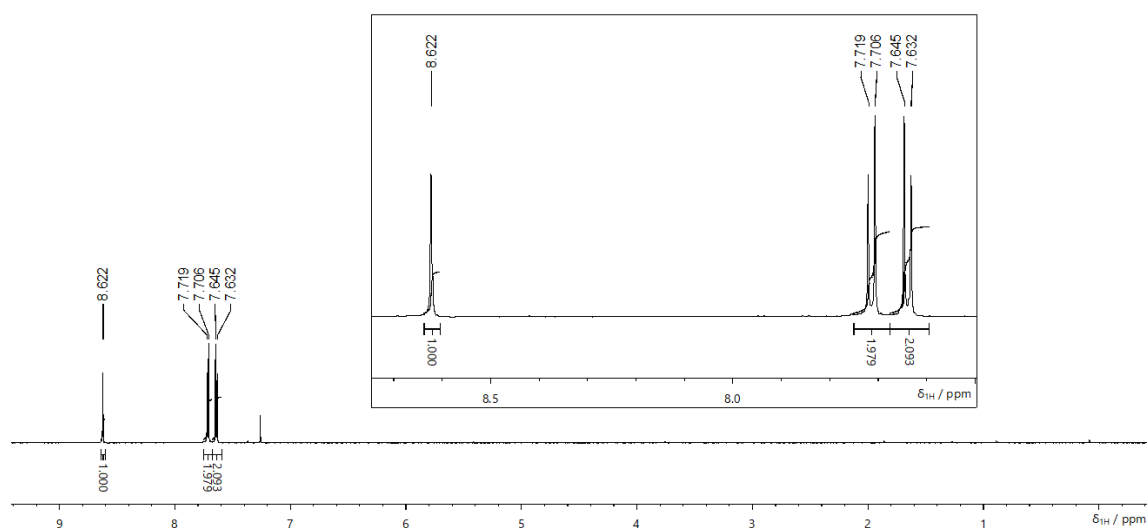

**Figure S31.**  $^1\text{H-NMR}$  spectrum (400 MHz) of **3a** in  $\text{CDCl}_3$ .

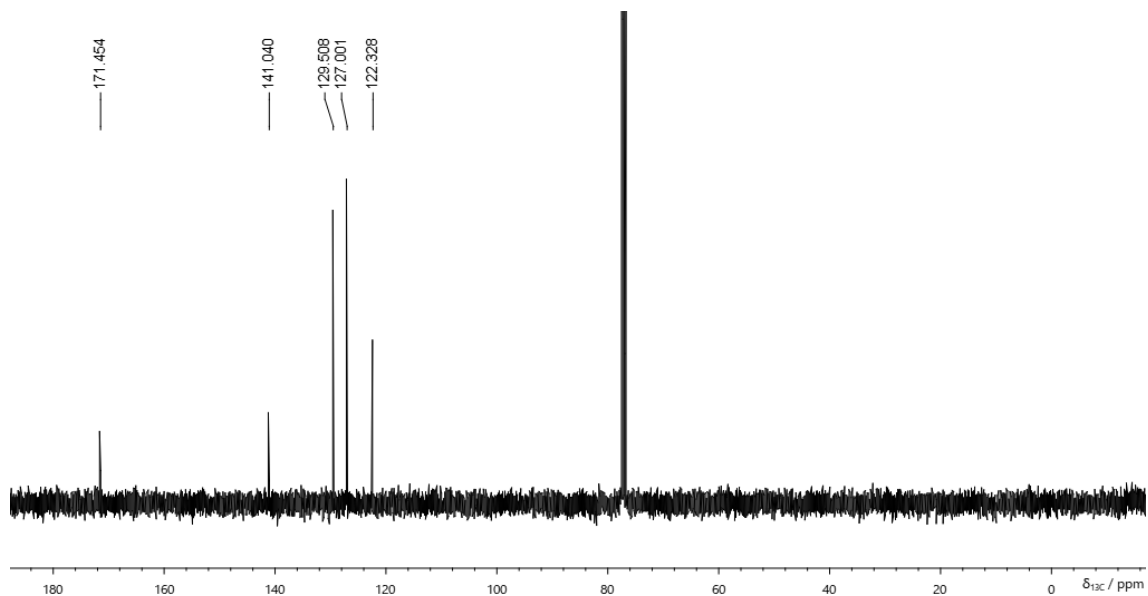

**Figure S32.**  $^{13}\text{C}$ -NMR spectrum (100 MHz) of **3a** in  $\text{CDCl}_3$ .

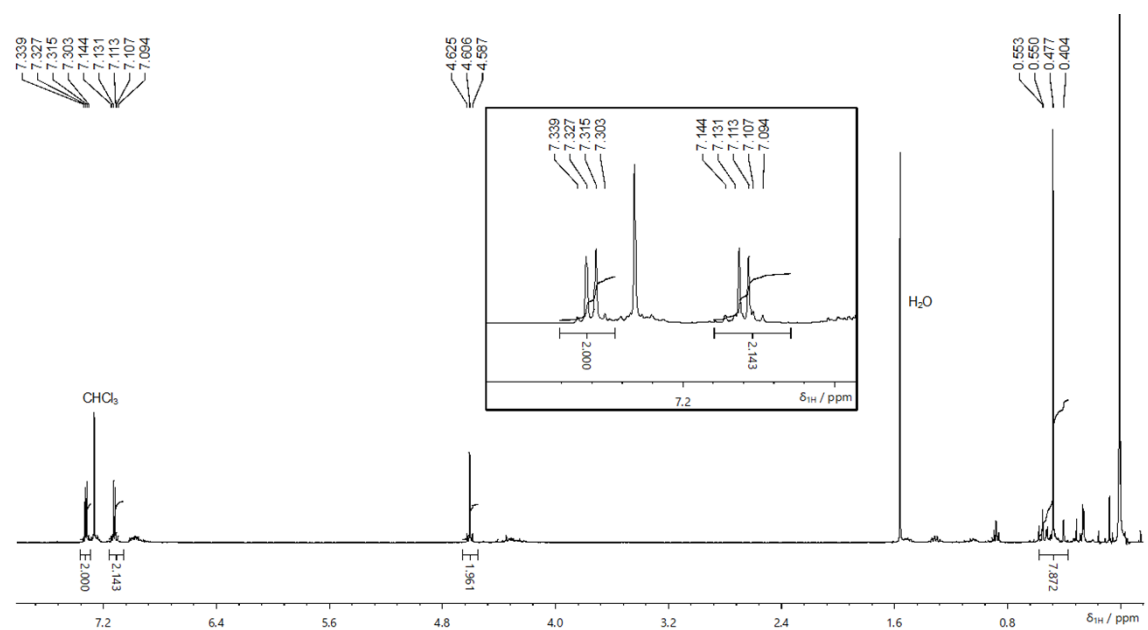

**Figure S33.**  $^1\text{H}$ -NMR spectrum (400 MHz) of crude **2b** in  $\text{CDCl}_3$ .

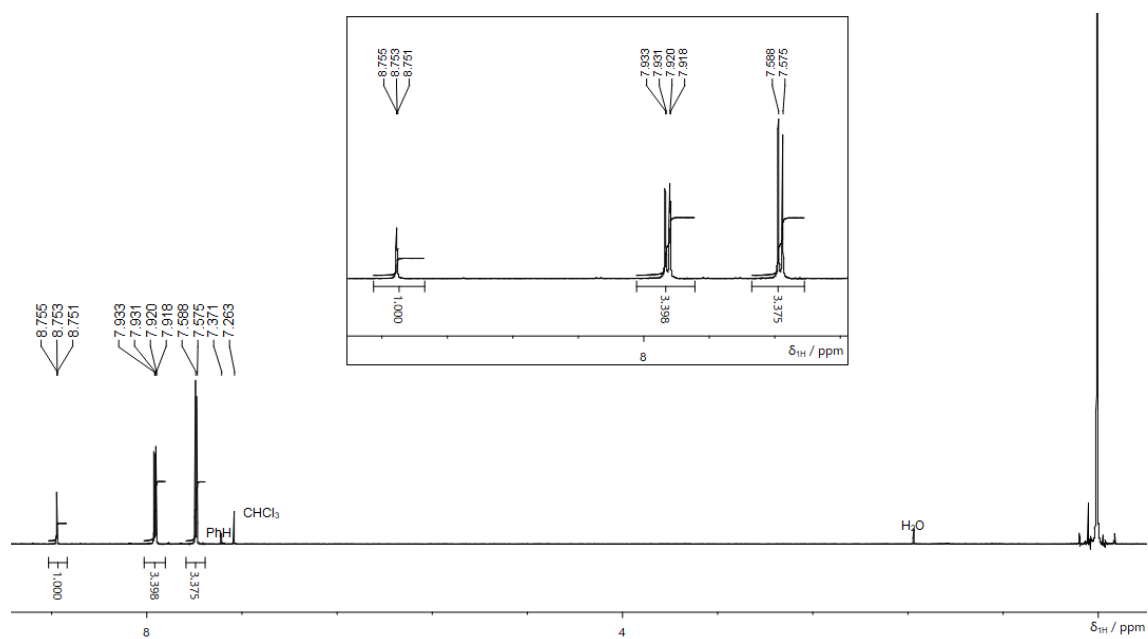

**Figure S34.** <sup>1</sup>H-NMR spectrum (100 MHz) of **3b** in CDCl<sub>3</sub>.

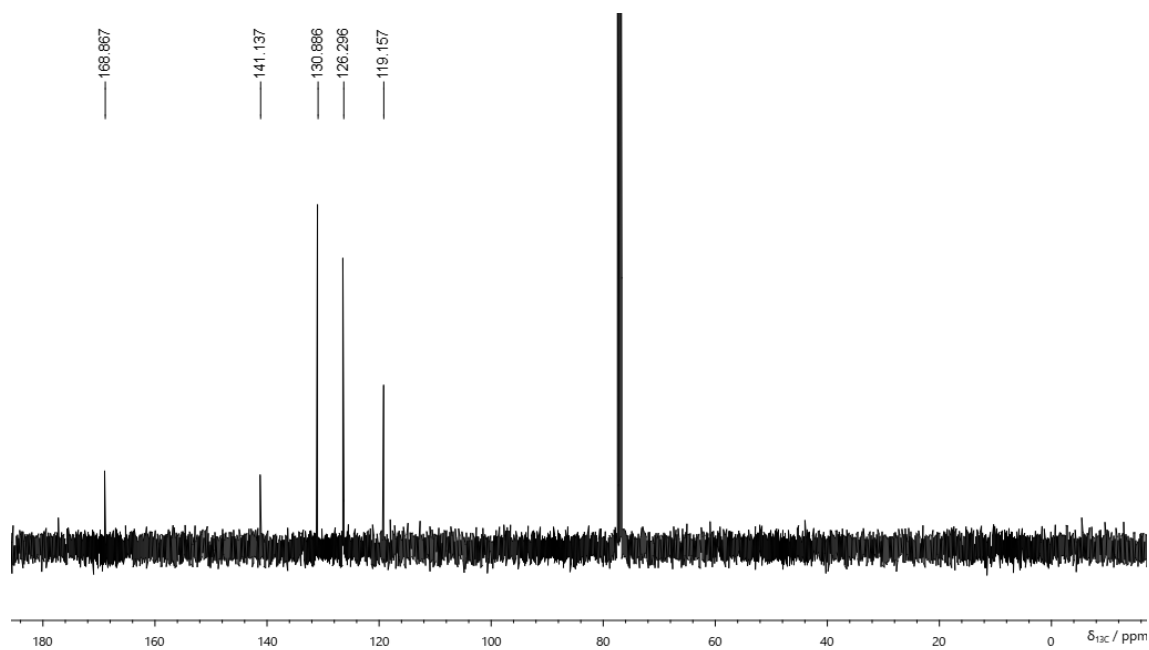

**Figure S35.** <sup>13</sup>C-NMR spectrum (400 MHz) of **3b** in CDCl<sub>3</sub>.

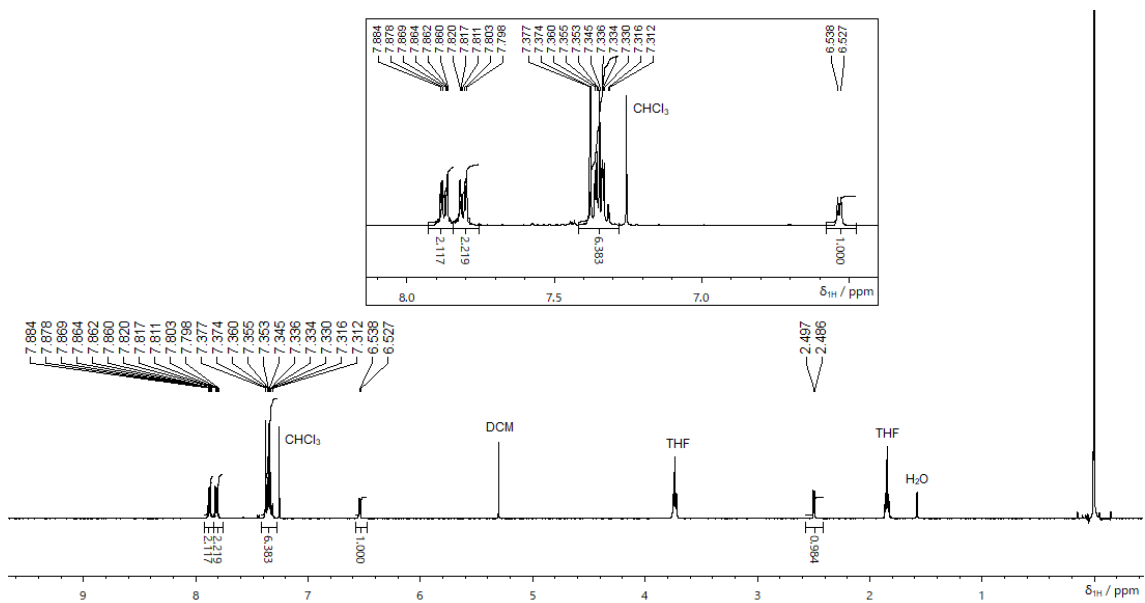

Figure S36.  $^1\text{H-NMR}$  spectrum (400 MHz) of crude bis-3-benzo[*b*]thienylmethanol in  $\text{CDCl}_3$ .

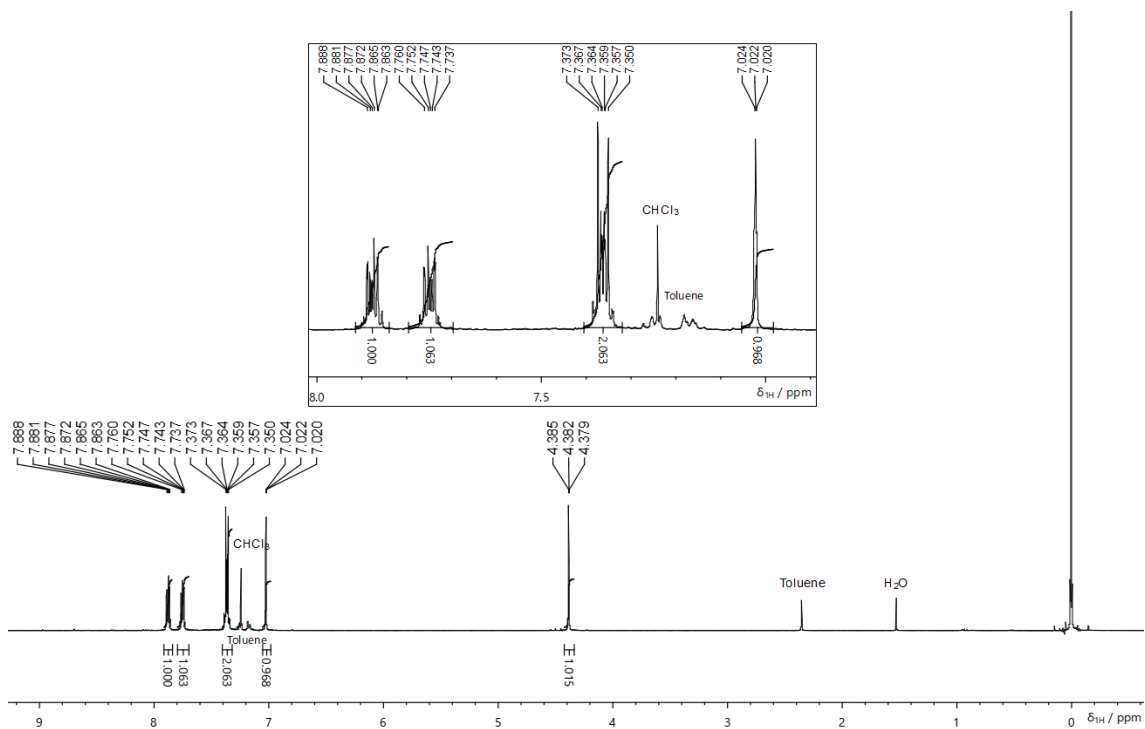

Figure S37.  $^1\text{H-NMR}$  spectrum (400 MHz) of crude bis-3-benzo[*b*]thienylmethane in  $\text{CDCl}_3$ .

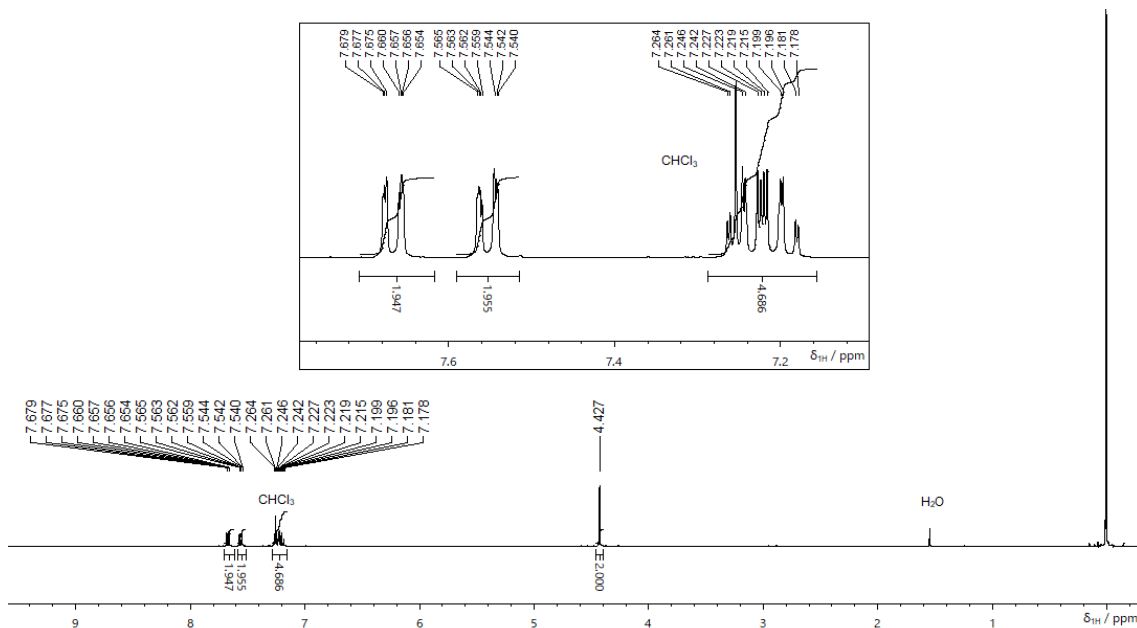

**Figure S38.**  $^1\text{H-NMR}$  spectrum (400 MHz) of bis-3-(2-bromobenzo[*b*]thienyl)methane in  $\text{CDCl}_3$ .

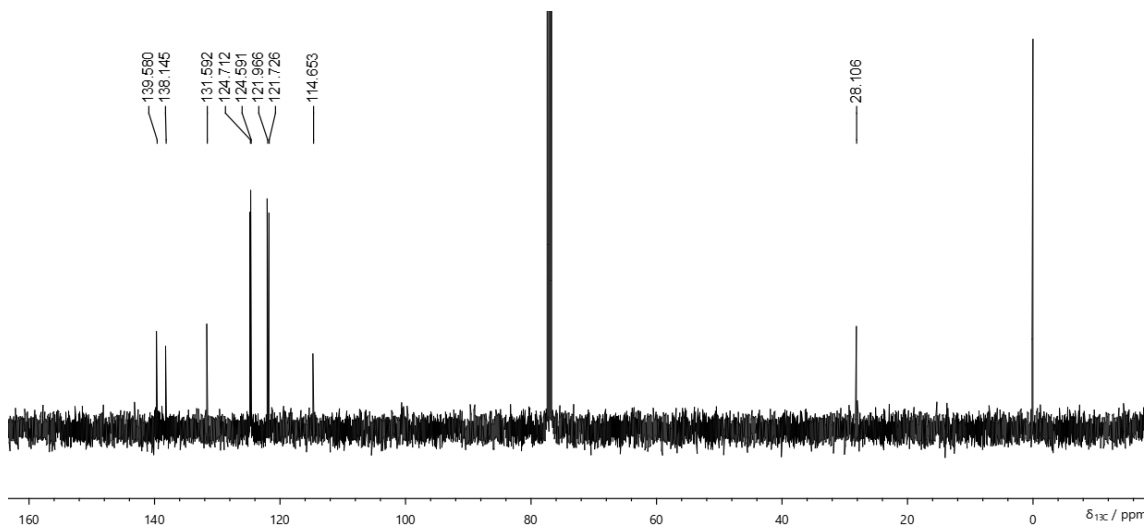

**Figure S39.**  $^{13}\text{C-NMR}$  spectrum (100 MHz) of bis-3-(2-bromobenzo[*b*]thienyl)methane in  $\text{CDCl}_3$ .

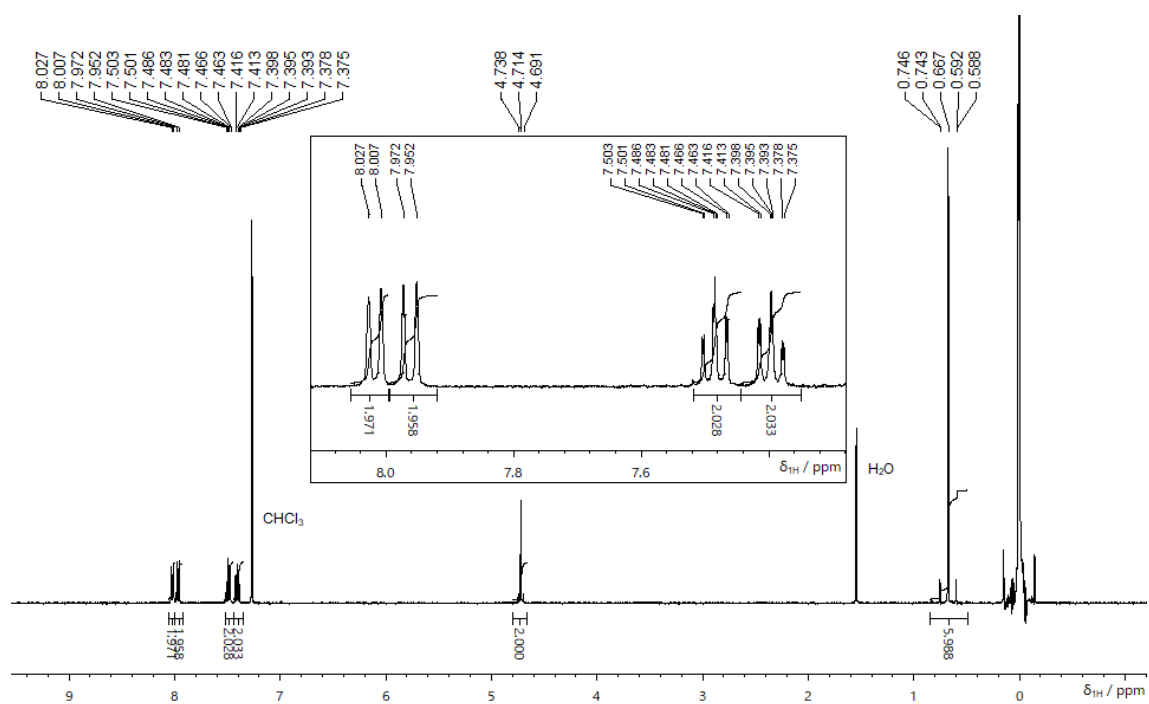

**Figure S40.** <sup>1</sup>H-NMR spectrum (400 MHz) of **2c** in CDCl<sub>3</sub>.

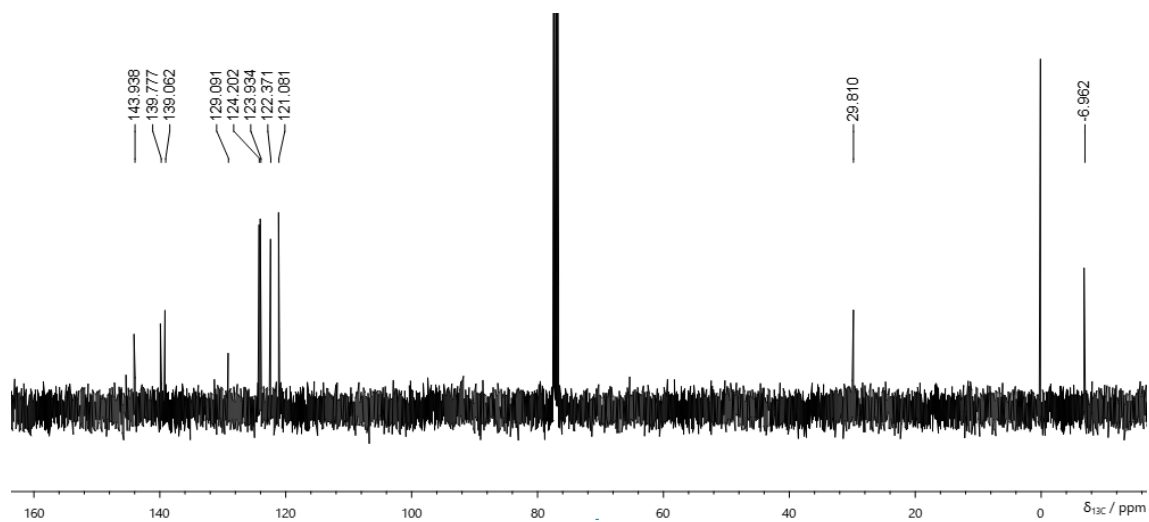

**Figure S41.** <sup>13</sup>C-NMR spectrum (100 MHz) of **2c** in CDCl<sub>3</sub>.

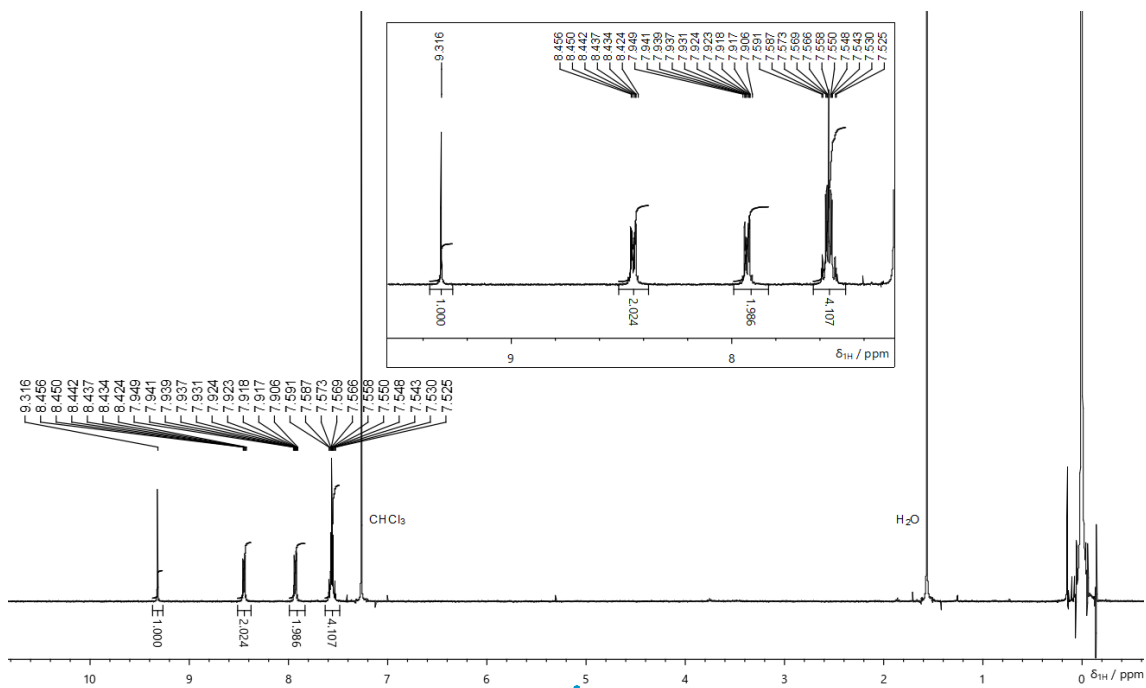

**Figure S42.**  $^1\text{H-NMR}$  spectrum (400 MHz) of **3c** in  $\text{CDCl}_3$ .

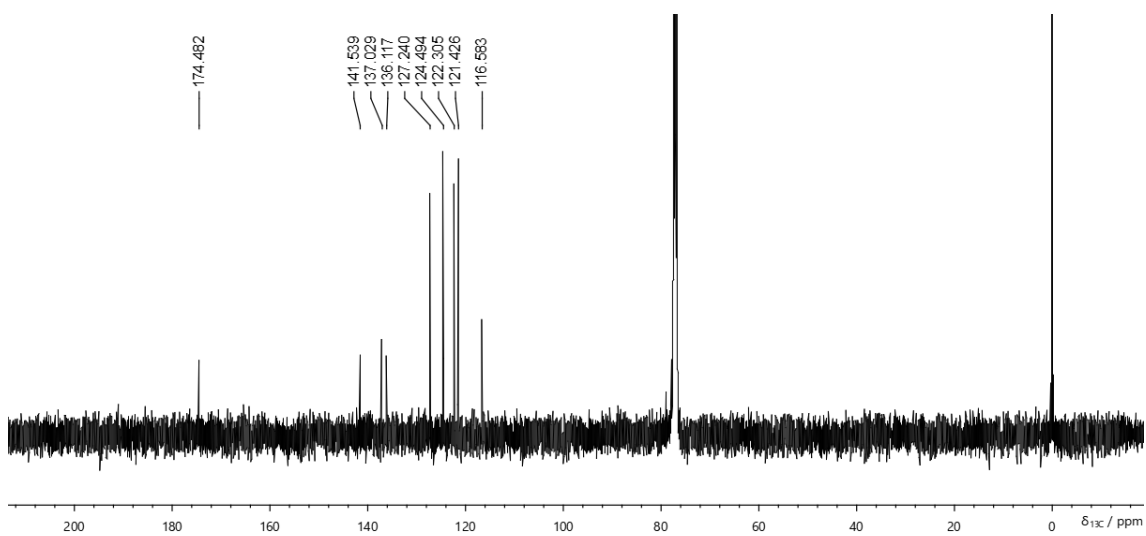

**Figure S43.**  $^{13}\text{C-NMR}$  spectrum (100 MHz) of **3c** in  $\text{CDCl}_3$ .



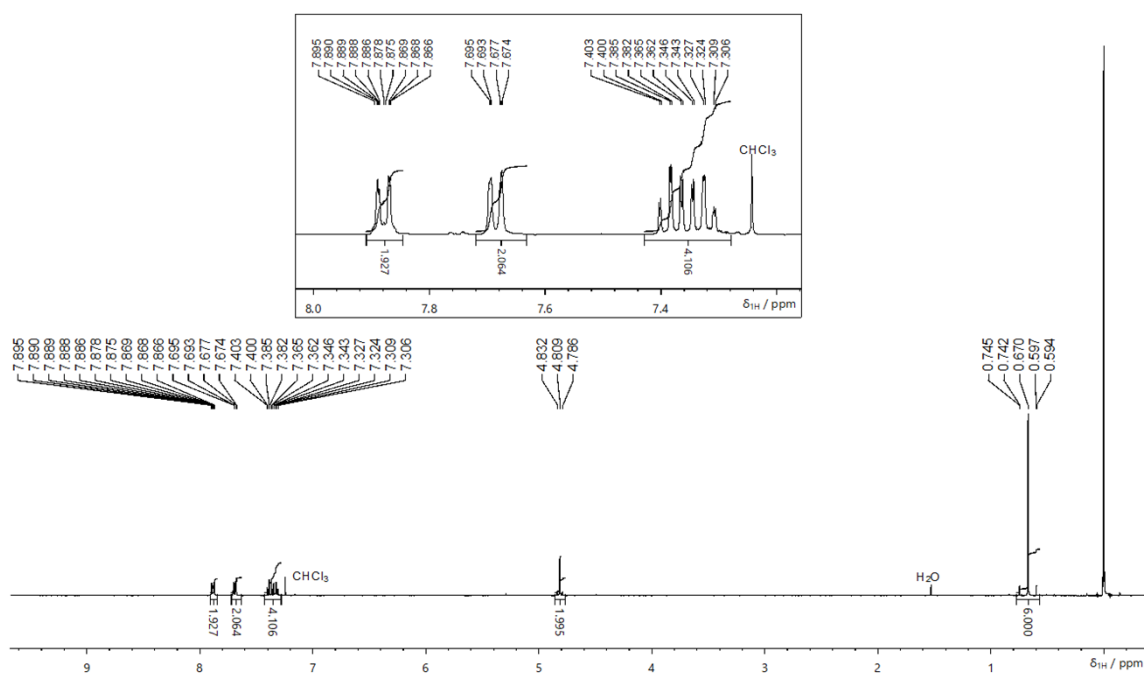

Figure S44.  $^1\text{H-NMR}$  spectrum (400 MHz) of **2d** in  $\text{CDCl}_3$ .

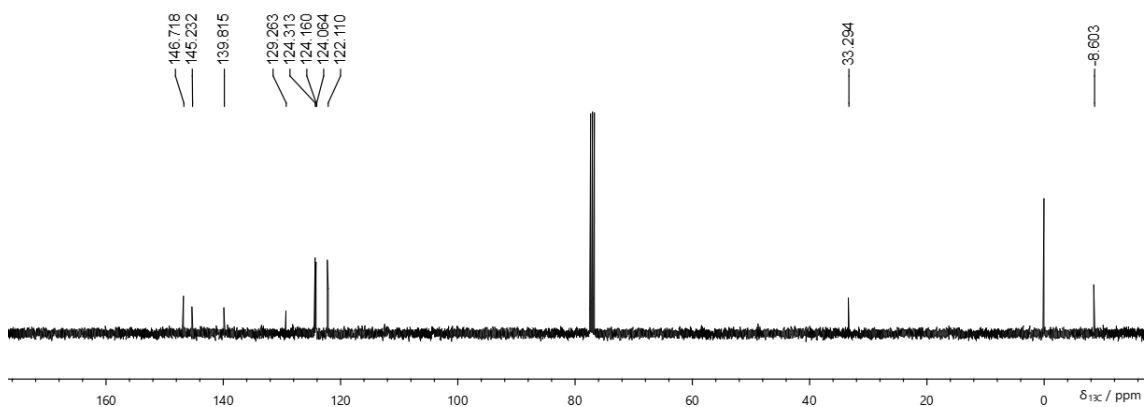

Figure S45.  $^{13}\text{C-NMR}$  spectrum (100 MHz) of **2d** in  $\text{CDCl}_3$ .

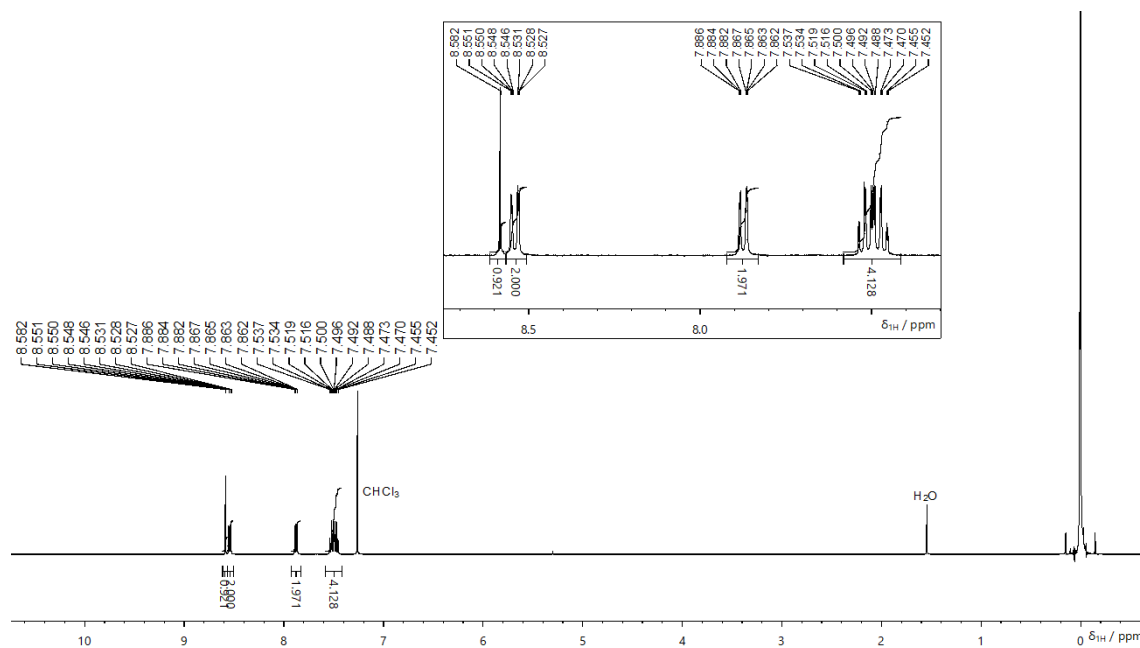

**Figure S46.** <sup>1</sup>H-NMR spectrum (400 MHz) of **3d** in CDCl<sub>3</sub>.

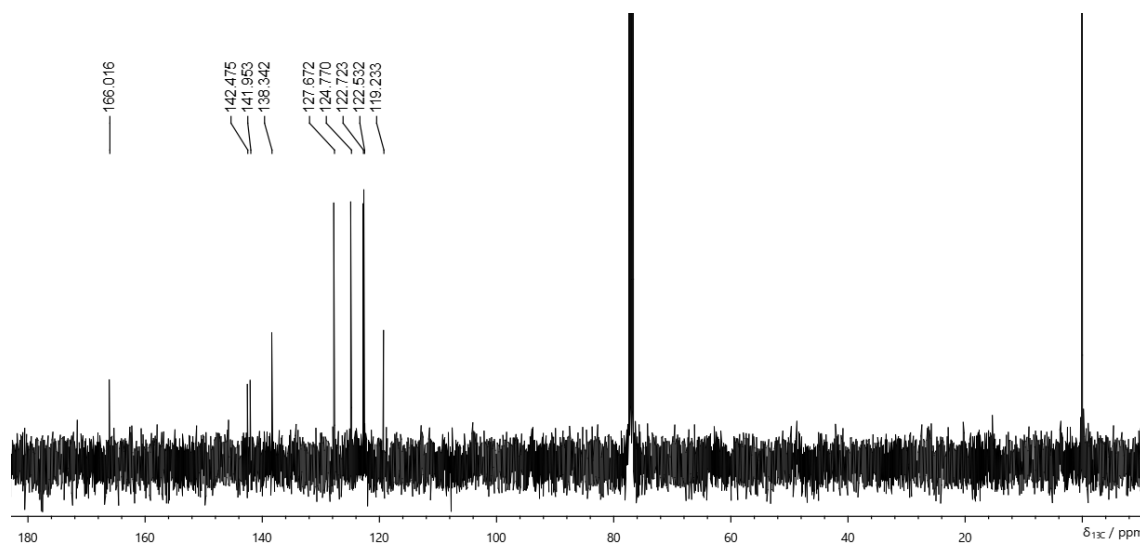

**Figure S47.** <sup>13</sup>C-NMR spectrum (100 MHz) of **3d** in CDCl<sub>3</sub>.

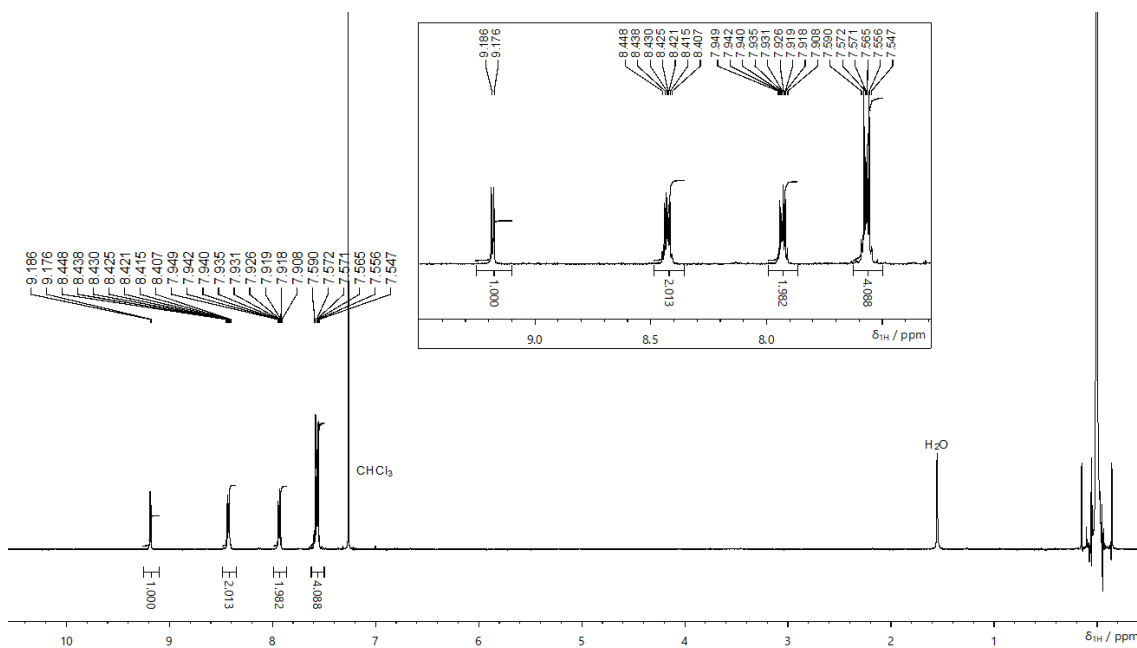

**Figure S48.**  $^1\text{H-NMR}$  spectrum (400 MHz) of **3c-P** in  $\text{CDCl}_3$ .

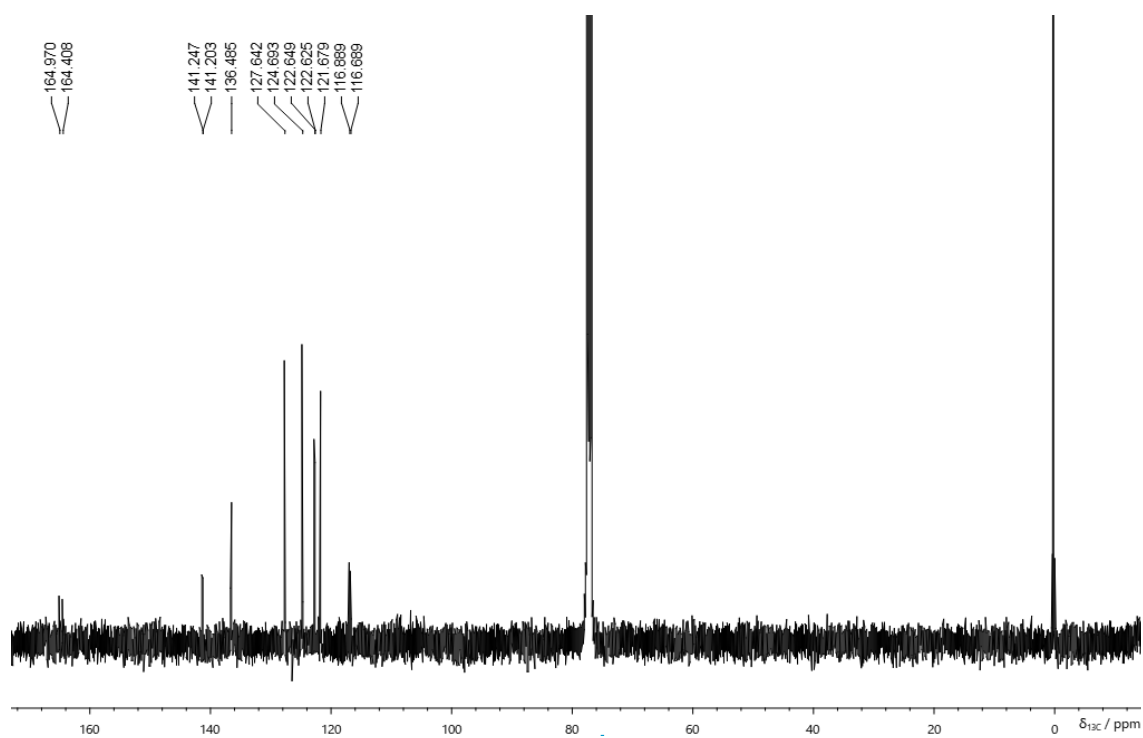

**Figure S49.**  $^{13}\text{C-NMR}$  spectrum (100 MHz) of **3c-P** in  $\text{CDCl}_3$ .

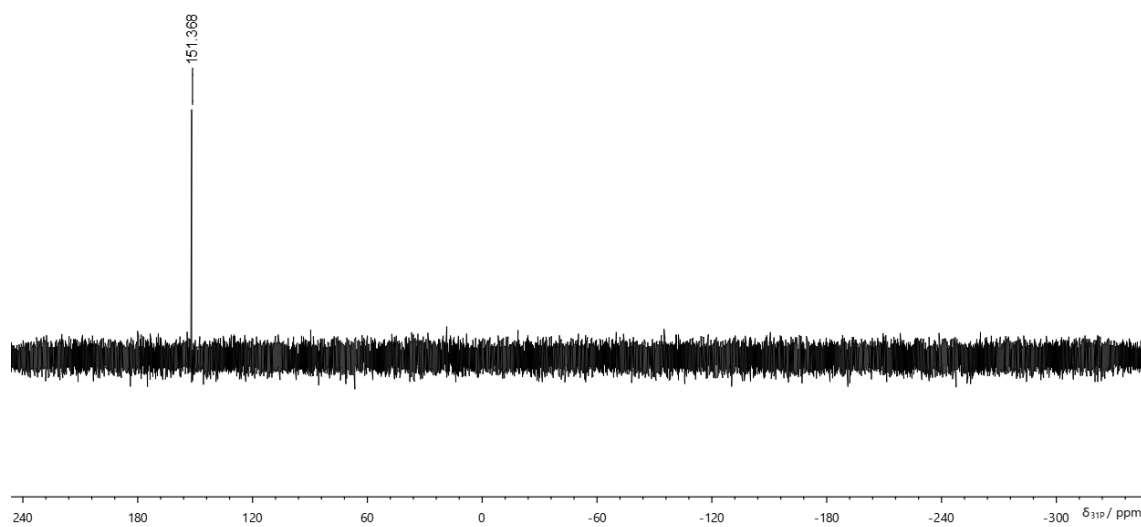

**Figure S50.**  $^{31}\text{P}$ -NMR spectrum (162 MHz) of **3c-P** in  $\text{CDCl}_3$ .

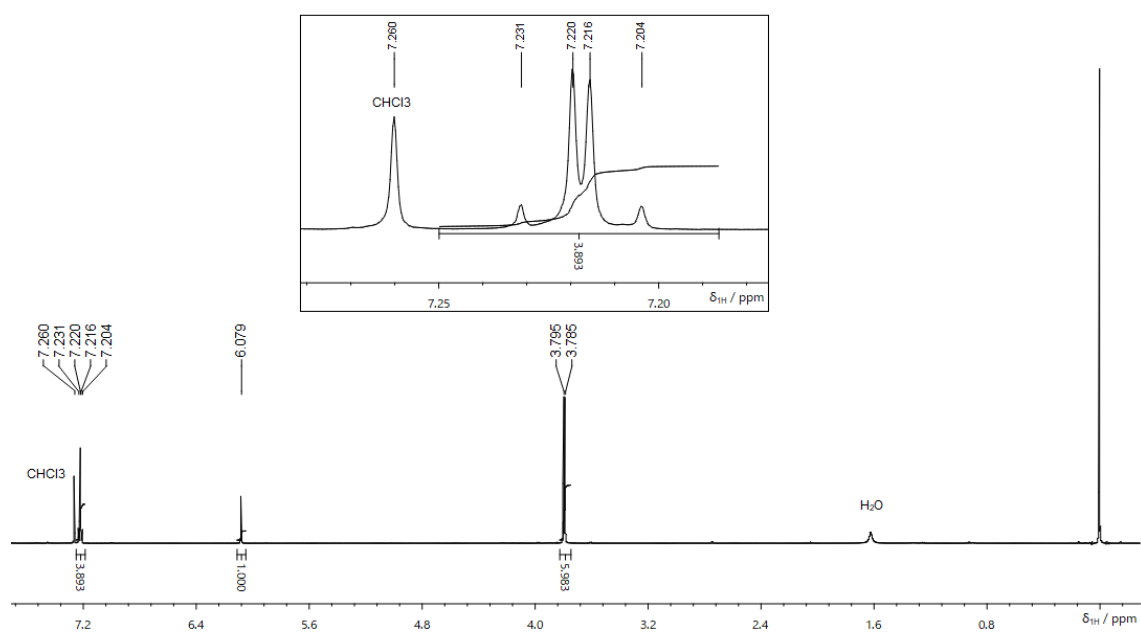

**Figure S51.**  $^1\text{H}$ -NMR spectrum (400 MHz) of **3a-DMAD** in  $\text{CDCl}_3$ .

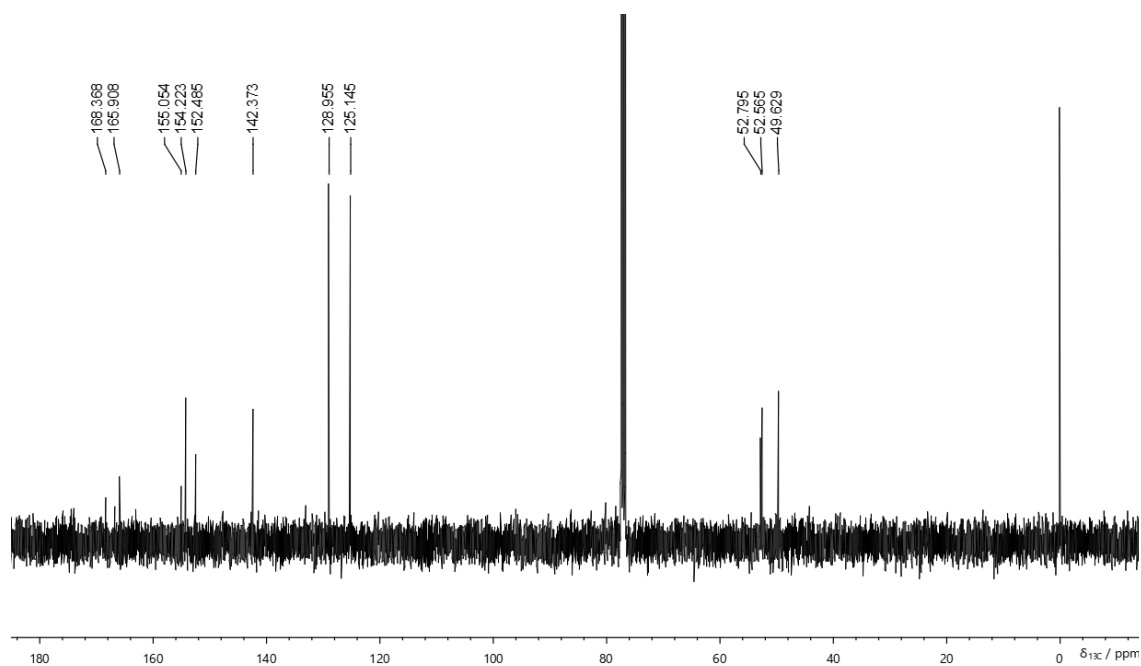

**Figure S52.**  $^{13}\text{C}$ -NMR spectrum (100 MHz) of **3a-DMAD** in  $\text{CDCl}_3$ .

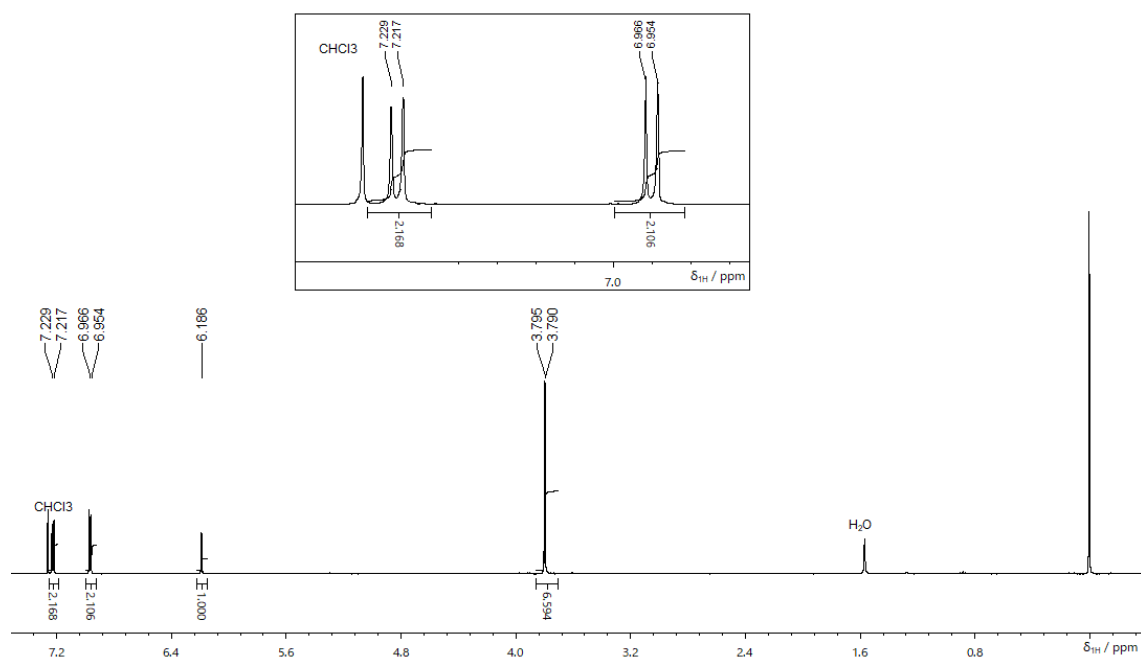

**Figure S53.**  $^1\text{H}$ -NMR spectrum (400 MHz) of **3b-DMAD** in  $\text{CDCl}_3$ .

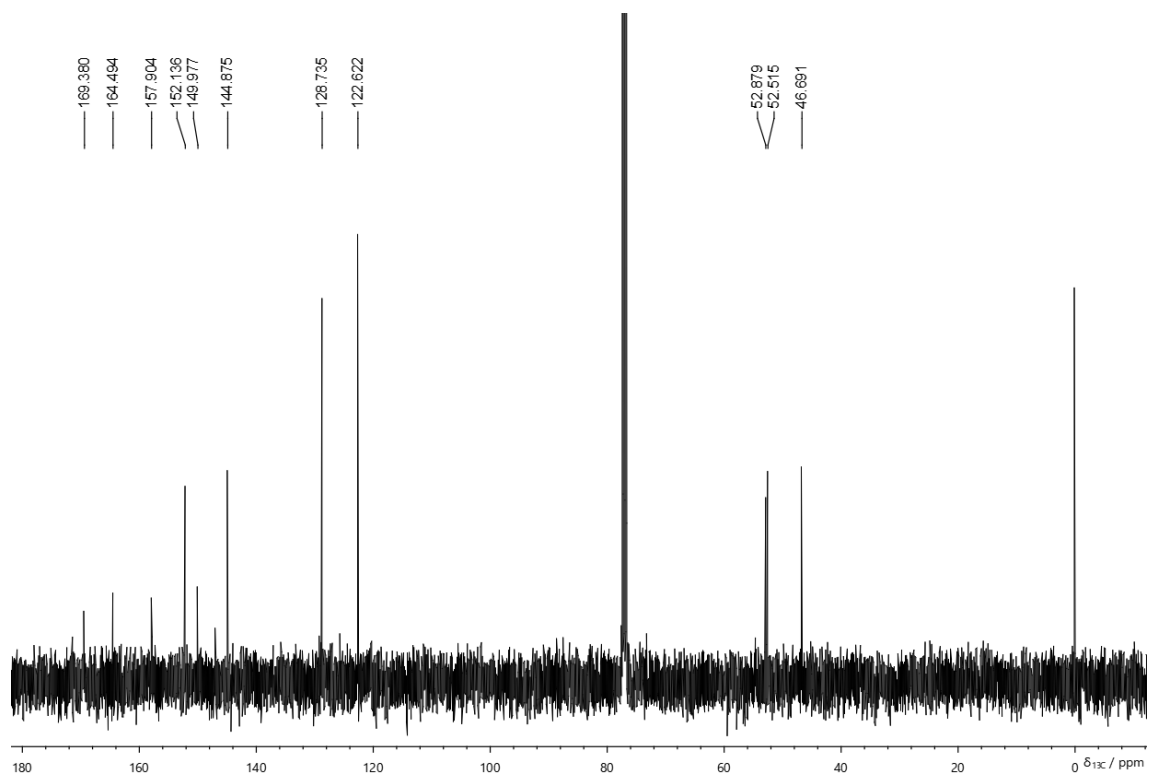

Figure S54.  $^{13}\text{C}$ -NMR spectrum (100 MHz) of **3b-DMAD** in  $\text{CDCl}_3$ .

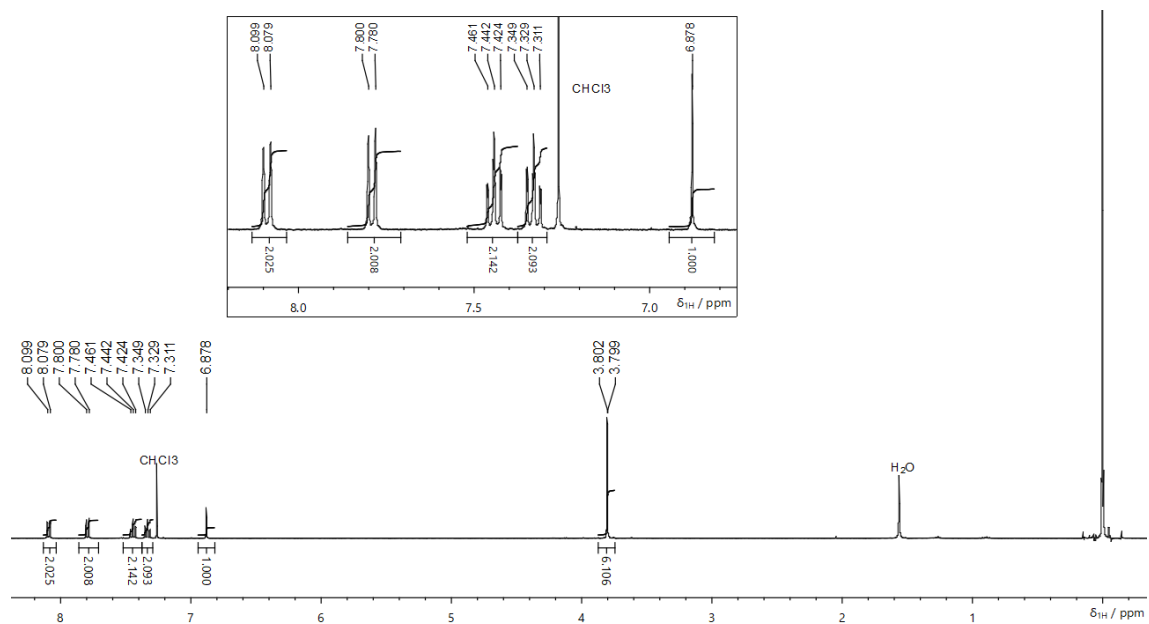

Figure S55.  $^1\text{H}$ -NMR spectrum (400 MHz) of **3c-DMAD** in  $\text{CDCl}_3$ .

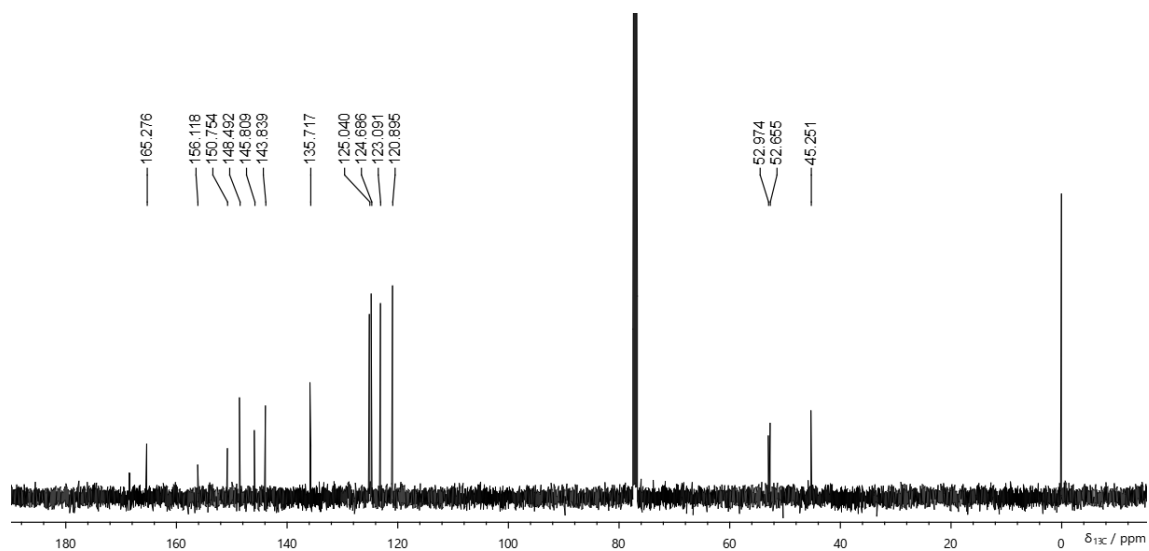

Figure S56.  $^{13}\text{C}$ -NMR spectrum (100 MHz) of **3c-DMAD** in  $\text{CDCl}_3$ .

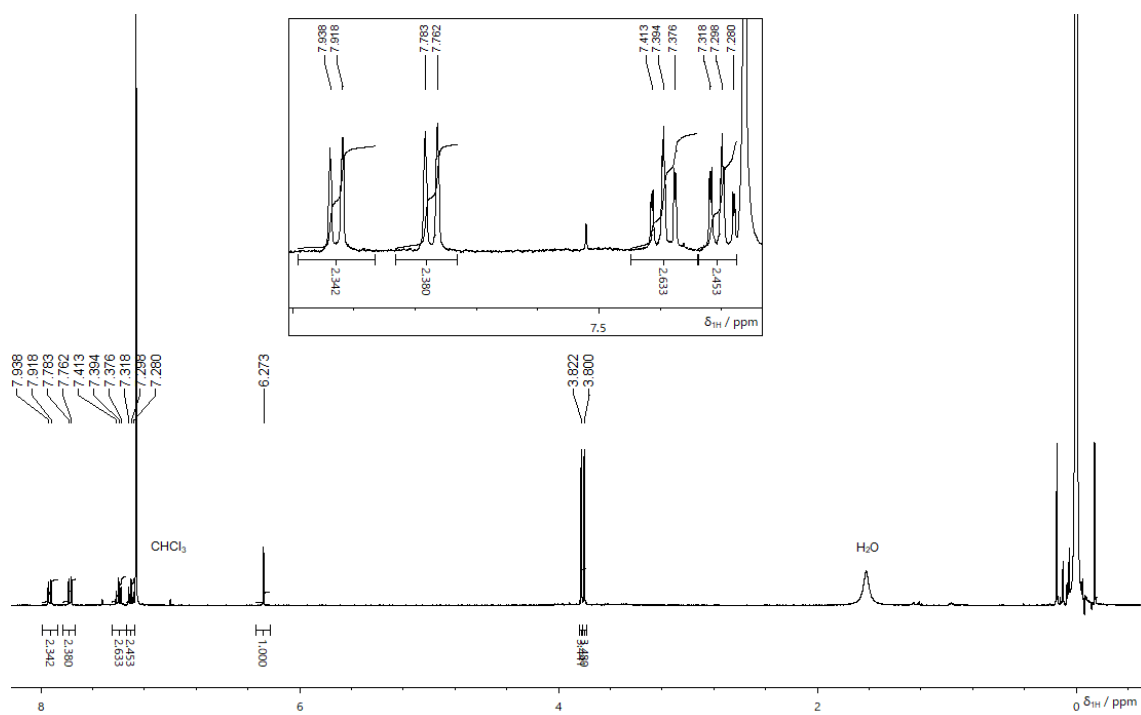

Figure S57.  $^1\text{H}$ -NMR spectrum (400 MHz) of **3d-DMAD** in  $\text{CDCl}_3$ .

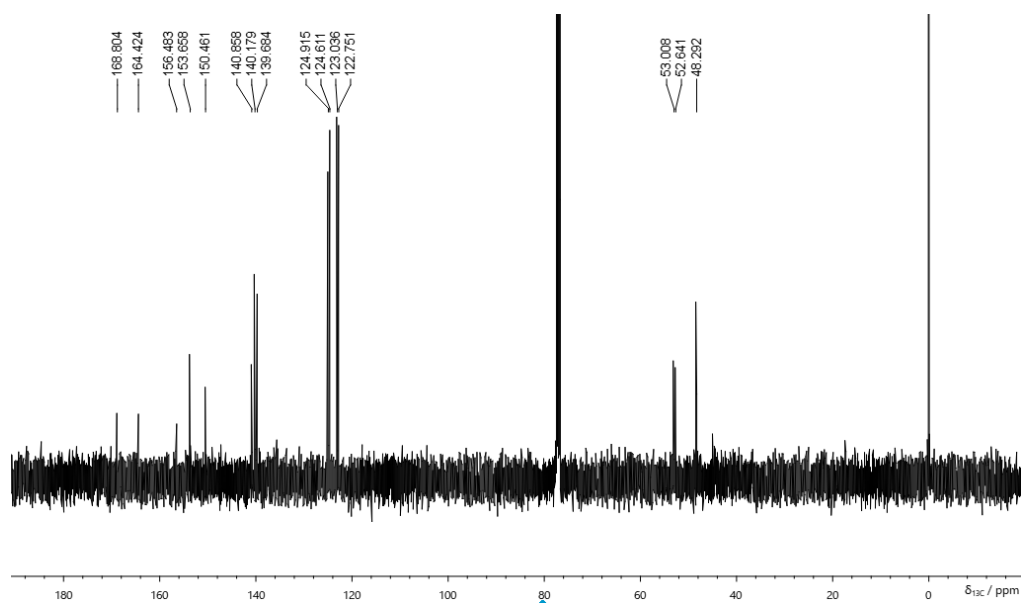

Figure S58.  $^{13}\text{C}$ -NMR spectrum (100 MHz) of **3d-DMAD** in  $\text{CDCl}_3$ .

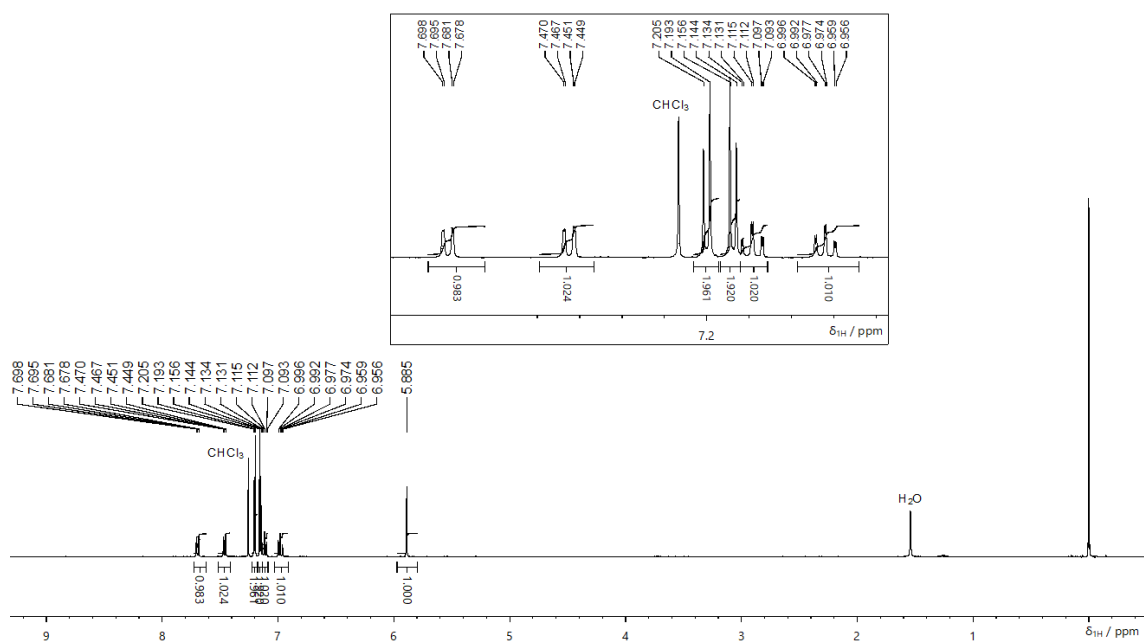

Figure S59.  $^1\text{H}$ -NMR spectrum (400 MHz) of **3a-benzyne** in  $\text{CDCl}_3$ .



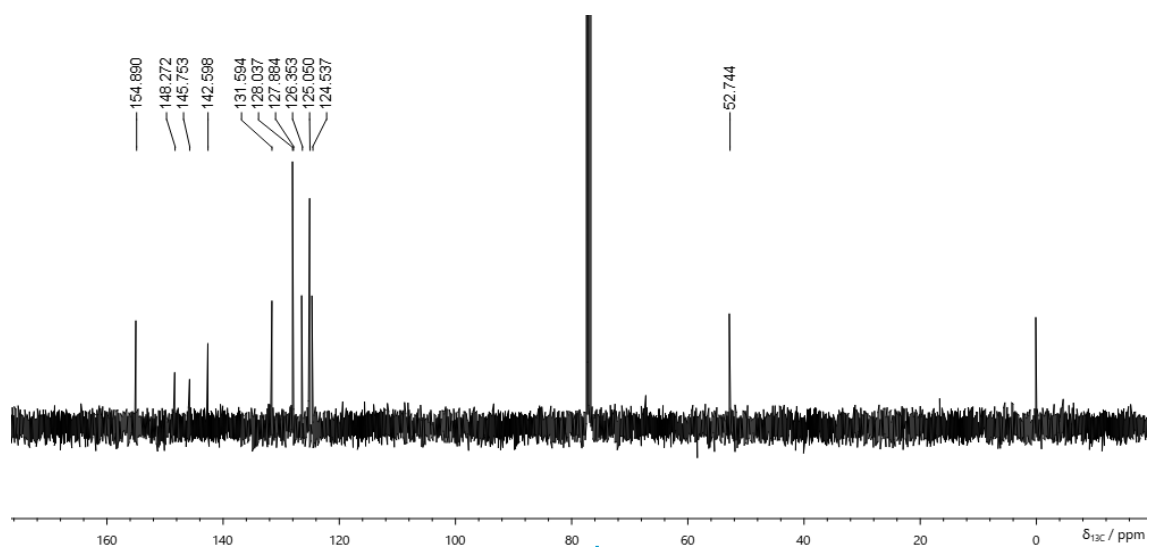

Figure S60.  $^{13}\text{C}$ -NMR spectrum (100 MHz) of **3a-benzyne** in  $\text{CDCl}_3$ .

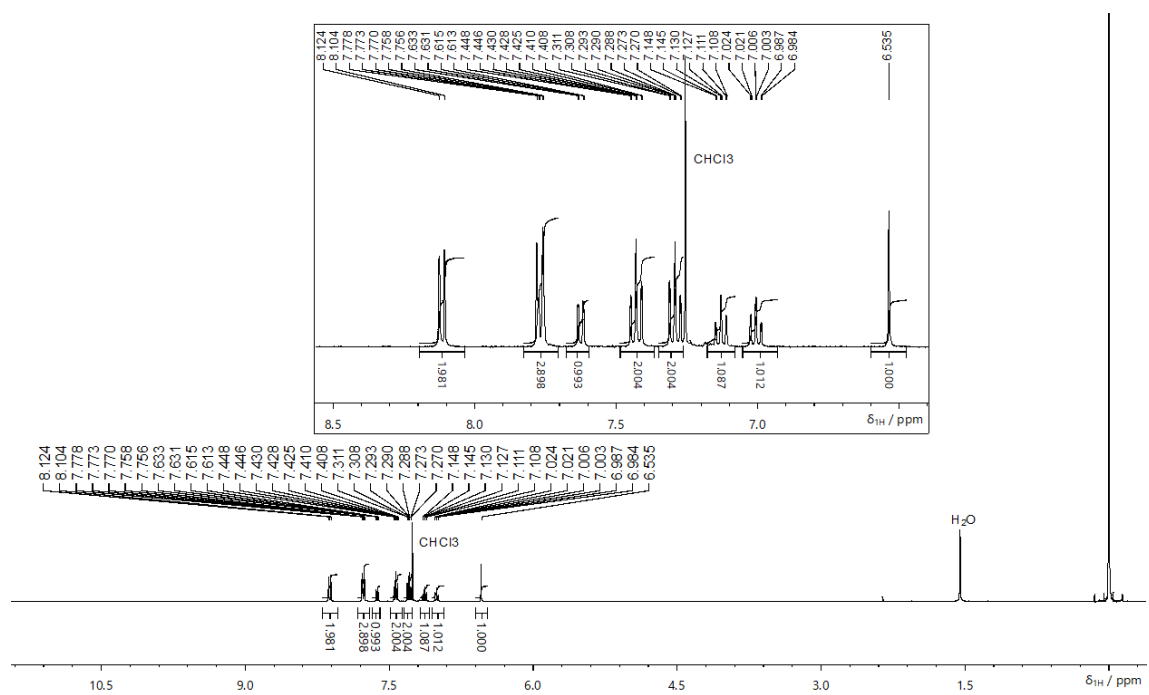

Figure S61.  $^1\text{H}$ -NMR spectrum (400 MHz) of **3c-benzyne** in  $\text{CDCl}_3$ .

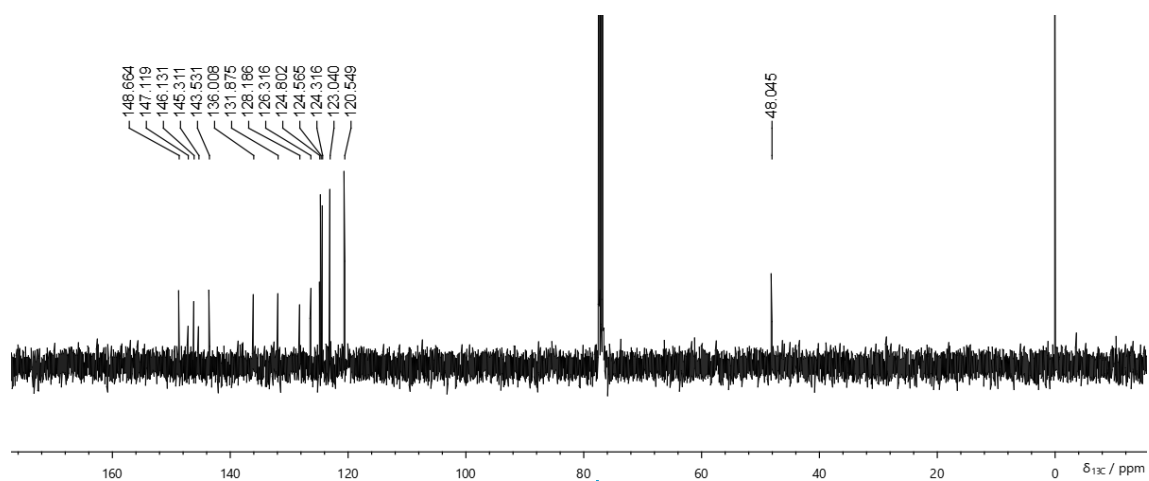

**Figure S62.**  $^{13}\text{C}$ -NMR spectrum (100 MHz) of **3c-benzyne** in  $\text{CDCl}_3$ .

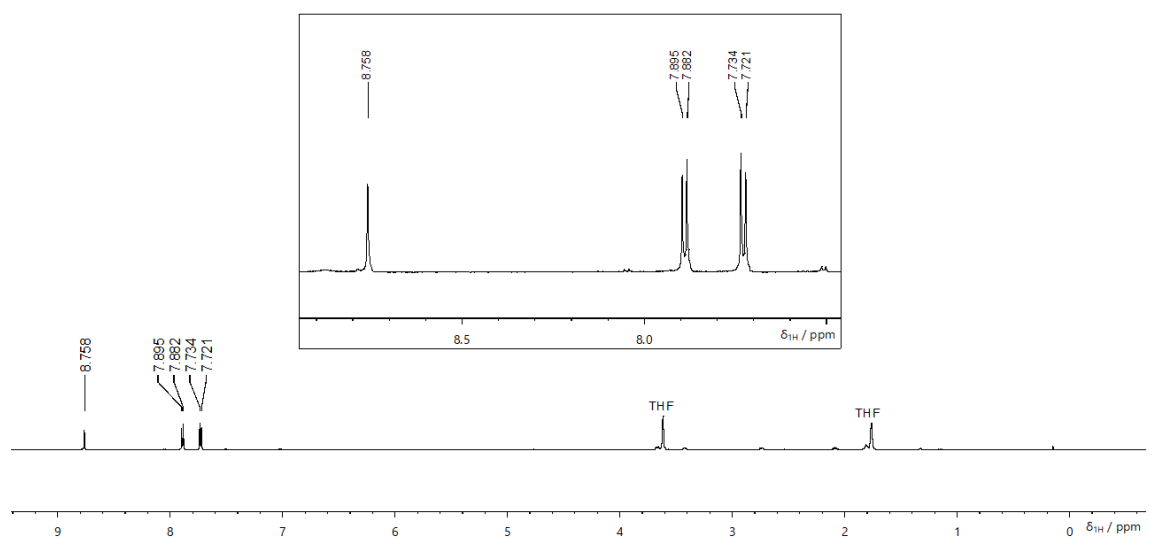

**Figure S63.**  $^1\text{H}$ -NMR spectrum (400 MHz) of **3a-W(CO)<sub>5</sub>** in  $\text{CDCl}_3$ . Minor impurities (1-4 ppm) were attributed to atmospheric solvent in the glove box.

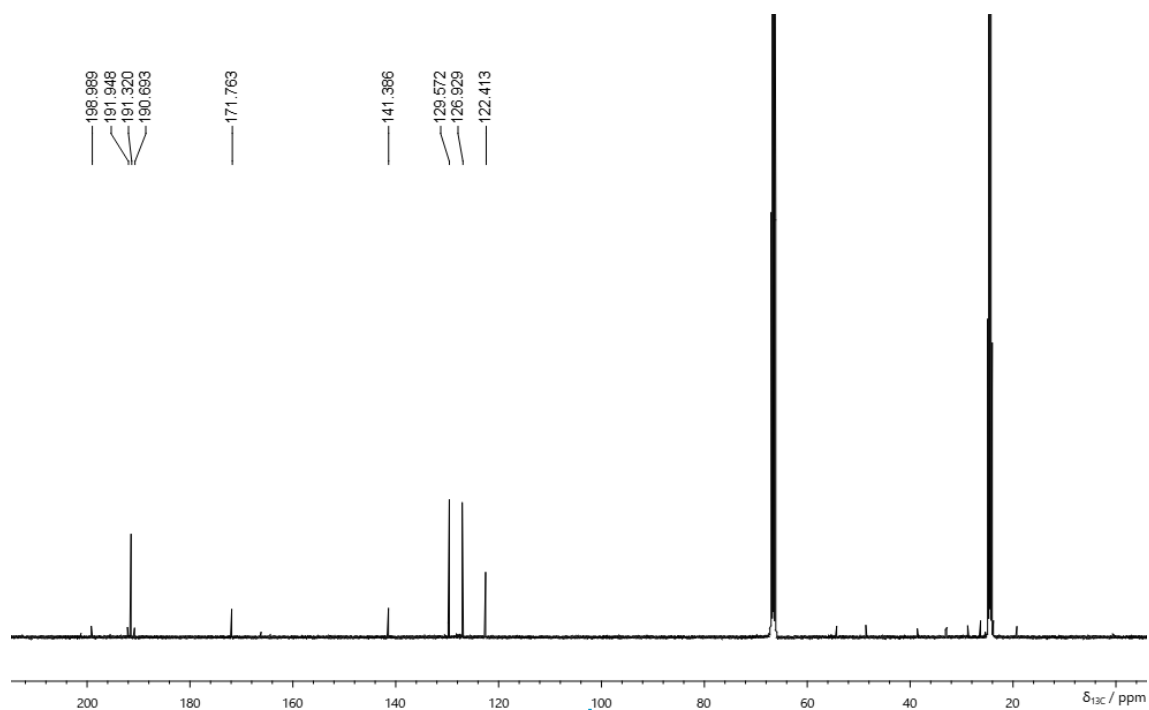

**Figure S64.**  $^{13}\text{C}$ -NMR spectrum (100 MHz) of  $3\text{a-W}(\text{CO})_5$  in  $\text{CDCl}_3$ . Minor impurities (16-56 ppm) were attributed to atmospheric solvent in the glove box.

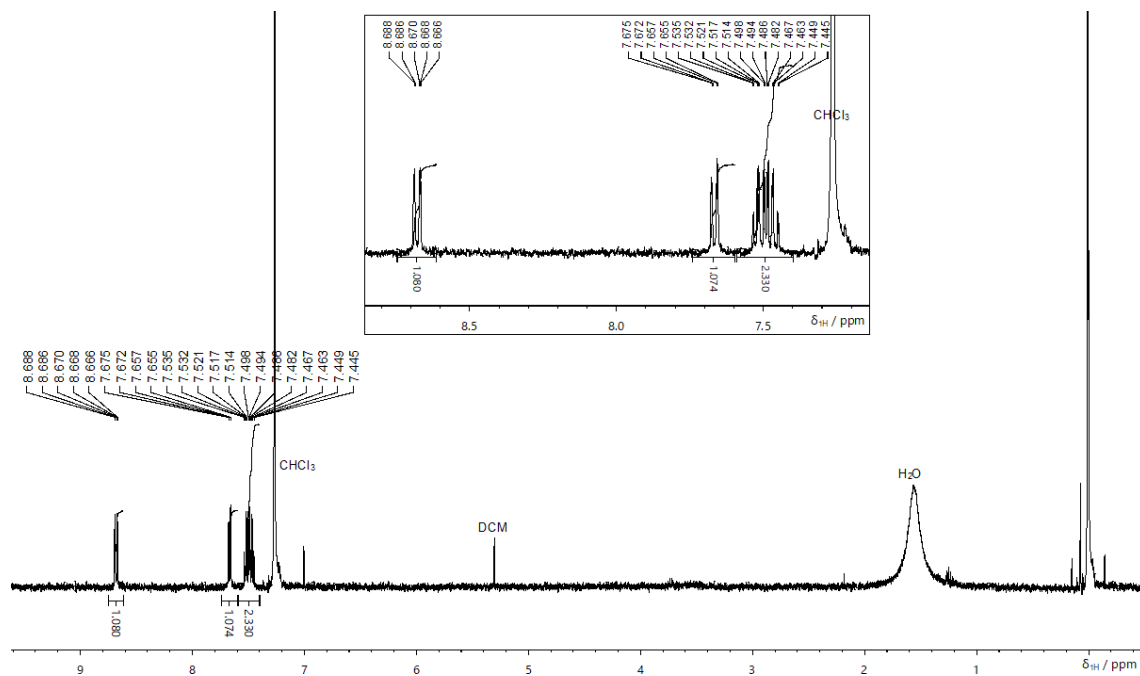

**Figure S65.**  $^1\text{H}$ -NMR spectrum (400 MHz) of  $3\text{d}'$  in  $\text{CDCl}_3$ .

## Reference

- [1] (a) H. Wynberg, A. Kraak, *J. Org. Chem.* **1964**, *29*, 2455. (b) A. Kraak, A. K. Wiersema, P. Jordens, H. Wynberg, *Tetrahedron* **1968**, *24*, 3381.
- [2] J. C. Bijleveld, M. Shahid, J. Gilot, M. M. Wienk, R. A. J. Janssen, *Adv. Funct. Mater.* **2009**, *19*, 3262.
- [3] S. Tanaka, M. Konishi, H. Imoto, Y. Nakamura, M. Ishida, H. Furuta, K. Naka, *Inorg. Chem.* **2020**, *59*, 9587.
- [4] L. E. Doyle, W. E. Piers, J. B.- Garcia, *J. Am. Chem. Soc.* **2015**, *137*, 2187.
- [5] K. Matsuo, R. Okumura, H. Hayashi, N. Aratani, S. Jinnai, Y. Ie, A. Saeki, H. Yamada, *Chem. Commun.* **2022**, *58*, 13576.
- [6] *CrysAlisPro Software System, Rigaku Oxford Diffraction* **2020**.
- [7] R. C. Clark, J. S. Reid, Analytical numerical absorption correction multi-faceted crystal model, *Acta Crystallogr., Sect. A: Found. Crystallogr.* **1995**, *51*, 887.
- [8] G. M. Sheldrick, *SHELXT, Acta Crystallogr., Sect. C: Struct. Chem.* **2015**, *A71*, 3.
- [9] O. V. Dolomanov, L. J. Bourhis, R. J. Gildea, J. A. K. Howard, H. J. Puschmann, *Olex2 J. Appl. Crystallogr.* **2009**, *42*, 339.
- [10] G. M. Sheldrick, *SHELXL2016, Acta Crystallogr., Sect. C: Struct. Chem.* **2015**, *C71*, 3.
- [11] Gaussian 16, Revision C.01, M. J. Frisch, G. W. Trucks, H. B. Schlegel, G. E. Scuseria, M. A. Robb, J. R. Cheeseman, G. Scalmani, V. Barone, G. A. Petersson, H. Nakatsuji, X. Li, M. Caricato, A. V. Marenich, J. Bloino, B. G. Janesko, R. Gomperts, B. Mennucci, H. P. Hratchian, J. V. Ortiz, A. F. Izmaylov, J. L. Sonnenberg, D. Williams-Young, F. Ding, F. Lipparini, F. Egidi, J. Goings, B. Peng, A. Petrone, T. Henderson, D. Ranasinghe, V. G. Zakrzewski, J. Gao, N. Rega, G. Zheng, W. Liang, M. Hada, M. Ehara, K. Toyota, R. Fukuda, J. Hasegawa, M. Ishida, T. Nakajima, Y. Honda, O. Kitao, H. Nakai, T. Vreven, K. Throssell, J. A. Montgomery, Jr., J. E. Peralta, F. Ogliaro, M. J. Bearpark, J. J. Heyd, E. N. Brothers, K. N. Kudin, V. N. Staroverov, T. A. Keith, R. Kobayashi, J. Normand, K. Raghavachari, A. P. Rendell, J. C. Burant, S. S. Iyengar, J. Tomasi, M. Cossi, J. M. Millam, M. Klene, C. Adamo, R. Cammi, J. W. Ochterski, R. L. Martin, K. Morokuma, O. Farkas, J. B. Foresman and D. J. Fox, Gaussian, Inc., Wallingford CT, **2016**.
- [12] A. E. Reed, L. A. Curtiss, F. Weinhold, *Chem. Rev.* **1988**, *88*, 899.
- [13] F. Jensen, *J. Chem. Theory Comput.* **2015**, *11*, 132.
- [14] R. G.- Poranne, A. Stanger, *Chem. Eur. J.* **2014**, *20*, 5673.
- [15] Z. Wang, py.Aroma 3. <https://wongzit.github.io/program/pyaroma>
- [16] R. Herges, D. Geuenich, *J. Phys. Chem. A* **2001**, *105*, 3214.

- [17] (a) R. A. Boto, F. Peccati, R. Laplaza, C. Quan, A. Carbone, J.-P. Piquemal, Y. Maday, J. Contreras-García, *J. Chem. Theory Comput.* **2020**, *16*, 4150. (b) E. R. Johnson, S. Keinan, P. Mori-Sánchez, J. Contreras-García, A. J. Cohen, W. Yang, *J. Am. Chem. Soc.* **2010**, *132*, 6498.
- [18] T. Lu, F. Chen, *J. Comput. Chem.* **2012**, *33*, 580
- [19] VMD ver. 1.9.4a53 W. Humphrey, A. Dalke, K. Schulten, *J. Mol. Graphics* **1996**, *14*, 33.
- [20] ADF2023, SCM, Theoretical Chemistry. Vrije Universiteit, Amsterdam, The Netherlands, <http://www.scm.com>.
